# Supplementary material for: Synthesis of benzo[1,3]oxazines via copper(i)-catalyzed cascade annulation of nitriles, aldehydes and diaryliodonium salts
Source: Royal Society of Chemistry journal article supplement (doi:10.1039/c6qo00012f), 2016-01-01
Supplement: c6qo00012f1.pdf [file c6qo00012f1.pdf]

# Synthesis of Benzo[1,3]oxazines via Copper(I)-catalyzed Cascade Annulation of Nitriles, Aldehydes and Diaryliodonium Salts

Jinyu Sheng,<sup>a</sup> Xiang Su,<sup>a</sup> Chengyao Cao<sup>a</sup> and Chao Chen<sup>a\*</sup>

Key Laboratory of Bioorganic Phosphorus Chemistry & Chemical Biology (Ministry of Education), Department of Chemistry, Tsinghua University, Beijing 100084, China.  
Tel: +86-10-62773684. E-mail: chenchao01@mails.tsinghua.edu.cn;

## List of the contents:

|                                                                |     |
|----------------------------------------------------------------|-----|
| 1. General Comments.....                                       | S3  |
| 2. Experimental Section.....                                   | S4  |
| 3. Spectra Data of Synthesized Benzo[d][1,3]oxazine 4aaa.....  | S6  |
| 4. Spectra Data of Synthesized Benzo[d][1,3]oxazine 4aab.....  | S8  |
| 5. Spectra Data of Synthesized Benzo[d][1,3]oxazine 4aac.....  | S10 |
| 6. Spectra Data of Synthesized Benzo[d][1,3]oxazine 4aad.....  | S12 |
| 7. Spectra Data of Synthesized Benzo[d][1,3]oxazine 4aae.....  | S14 |
| 8. Spectra Data of Synthesized Benzo[d][1,3]oxazine 4aaf.....  | S16 |
| 9. Spectra Data of Synthesized Benzo[d][1,3]oxazine 4aag.....  | S18 |
| 10. Spectra Data of Synthesized Benzo[d][1,3]oxazine 4aah..... | S20 |
| 11. Spectra Data of Synthesized Benzo[d][1,3]oxazine 4aai..... | S22 |
| 12. Spectra Data of Synthesized Benzo[d][1,3]oxazine 4aaj..... | S24 |
| 13. Spectra Data of Synthesized Benzo[d][1,3]oxazine 4aak..... | S26 |
| 14. Spectra Data of Synthesized Benzo[d][1,3]oxazine 4aal..... | S28 |
| 15. Spectra Data of Synthesized Benzo[d][1,3]oxazine 4aam..... | S30 |
| 16. Spectra Data of Synthesized Benzo[d][1,3]oxazine 4aan..... | S32 |
| 17. Spectra Data of Synthesized Benzo[d][1,3]oxazine 4aao..... | S34 |
| 18. Spectra Data of Synthesized Benzo[d][1,3]oxazine 4aap..... | S36 |
| 19. Spectra Data of Synthesized Benzo[d][1,3]oxazine 4aaq..... | S38 |
| 20. Spectra Data of Synthesized Benzo[d][1,3]oxazine 4abb..... | S40 |
| 21. Spectra Data of Synthesized Benzo[d][1,3]oxazine 4acb..... | S42 |

|                                                                |     |
|----------------------------------------------------------------|-----|
| 22. Spectra Data of Synthesized Benzo[d][1,3]oxazine 4adb..... | S44 |
| 23. Spectra Data of Synthesized Benzo[d][1,3]oxazine 4aeb..... | S46 |
| 24. Spectra Data of Synthesized Benzo[d][1,3]oxazine 4afb..... | S48 |
| 25. Spectra Data of Synthesized Benzo[d][1,3]oxazine 4agb..... | S50 |
| 26. Spectra Data of Synthesized Benzo[d][1,3]oxazine 4ahb..... | S52 |
| 27. Spectra Data of Synthesized Benzo[d][1,3]oxazine 4aib..... | S54 |
| 28. Spectra Data of Synthesized Benzo[d][1,3]oxazine 4ajb..... | S56 |
| 29. Spectra Data of Synthesized Benzo[d][1,3]oxazine 4akb..... | S58 |
| 30. Spectra Data of Synthesized Benzo[d][1,3]oxazine 4alb..... | S60 |
| 31. Spectra Data of Synthesized Benzo[d][1,3]oxazine 4amb..... | S62 |
| 32. Spectra Data of Synthesized Benzo[d][1,3]oxazine 4aab..... | S64 |
| 33. Spectra Data of Synthesized Benzo[d][1,3]oxazine 4bab..... | S66 |
| 34. Spectra Data of Synthesized Benzo[d][1,3]oxazine 4cab..... | S68 |
| 35. Spectra Data of Synthesized Benzo[d][1,3]oxazine 4dab..... | S70 |
| 36. Spectra Data of Synthesized Benzo[d][1,3]oxazine 4eab..... | S72 |
| 37. Spectra Data of Synthesized Benzo[d][1,3]oxazine 4fab..... | S74 |
| 38. Spectra Data of Synthesized Benzo[d][1,3]oxazine 4gab..... | S76 |
| 39. Spectra Data of Synthesized Benzo[d][1,3]oxazine 4hab..... | S78 |
| 40. References.....                                            | S79 |

## 1. General Comments

All the reactions were carried out in pre-dried a screwcapped tube with a Teflon-lined septum under N<sub>2</sub> atmosphere. Diaryliodonium reagents were prepared according to the literatures<sup>1</sup>. All of the solvents were fresh distilled. Column chromatography was performed on silica gel (particle size 10-40 μm, Ocean Chemical Factory of Qingdao, China). <sup>1</sup>H NMR and <sup>13</sup>C NMR spectra were recorded on a JEOL AL-300MHz or AL-400MHz spectrometer at ambient temperature with CDCl<sub>3</sub> as the solvent. Chemical shifts (δ) were given in ppm, referenced to the residual proton resonance of CDCl<sub>3</sub> (7.26), to the carbon resonance of CDCl<sub>3</sub> (77.16). Coupling constants (J) were given in Hertz (Hz). The term m, dq, q, t, d, s referred to multiplet, doublet quartet, quartet, triplet, doublet, singlet. Mass spectra were obtained using Bruker Esquire ion trap mass spectrometer in positive mode. The reaction progress was monitored by GC-MS if applicable, using n-Dodecane as internal standard.

## 2 Experimental Sections

### General procedure for the preparation of desired compound

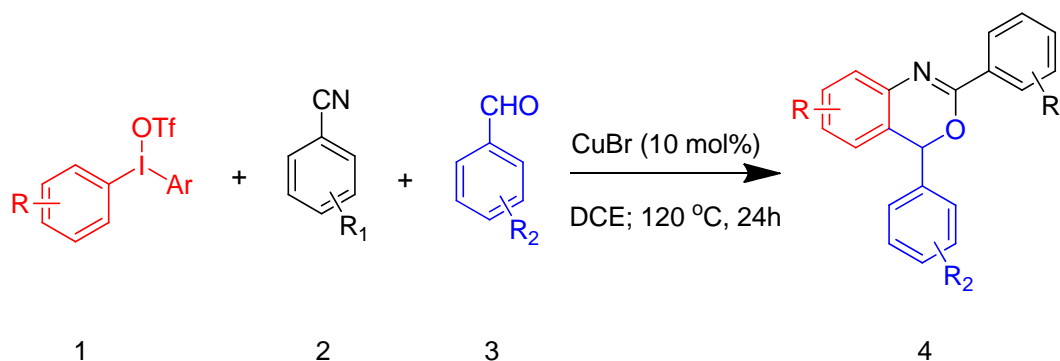

A sealed tube was charged with the mixture of diaryliodonium triflates (0.5 mmol), nitrile (0.5 mmol), aldehyde (0.5 mmol), then stirred in dichloroethane (2.5 mL) at 120 °C under nitrogen atmosphere for indicated time. After completion, the crude product was diluted with water (5 mL) and extracted with ethyl acetate. The organic layer was dried over anhydrous MgSO<sub>4</sub>, filtered, and concentrated under reduced pressure. The crude product was purified by column chromatography (petroleum ether/ethyl acetate: 50:1 to 20:1) to obtain the corresponding product.

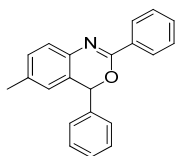

**6-methyl-2,4-diphenyl-4H-benzo[d][1,3]oxazine (4aaa):** white solid, 121 mg, yield: 81%, melt point: 154°C.

<sup>1</sup>H NMR (400 MHz, CHLOROFORM-D) δ 8.17 - 8.10 (m, 2H), 7.49 - 7.35 (m, 8H), 7.34 - 7.29 (m, 1H), 7.16 (d, J = 8.0 Hz, 1H), 6.67 (s, 1H), 6.41 (s, 1H), 2.30 (s, 3H).

<sup>13</sup>C NMR (101 MHz, CHLOROFORM-D) δ 156.3, 140.2, 137.1, 136.6, 132.8, 131.3, 129.9, 128.9, 128.9 (2×CH), 128.3(2×CH), 128.1(2×CH), 127.8(2×CH), 125.8, 125.0, 78.6, 21.4.

ESI-HRMS: m/z calcd for C<sub>21</sub>H<sub>17</sub>NO [M+H]<sup>+</sup>:300.1310; found: 300.1313.

GC-MS: 299

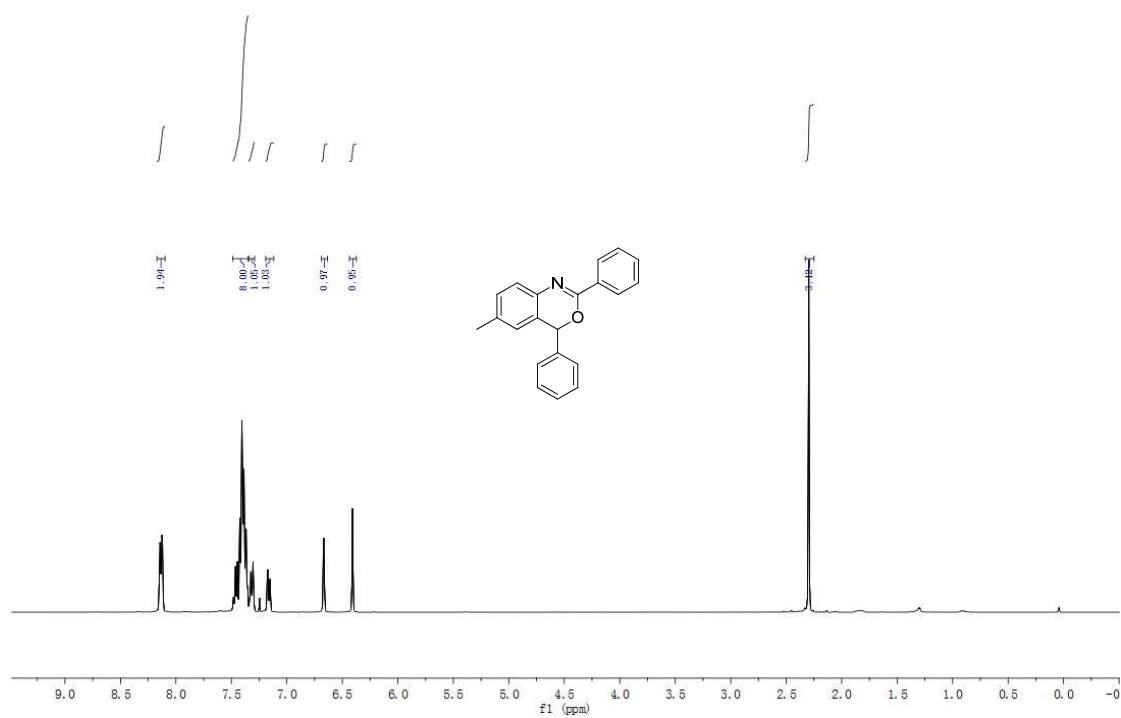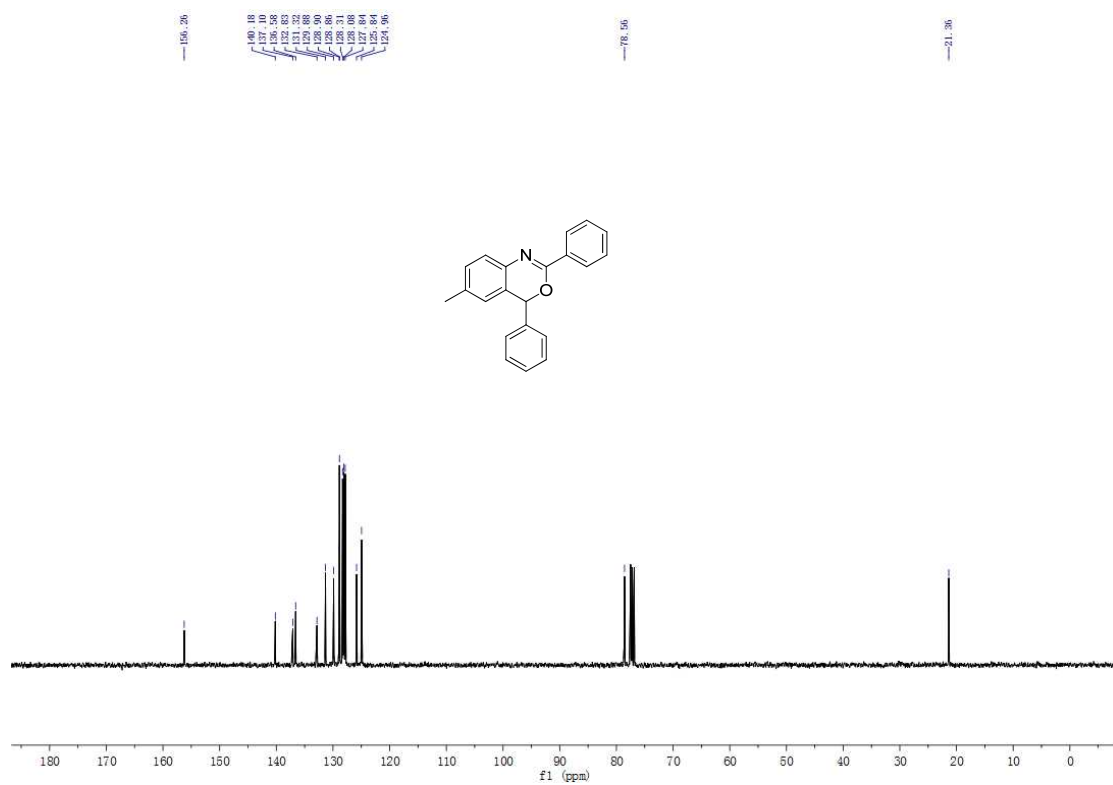

$^1\text{H NMR}$  (400 MHz,  $\text{CDCl}_3$ ) (up) and  $^{13}\text{C NMR}$  (101 MHz,  $\text{CDCl}_3$ ) (down)

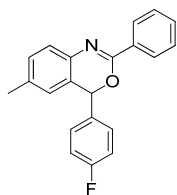

**4-(4-fluorophenyl)-6-methyl-2-phenyl-4H-benzo[d][1,3]oxazine (4aab):** colorless oil, 143 mg, yield: 90%.

$^1\text{H}$  NMR (400 MHz, CHLOROFORM-D)  $\delta$  8.08 (dt,  $J = 8.6, 1.9$  Hz, 2H), 7.45 (ddd,  $J = 6.1, 3.6, 1.3$  Hz, 1H), 7.42 - 7.32 (m, 4H), 7.29 (d,  $J = 7.9$  Hz, 1H), 7.15 (dd,  $J = 7.9, 1.3$  Hz, 1H), 7.09 - 7.01 (m, 2H), 6.63 (s, 1H), 6.37 (s, 1H), 2.29 (s, 3H).

$^{13}\text{C}$  NMR (101 MHz, CHLOROFORM-D)  $\delta$  163.0 (d,  $J = 247.5$  Hz), 156.1, 137.0, 136.7, 136.0 (d,  $J = 3.0$  Hz), 132.6, 131.4, 130.0, 129.8 (d,  $J = 8.4$  Hz, 2 $\times$ CH), 128.3(2 $\times$ CH), 128.0(2 $\times$ CH), 125.7, 125.0, 124.6, 115.8 (d,  $J = 21.5$  Hz, 2 $\times$ CH), 77.8, 21.3.

ESI-HRMS:  $m/z$  calcd for  $\text{C}_{21}\text{H}_{16}\text{FNO}$   $[\text{M}+\text{H}]^+$ :318.1216; found:318.1218.

GC-MS: 317.

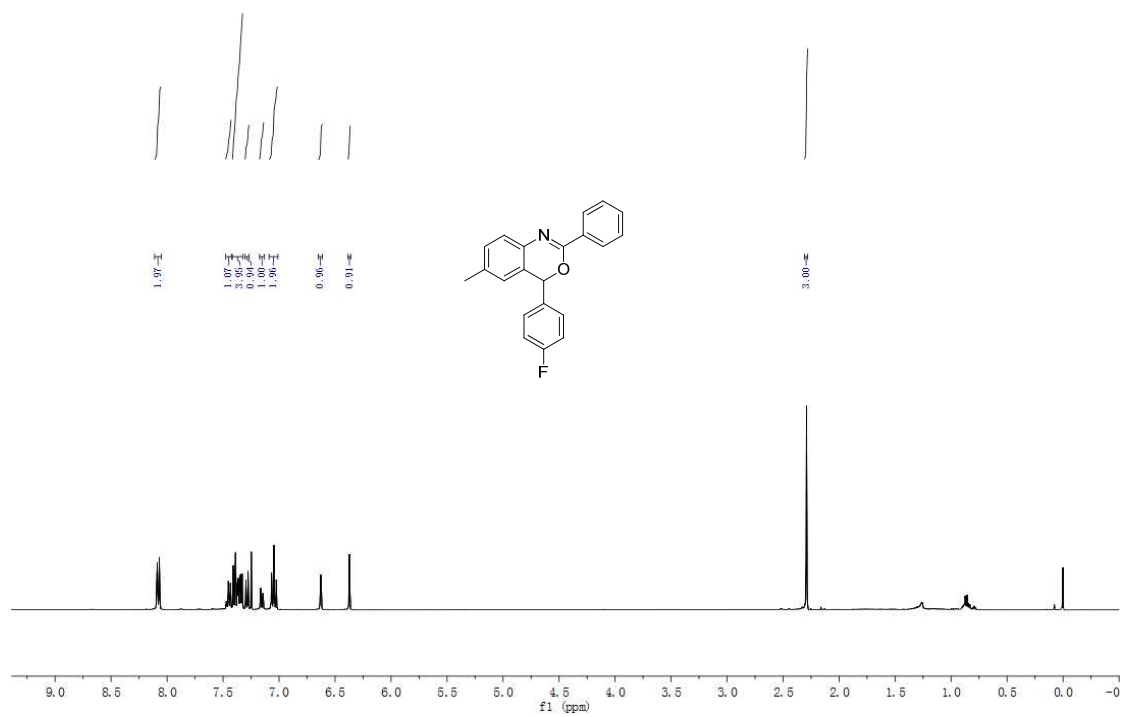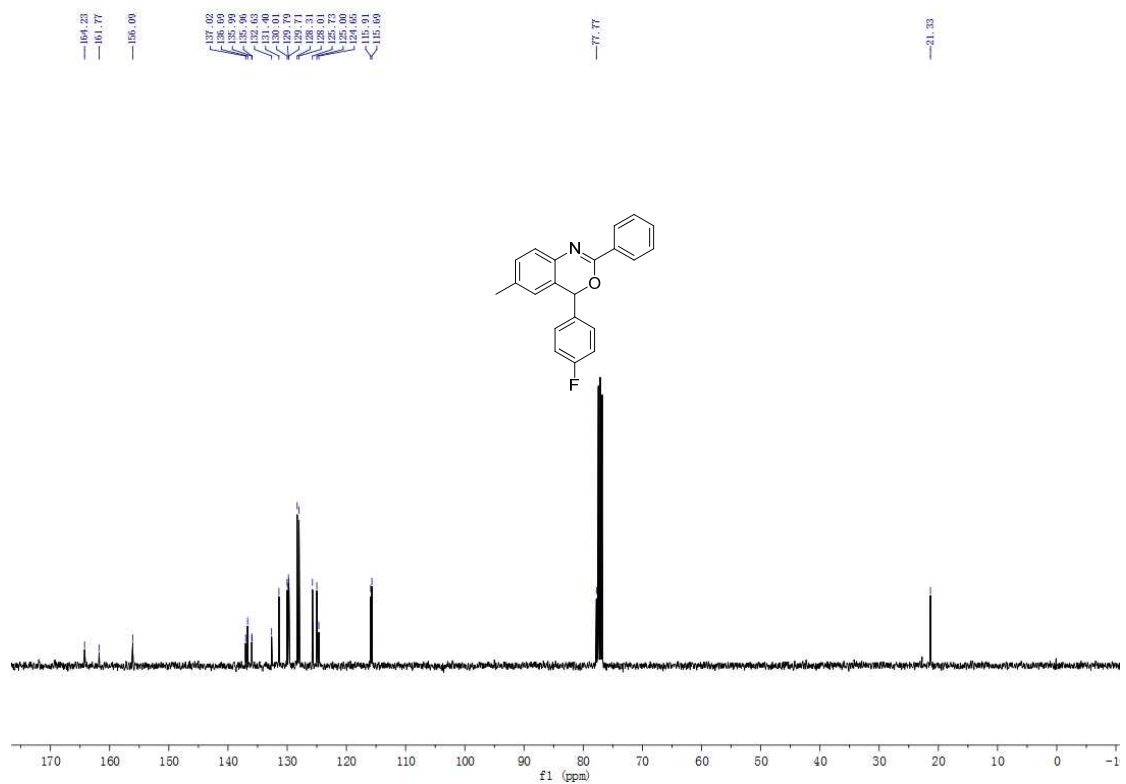

$^1\text{H NMR}$  (400 MHz,  $\text{CDCl}_3$ ) (up) and  $^{13}\text{C NMR}$  (101 MHz,  $\text{CDCl}_3$ ) (down)



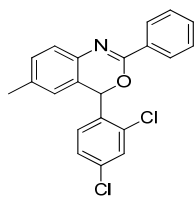

**4-(2,4-dichlorophenyl)-6-methyl-2-phenyl-4H-benzo[d][1,3]oxazine(4aac):** white solid, 174 mg, yield: 95%, melt point: 184 °C.

$^1\text{H}$  NMR (400 MHz, CHLOROFORM-D)  $\delta$  8.14 - 8.06 (m, 2H), 7.49 - 7.37 (m, 5H), 7.34 (d,  $J = 7.8$  Hz, 1H), 7.26 (d,  $J = 8.5$  Hz, 1H), 7.21 (d,  $J = 7.9$  Hz, 1H), 7.08 (d,  $J = 7.9$  Hz, 1H), 6.43 (s, 1H), 2.23 (s, 3H).

$^{13}\text{C}$  NMR (101 MHz, CHLOROFORM-D)  $\delta$  155.3, 137.2, 136.7, 136.5, 135.6, 135.4, 132.7, 131.2, 130.8, 130.4, 129.8, 128.3(2 $\times$ CH), 128.2, 127.9 (2 $\times$ CH), 125.2, 124.1, 122.2, 74.9, 21.4.

ESI-HRMS:  $m/z$  calcd for  $\text{C}_{21}\text{H}_{15}\text{Cl}_2\text{NO}$   $[\text{M}+\text{H}]^+$ : 368.0531; found: 368.0533.

GC-MS: 367.

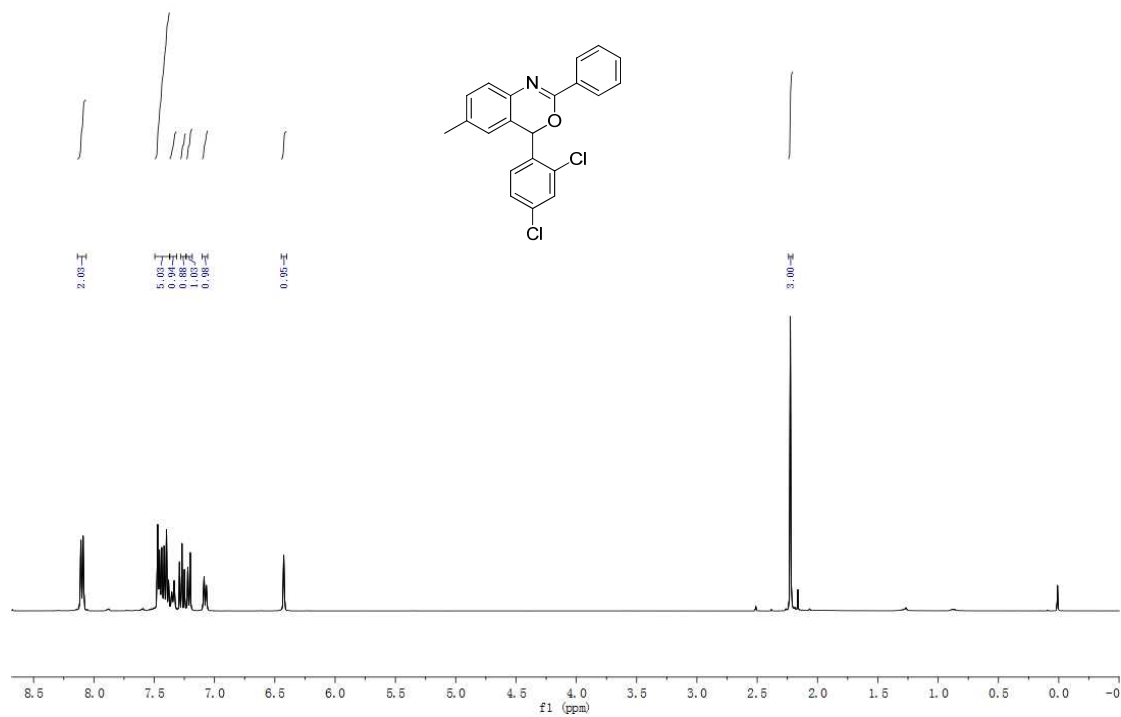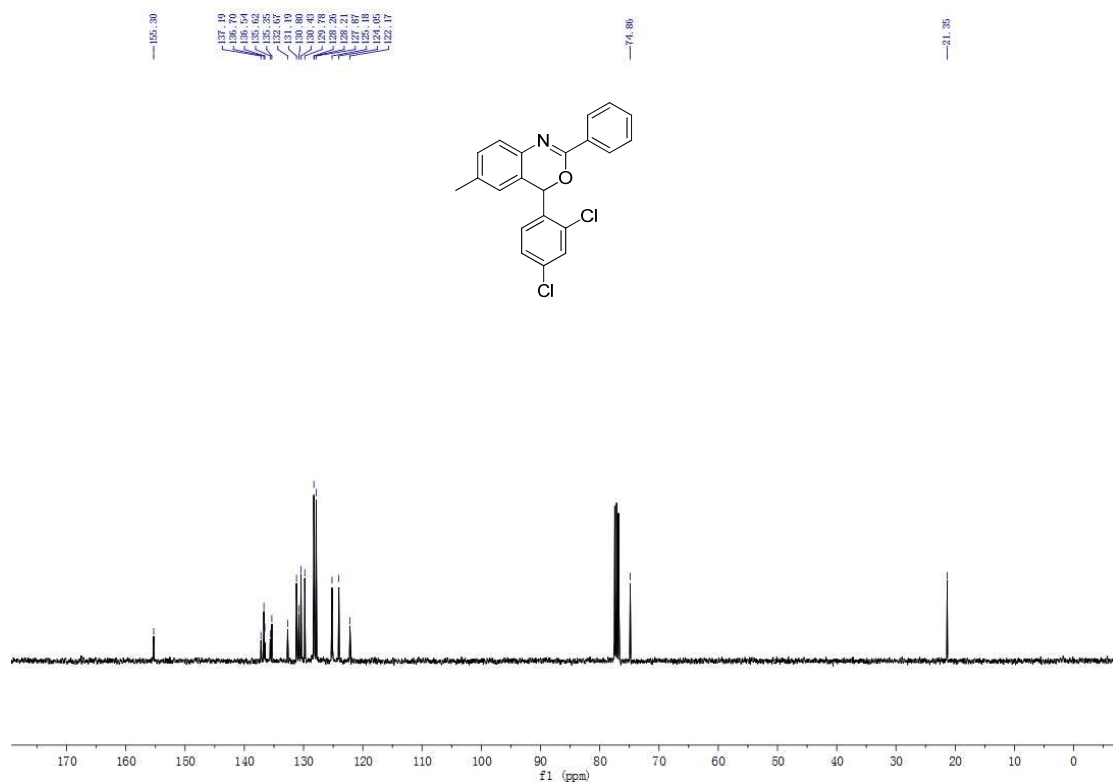

$^1\text{H NMR}$  (400 MHz,  $\text{CDCl}_3$ ) (up) and  $^{13}\text{C NMR}$  (101 MHz,  $\text{CDCl}_3$ ) (down)

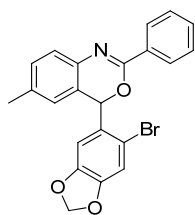

**4-(6-bromobenzo[d][1,3]dioxol-5-yl)-6-methyl-2-phenyl-4H-benzo[d][1,3]oxazine**

(**4aad**): white solid, 160 mg, yield: 76%, melt point: 190°C.

$^1\text{H}$  NMR (400 MHz, CHLOROFORM-D)  $\delta$  8.14 - 8.06 (m, 2H), 7.46 - 7.36 (m, 3H), 7.29 (d,  $J = 7.9$  Hz, 1H), 7.16 (d,  $J = 7.8$  Hz, 1H), 7.09 (s, 1H), 6.80 (d,  $J = 7.7$  Hz, 1H), 6.67 (s, 1H), 6.60 (s, 1H), 5.95 - 5.89 (m, 2H), 2.30 (s, 3H).

$^{13}\text{C}$  NMR (101 MHz, CHLOROFORM-D)  $\delta$  156.2, 148.8, 147.9, 137.3, 136.9, 132.6, 132.5, 131.4, 130.2, 128.3(2 $\times$ CH), 128.2(2 $\times$ CH), 125.7, 125.0, 123.9, 114.6, 112.9, 109.8, 102.1, 76.8, 21.4.

ESI-HRMS:  $m/z$  calcd for  $\text{C}_{22}\text{H}_{16}\text{BrNO}$   $[\text{M}+\text{H}]^+$ : 422.0314; found: 422.0311.

GC-MS: 421.

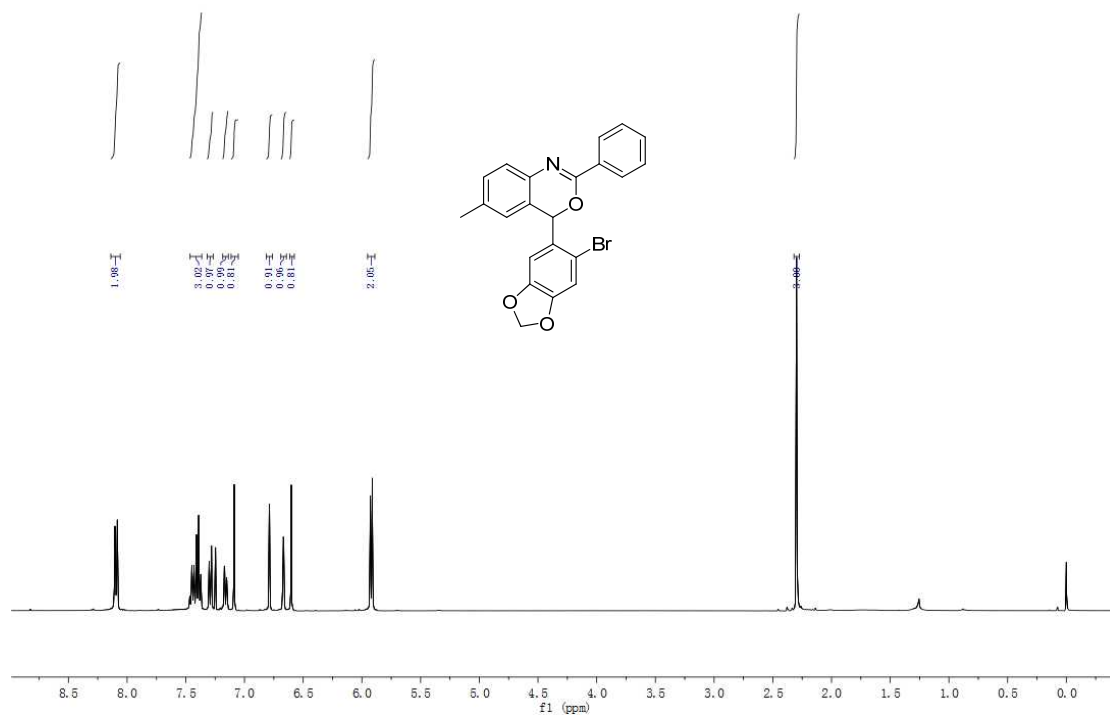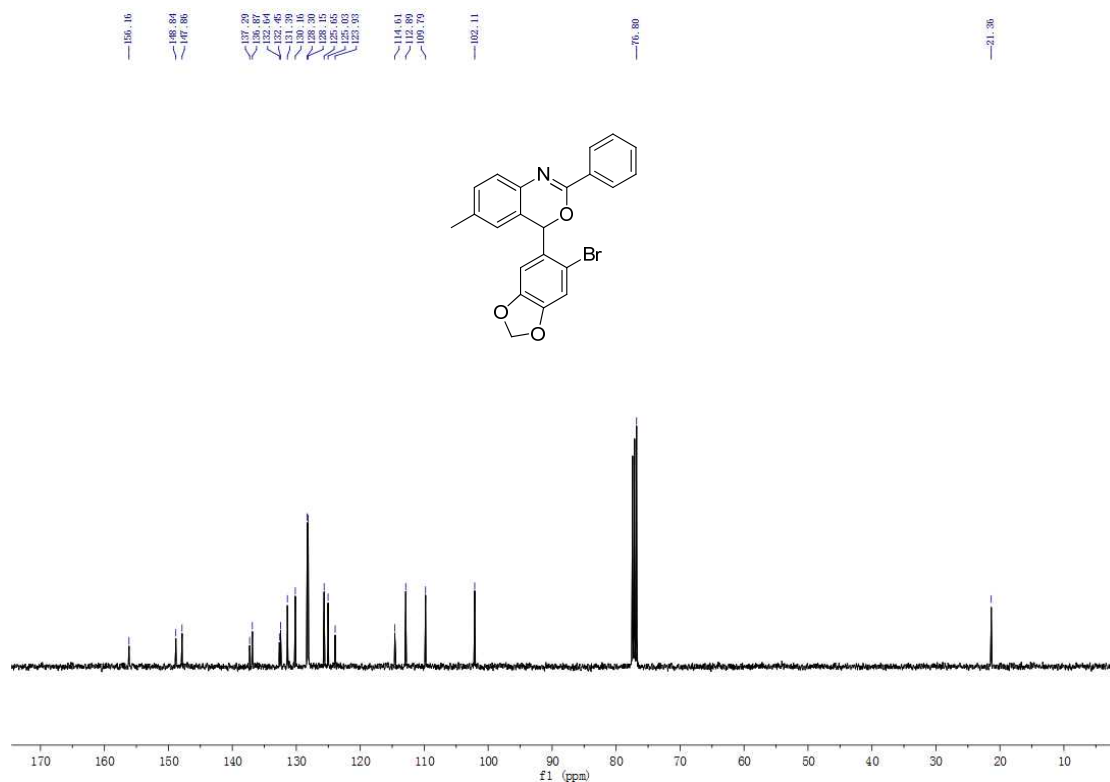

$^1\text{H NMR}$  (400 MHz,  $\text{CDCl}_3$ ) (up) and  $^{13}\text{C NMR}$  (101 MHz,  $\text{CDCl}_3$ ) (down)

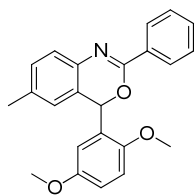

**4-(2,5-dimethoxyphenyl)-6-methyl-2-phenyl-4H-benzo[d][1,3]oxazine (4aae):** colorless oil, 93 mg, yield: 54%.

$^1\text{H}$  NMR (400 MHz, CHLOROFORM-D)  $\delta$  8.14 - 8.07 (m, 2H), 7.47 - 7.37 (m, 3H), 7.26 (d,  $J = 7.9$  Hz, 1H), 7.11 (d,  $J = 7.7$  Hz, 1H), 6.92 (d,  $J = 8.9$  Hz, 1H), 6.84 (dd,  $J = 8.7, 3.1$  Hz, 2H), 6.79 (d,  $J = 3.0$  Hz, 1H), 6.66 (s, 1H), 3.88 (s, 3H), 3.64 (s, 3H), 2.27 (s, 3H).

$^{13}\text{C}$  NMR (101 MHz, CHLOROFORM-D)  $\delta$  156.6, 153.9, 151.2, 137.3, 136.5, 133.0, 131.2, 129.8, 129.6, 128.2(2 $\times$ CH), 128.1(2 $\times$ CH), 125.6, 124.9, 124.7, 114.8, 114.6, 112.2, 72.6, 56.4, 55.7, 21.4.

ESI-HRMS:  $m/z$  calcd for  $\text{C}_{23}\text{H}_{21}\text{NO}_3$   $[\text{M}+\text{H}]^+$ :360.1521; found:360.1522.

GC-MS: 359.

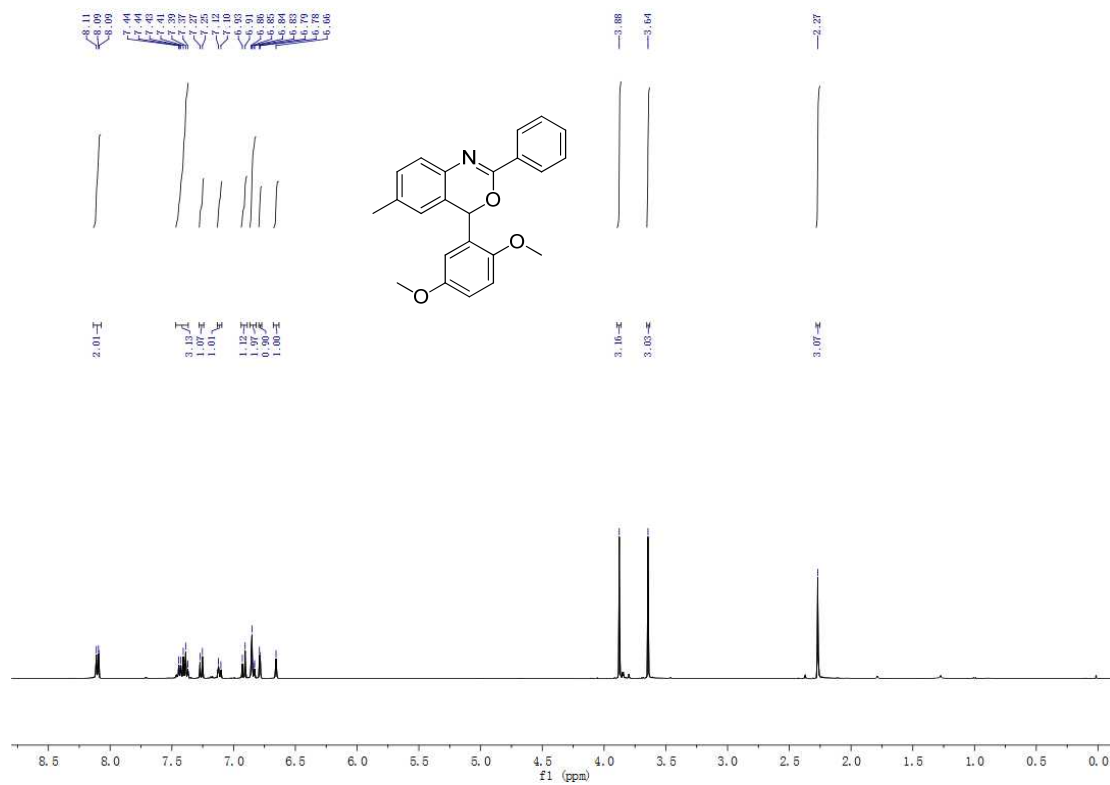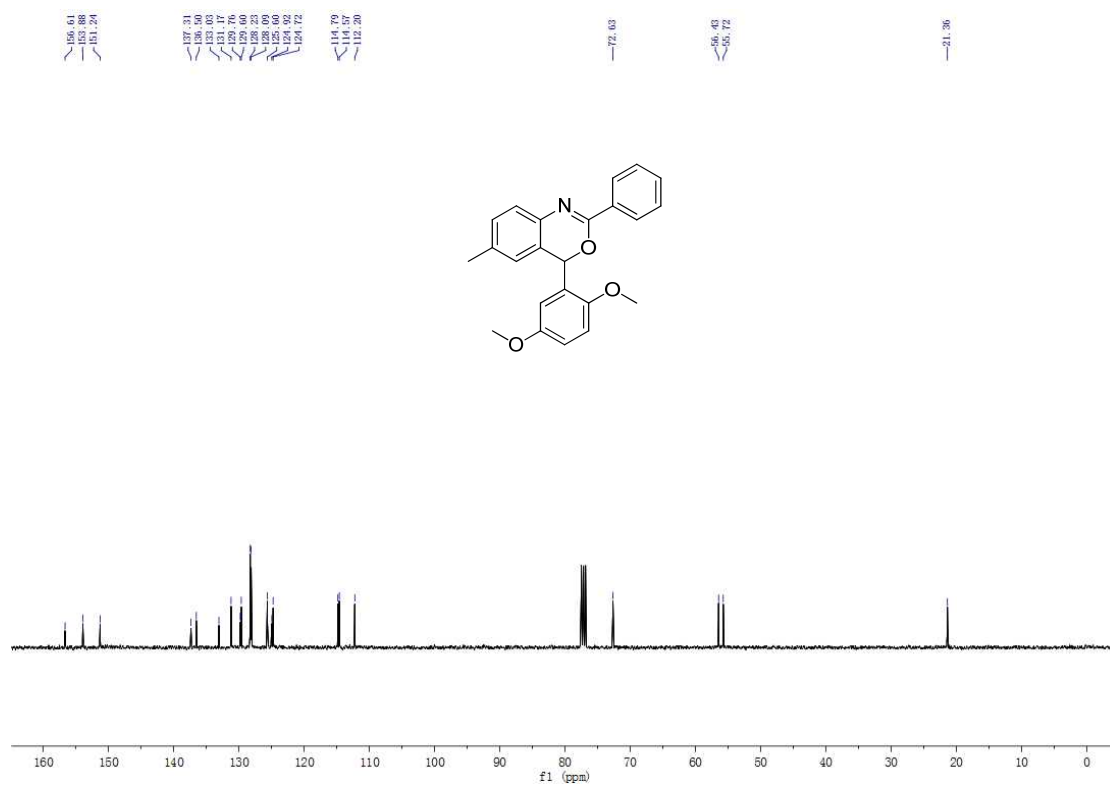

$^1\text{H NMR}$  (400 MHz,  $\text{CDCl}_3$ ) (up) and  $^{13}\text{C NMR}$  (101 MHz,  $\text{CDCl}_3$ ) (down)

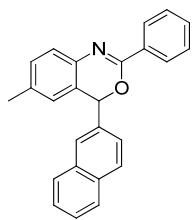

**6-methyl-4-(naphthalen-2-yl)-2-phenyl-4H-benzo[d][1,3]oxazine (4aaf):** white solid, 98 mg, yield: 56%, melt point: 150 °C.

$^1\text{H}$  NMR (400 MHz, CHLOROFORM-D)  $\delta$  8.13 - 8.08 (m, 2H), 7.89 - 7.80 (m, 3H), 7.78 (s, 1H), 7.56 (dd,  $J = 8.5, 1.7$  Hz, 1H), 7.53 - 7.47 (m, 2H), 7.46 - 7.41 (m, 1H), 7.38 (t,  $J = 7.4$  Hz, 2H), 7.19 - 7.13 (m, 1H), 6.65 (d,  $J = 0.6$  Hz, 1H), 6.55 (s, 1H), 2.26 (s, 3H).

$^{13}\text{C}$  NMR (101 MHz, CHLOROFORM-D)  $\delta$  156.3, 137.4, 137.1, 136.6, 133.6, 133.1, 132.8, 131.3, 129.9, 129.0, 128.4, 128.3(2 $\times$ CH), 128.1(2 $\times$ CH), 127.8, 127.3, 126.7, 126.5, 125.9, 125.5, 125.0, 124.8, 78.9, 21.3.

ESI-HRMS:  $m/z$  calcd for  $\text{C}_{25}\text{H}_{19}\text{NO}$   $[\text{M}+\text{H}]^+$ : 350.1467; found: 350.1467.

GC-MS: 349.

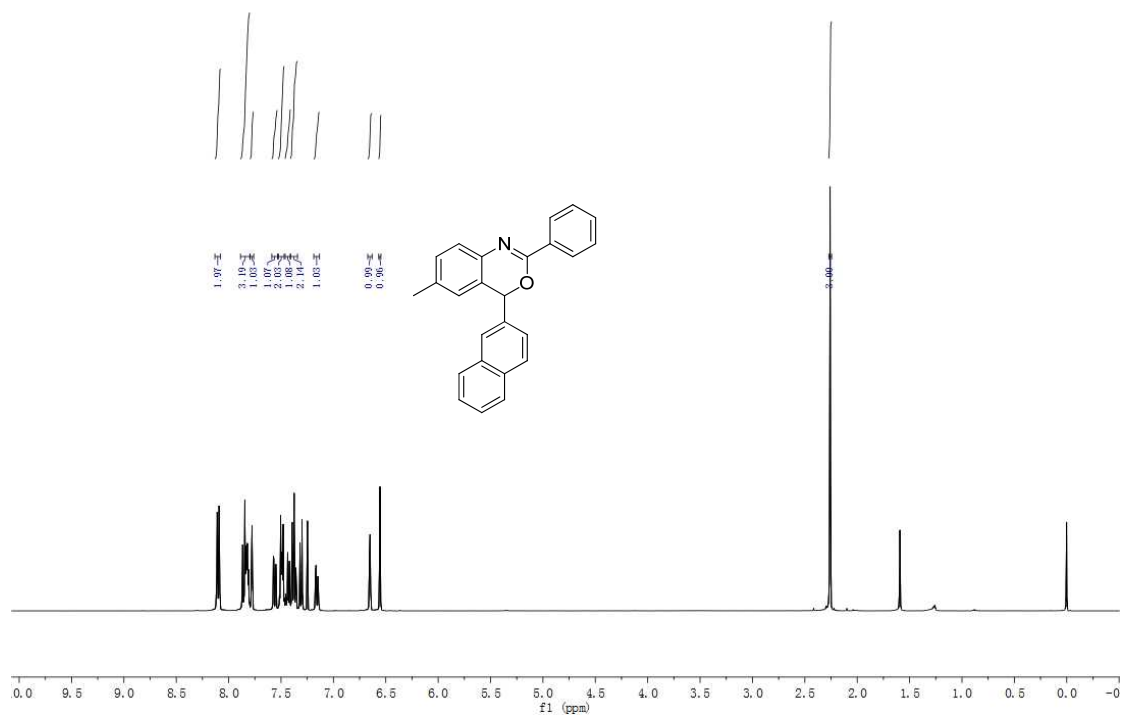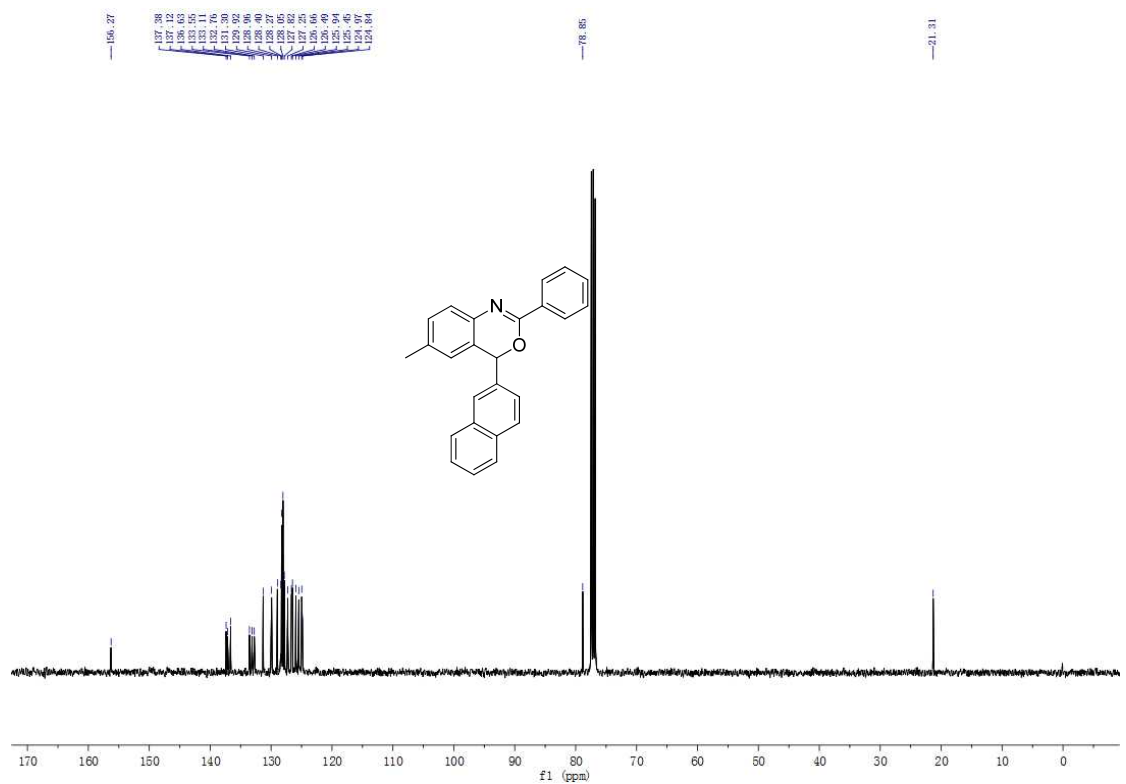

$^1\text{H}$  NMR (400 MHz,  $\text{CDCl}_3$ ) (up) and  $^{13}\text{C}$  NMR (101 MHz,  $\text{CDCl}_3$ ) (down)



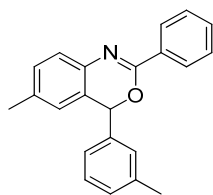

**6-methyl-2-phenyl-4-(m-tolyl)-4H-benzo[d][1,3]oxazine (4aag):** green oil, 89 mg, yield: 57%.

$^1\text{H}$  NMR (400 MHz, CHLOROFORM-D)  $\delta$  8.14 - 8.07 (m, 2H), 7.44 (dt,  $J = 2.7, 2.1$  Hz, 1H), 7.42 - 7.36 (m, 2H), 7.30 - 7.25 (m, 2H), 7.16 (dt,  $J = 9.3, 3.8$  Hz, 4H), 6.63 (d,  $J = 1.0$  Hz, 1H), 6.35 (s, 1H), 2.33 (s, 3H), 2.28 (s, 3H).

$^{13}\text{C}$  NMR (101 MHz, CHLOROFORM-D)  $\delta$  156.3, 140.1, 138.6, 137.0, 136.5, 132.8, 131.3, 130.2, 129.8, 129.7, 128.7, 128.5, 128.3(2 $\times$ CH), 128.1(2 $\times$ CH), 125.8, 125.0, 124.9, 78.7, 21.6, 21.3.

ESI-HRMS:  $m/z$  calcd for  $\text{C}_{22}\text{H}_{19}\text{NO}$   $[\text{M}+\text{H}]^+$ : 314.1467; found: 314.1465.

GC-MS: 313.

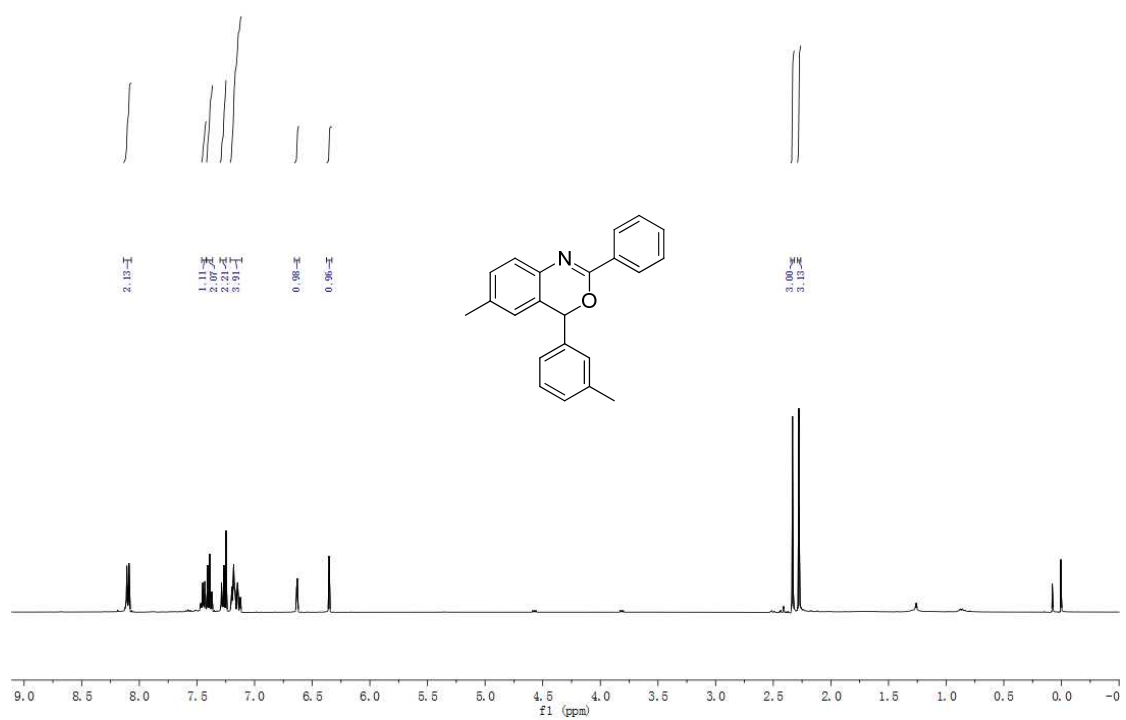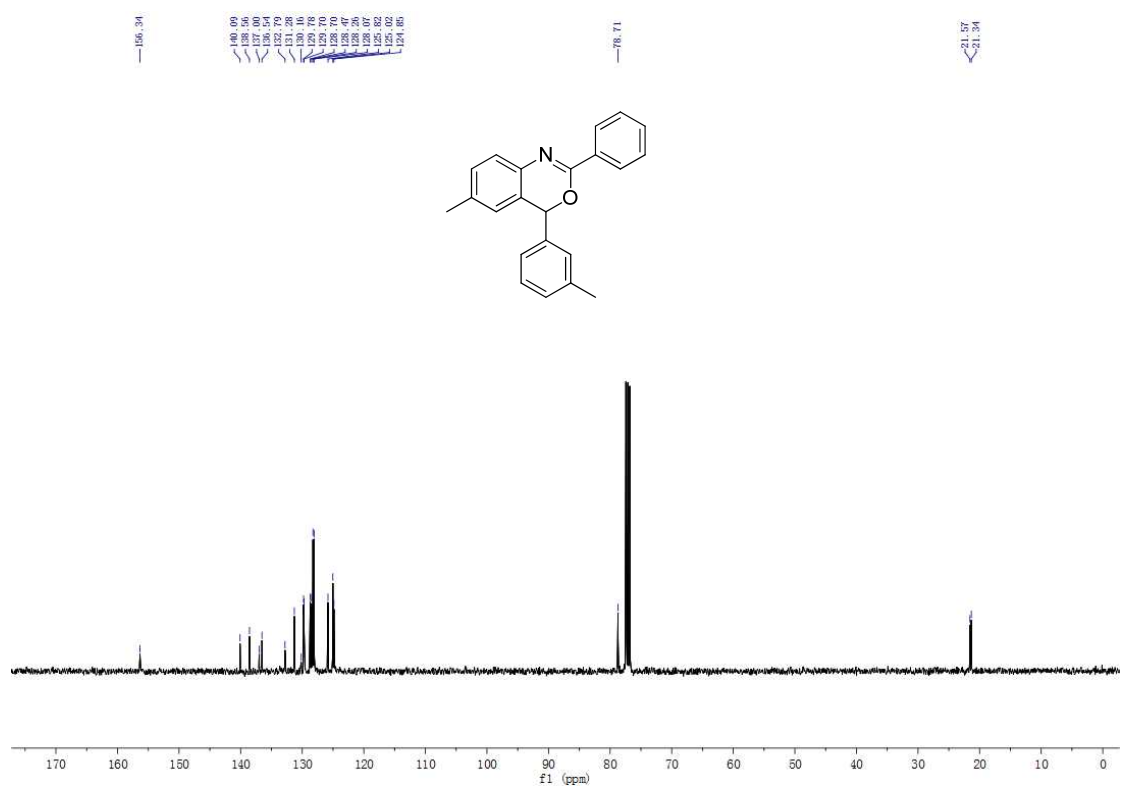

$^1\text{H NMR}$  (400 MHz,  $\text{CDCl}_3$ ) (up) and  $^{13}\text{C NMR}$  (101 MHz,  $\text{CDCl}_3$ ) (down)

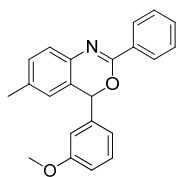

**4-(3-methoxyphenyl)-6-methyl-2-phenyl-4H-benzo[d][1,3]oxazine (4aah):** colorless oil, 84 mg, yield: 51%.

$^1\text{H}$  NMR (400 MHz, CHLOROFORM-D)  $\delta$  8.10 (d,  $J = 7.1$  Hz, 2H), 7.42 (ddd,  $J = 23.5, 10.8, 5.7$  Hz, 3H), 7.29 - 7.23 (m, 2H), 7.13 (d,  $J = 7.5$  Hz, 1H), 6.97 (d,  $J = 7.6$  Hz, 1H), 6.93 (s, 1H), 6.88 (dd,  $J = 8.2, 2.5$  Hz, 1H), 6.66 (s, 1H), 6.35 (s, 1H), 3.75 (s, 3H), 2.28 (s, 3H).

$^{13}\text{C}$  NMR (101 MHz, CHLOROFORM-D)  $\delta$  159.9, 156.2, 141.6, 137.0, 136.6, 132.8, 131.3, 129.9(2 $\times$ CH), 128.3(2 $\times$ CH), 128.1(2 $\times$ CH), 125.8, 124.9, 124.8, 120.1, 114.2, 113.4, 78.4, 55.3, 21.3.

ESI-HRMS:  $m/z$  calcd for  $\text{C}_{22}\text{H}_{10}\text{NO}_2$   $[\text{M}+\text{H}]^+$ :330.1416; found:330.1418.

GC-MS: 329.

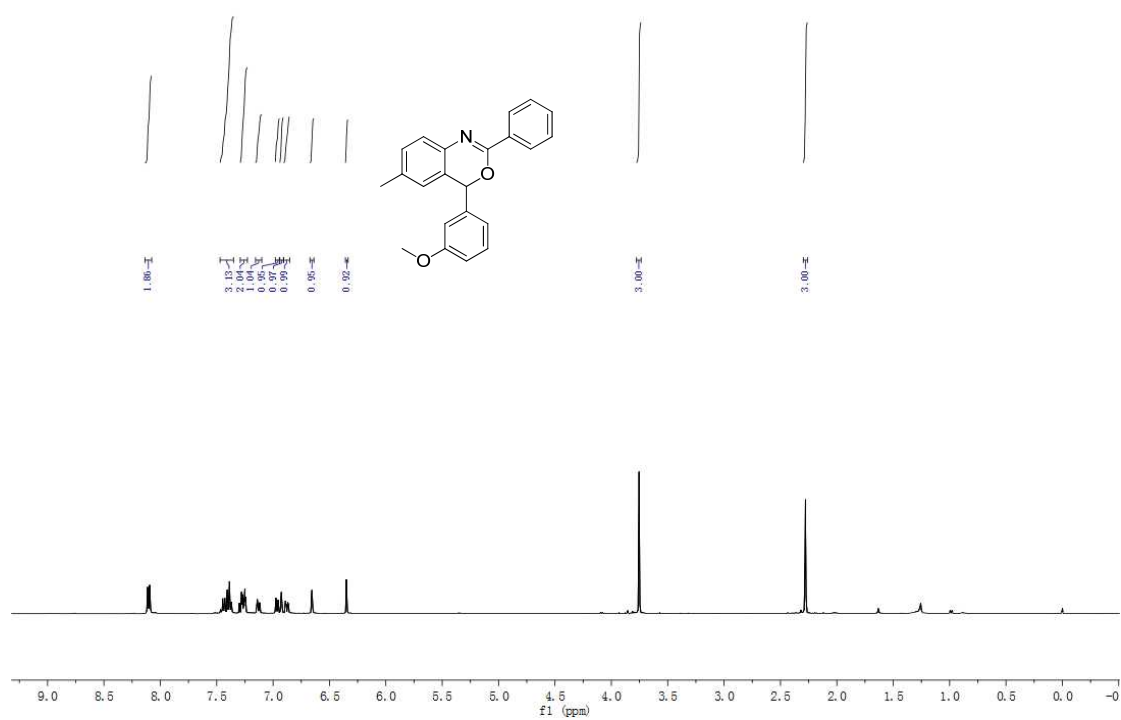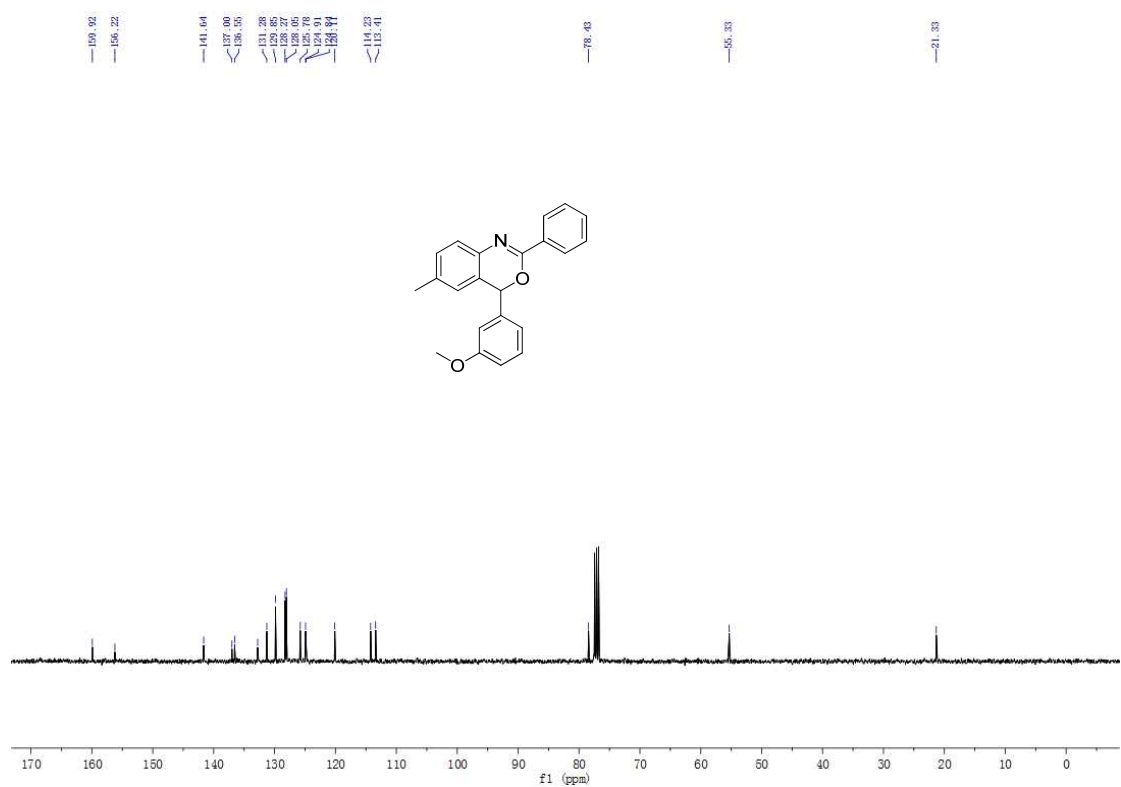

<sup>1</sup>H NMR (400 MHz, CDCl<sub>3</sub>) (up) and <sup>13</sup>C NMR (101 MHz, CDCl<sub>3</sub>) (down)

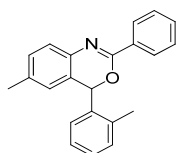

**6-methyl-2-phenyl-4-(o-tolyl)-4H-benzo[d][1,3]oxazine (4aai):** colorless oil, 94 mg, yield: 60%.

$^1\text{H NMR}$  (400 MHz, CHLOROFORM-D)  $\delta$  8.14 - 8.03 (m, 2H), 7.41 (dt,  $J = 14.8, 7.1$  Hz, 3H), 7.28 (t,  $J = 6.6$  Hz, 3H), 7.20 - 7.10 (m, 3H), 6.66 - 6.61 (m, 1H), 6.54 (s, 1H), 2.53 (s, 3H), 2.27 (s, 3H).

$^{13}\text{C NMR}$  (101 MHz, CHLOROFORM-D)  $\delta$  156.5, 137.7, 137.4, 137.0, 136.6, 132.8, 131.2, 131.0, 129.8, 129.0, 128.9, 128.3(2 $\times$ CH), 128.0(2 $\times$ CH), 126.4, 125.47, 124.7, 124.6, 76.2, 21.3, 19.6.

ESI-HRMS:  $m/z$  calcd for  $\text{C}_{22}\text{H}_{19}\text{NO}$   $[\text{M}+\text{H}]^+$ :314.1467; found:314.1469.

GC-MS: 313.

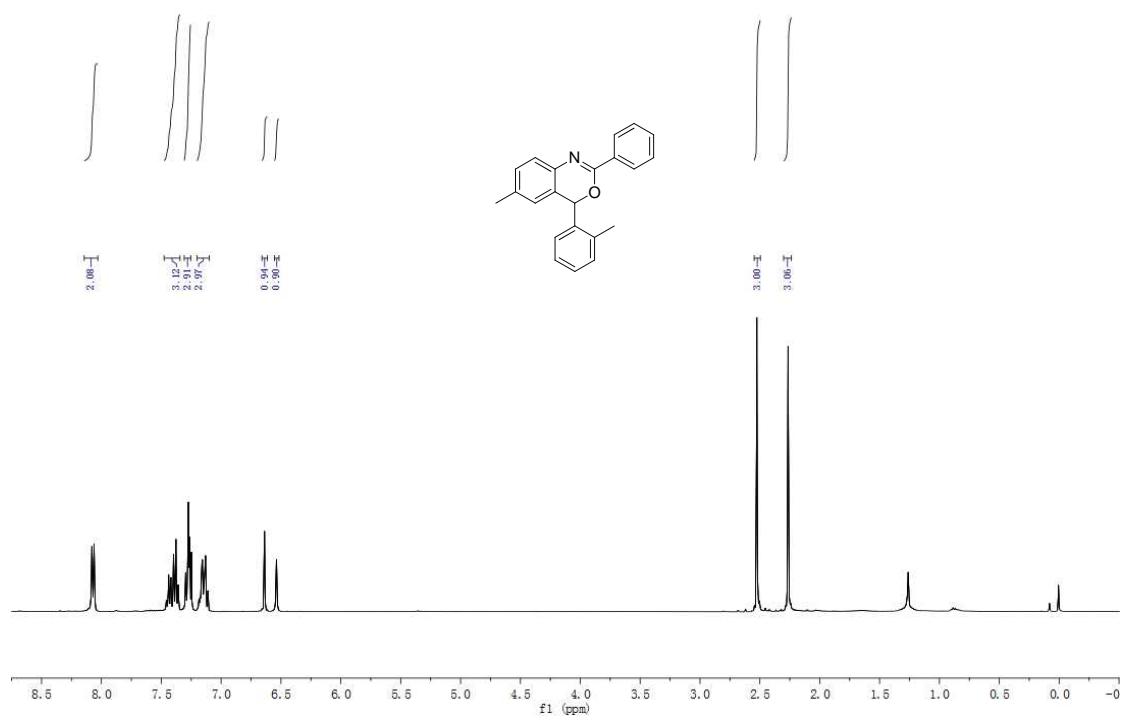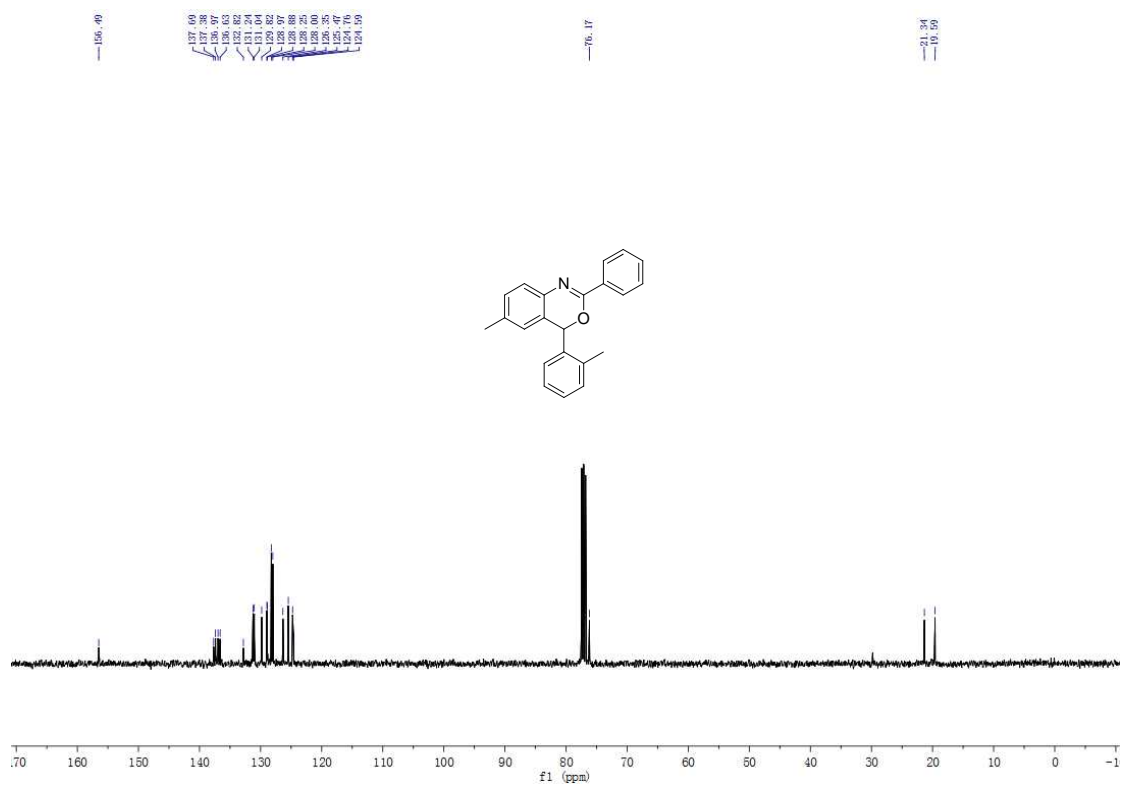

$^1\text{H NMR}$  (400 MHz,  $\text{CDCl}_3$ ) (up) and  $^{13}\text{C NMR}$  (101 MHz,  $\text{CDCl}_3$ ) (down)

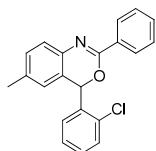

**4-(2-chlorophenyl)-6-methyl-2-phenyl-4H-benzo[d][1,3]oxazine (4aa):** white solid,

135 mg, yield: 81%, melt point: 123 °C.

<sup>1</sup>H NMR (400 MHz, CHLOROFORM-D) δ 8.12 - 8.06 (m, 2H), 7.50 - 7.36 (m, 4H), 7.32 - 7.25 (m, 2H), 7.22 - 7.15 (m, 3H), 6.90 (s, 1H), 6.67 (s, 1H), 2.29 (s, 3H).

<sup>13</sup>C NMR (101 MHz, CHLOROFORM-D) δ 156.2, 137.4, 137.3, 136.8, 133.6, 132.6, 131.4, 130.1(2×CH), 130.0, 129.9, 128.3(2×CH), 128.1(2×CH), 127.4, 125.6, 125.0, 123.7, 74.6, 21.4.

ESI-HRMS: m/z calcd for C<sub>21</sub>H<sub>16</sub>ClNO [M+H]<sup>+</sup>: 334.0920; found: 334.0919.

GC-MS: 333.

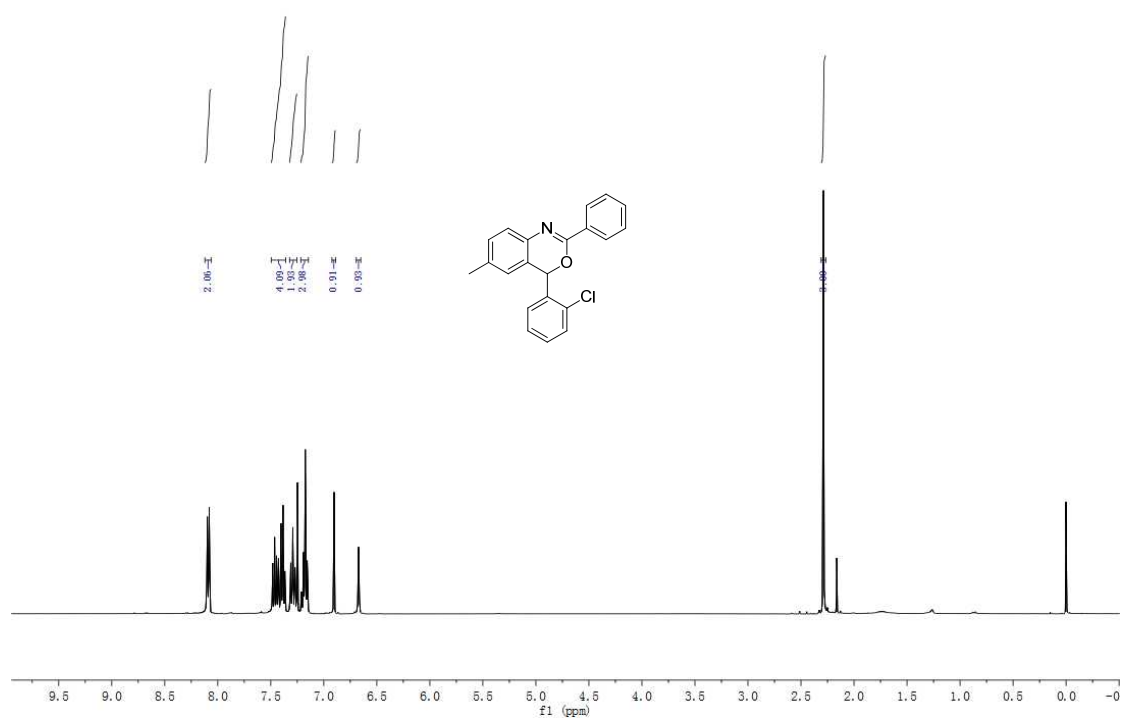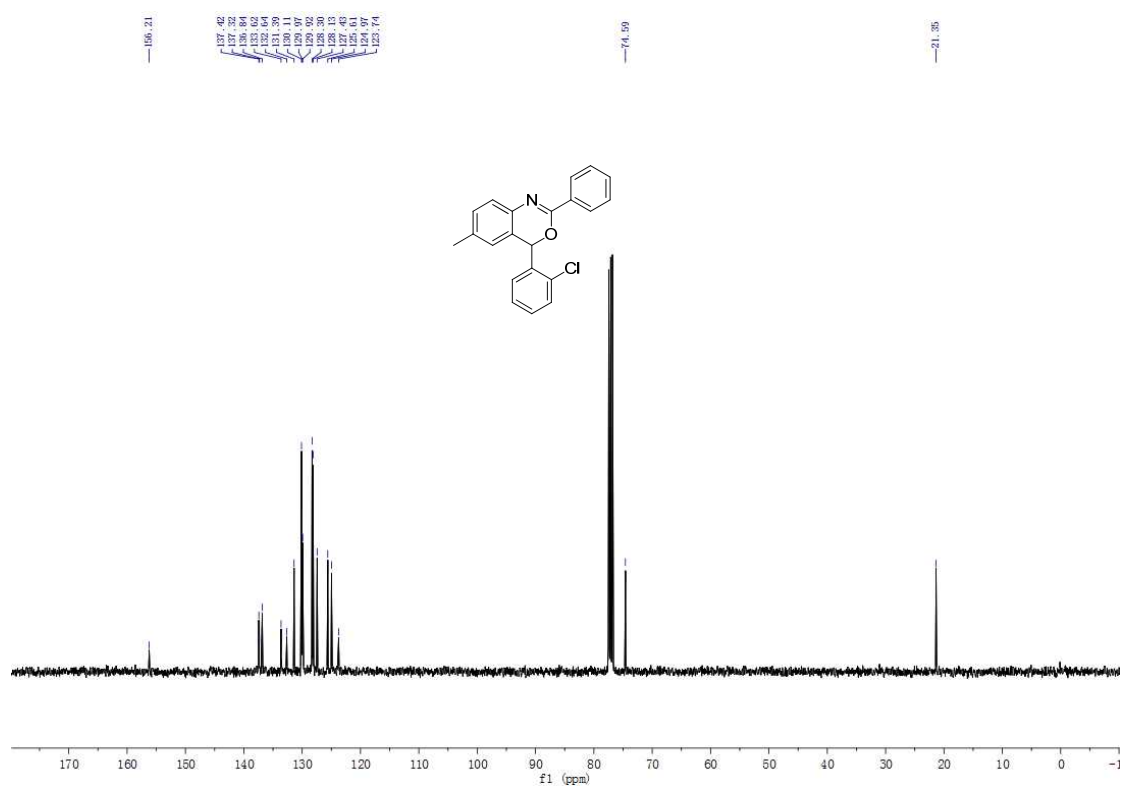

$^1\text{H}$  NMR (400 MHz,  $\text{CDCl}_3$ ) (up) and  $^{13}\text{C}$  NMR (101 MHz,  $\text{CDCl}_3$ ) (down)



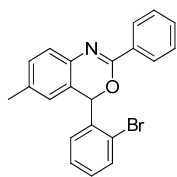

**4-(2-bromophenyl)-6-methyl-2-phenyl-4H-benzo[d][1,3]oxazine (4aak):** colorless oil, 114 mg, yield: 61%.

$^1\text{H}$  NMR (400 MHz, CHLOROFORM-D)  $\delta$  8.10 (dd,  $J = 11.3, 4.2$  Hz, 2H), 7.69 - 7.63 (m, 1H), 7.46 - 7.36 (m, 3H), 7.31 (d,  $J = 8.0$  Hz, 1H), 7.25 - 7.13 (m, 4H), 6.87 (s, 1H), 6.68 (s, 1H), 2.29 (s, 3H).

$^{13}\text{C}$  NMR (101 MHz, CHLOROFORM-D)  $\delta$  156.2, 139.0, 137.3, 136.8, 133.2, 132.6, 131.4, 130.4, 130.3, 130.1, 128.3(2 $\times$ CH), 128.2(2 $\times$ CH), 128.1, 125.7, 125.0, 123.8, 76.8, 21.4.

ESI-HRMS:  $m/z$  calcd for  $\text{C}_{21}\text{H}_{16}\text{BrNO}$   $[\text{M}+\text{H}]^+$ :378.0415; found:378.0420.

GC-MS: 377.

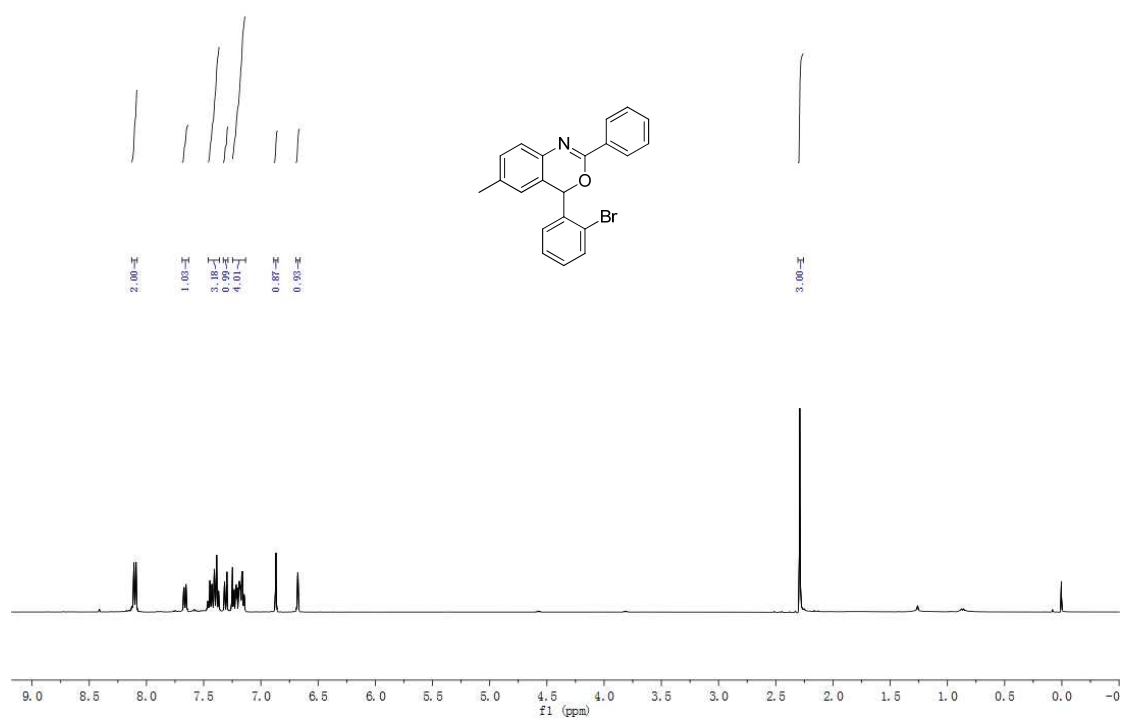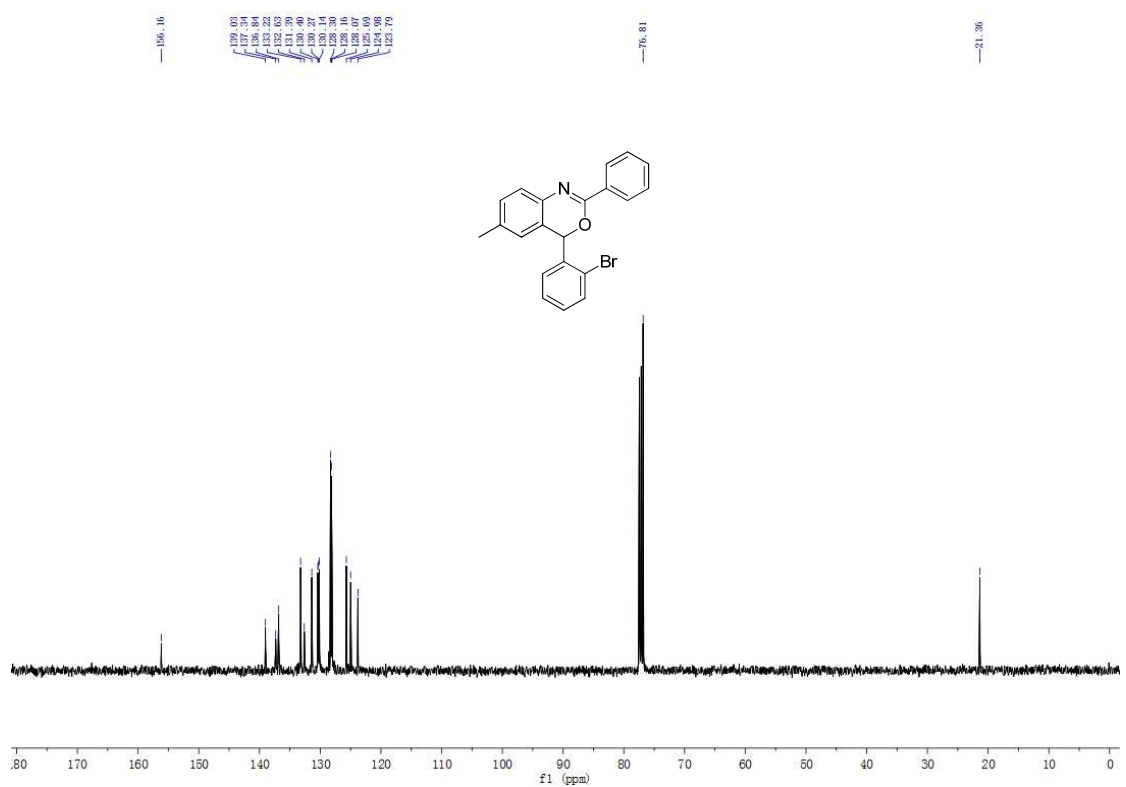

$^1\text{H NMR}$  (400 MHz,  $\text{CDCl}_3$ ) (up) and  $^{13}\text{C NMR}$  (101 MHz,  $\text{CDCl}_3$ ) (down)

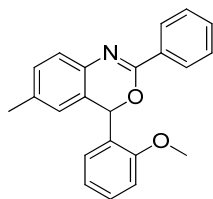

**4-(2-methoxyphenyl)-6-methyl-2-phenyl-4H-benzo[d][1,3]oxazine (4aal):** colorless oil, 122 mg, yield: 74%.

$^1\text{H}$  NMR (400 MHz, CHLOROFORM-D)  $\delta$  8.12 – 8.05 (m, 2H), 7.46 - 7.34 (m, 3H), 7.34 - 7.23 (m, 2H), 7.17 (dd,  $J$  = 7.6, 1.1 Hz, 1H), 7.12 (d,  $J$  = 7.9 Hz, 1H), 6.98 (d,  $J$  = 8.3 Hz, 1H), 6.92 - 6.87 (m, 2H), 6.67 (s, 1H), 3.93 (s, 3H), 2.27 (s, 3H).

$^{13}\text{C}$  (101 MHz, CHLOROFORM-D)  $\delta$  157.0, 156.7, 137.4, 136.4, 133.1, 131.1, 130.0, 129.5, 129.0, 128.8, 128.2(2 $\times$ CH), 128.1(2 $\times$ CH), 125.6, 125.0, 124.7, 121.0, 110.9, 72.6, 55.8, 21.4.

ESI-HRMS:  $m/z$  calcd for  $\text{C}_{22}\text{H}_{19}\text{NO}_2$   $[\text{M}+\text{H}]^+$ :330.1416; found:330.1419.

GC-MS: 329.

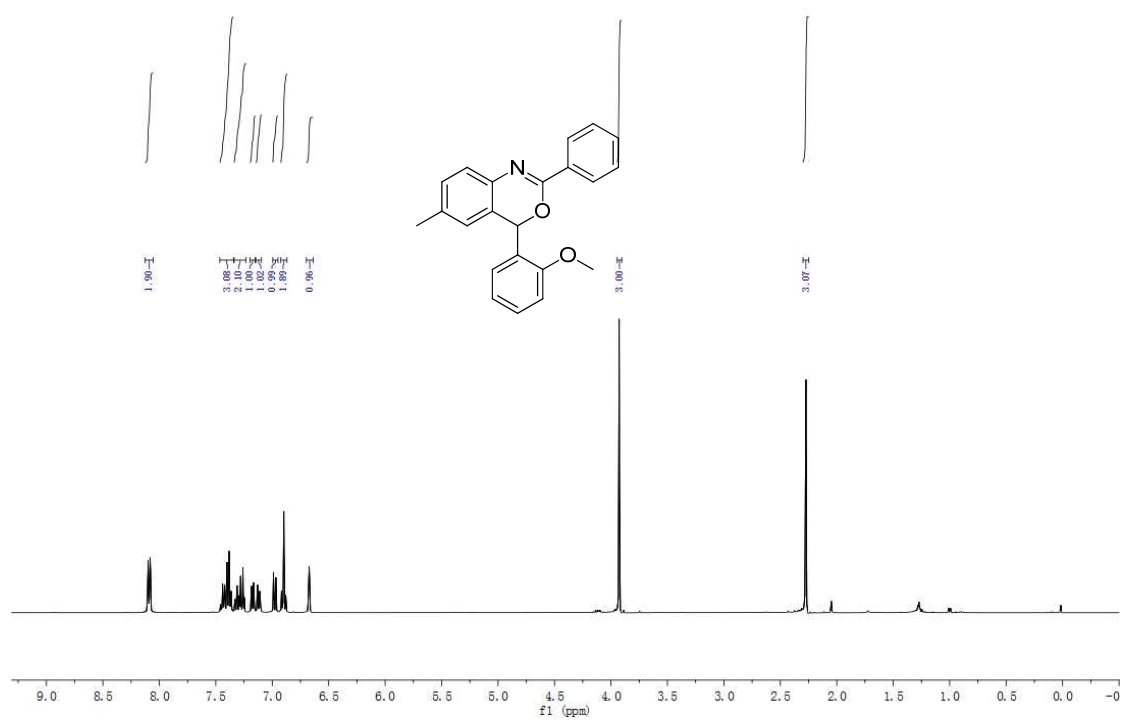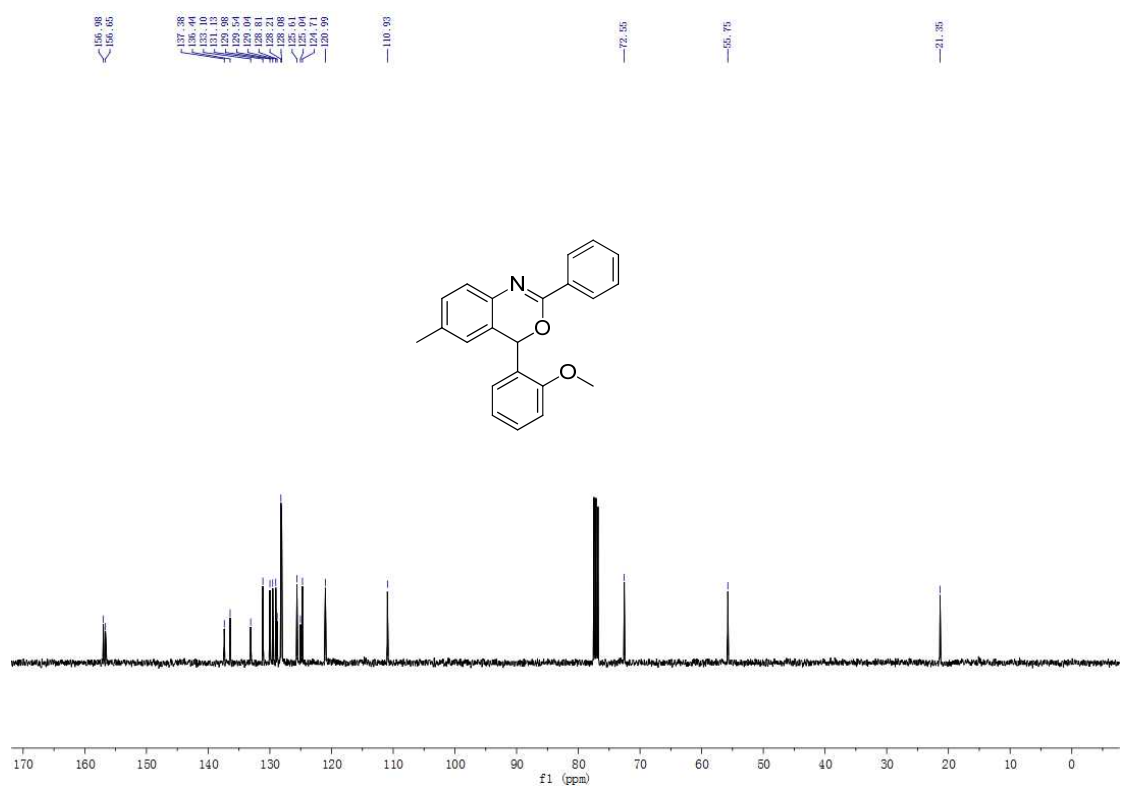

$^1\text{H NMR}$  (400 MHz,  $\text{CDCl}_3$ ) (up) and  $^{13}\text{C NMR}$  (101 MHz,  $\text{CDCl}_3$ ) (down)

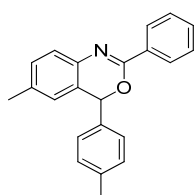

**6-methyl-2-phenyl-4-(p-tolyl)-4H-benzo[d][1,3]oxazine (4aam):** colorless oil, 95.5 mg, yield: 61%.

$^1\text{H}$  NMR (400 MHz, CHLOROFORM-D)  $\delta$  8.14 - 8.07 (m, 2H), 7.45 (ddd,  $J = 6.0, 3.5, 1.3$  Hz, 1H), 7.41 - 7.36 (m, 2H), 7.28 (dd,  $J = 8.1, 2.5$  Hz, 3H), 7.21 - 7.12 (m, 3H), 6.65 (s, 1H), 6.37 (s, 1H), 2.35 (s, 3H), 2.28 (s, 3H).

$^{13}\text{C}$  NMR (101 MHz, CHLOROFORM-D)  $\delta$  156.3, 138.8, 137.3, 137.1, 136.5, 132.9, 131.3, 129.8, 129.5 (2 $\times$ CH), 128.3(2 $\times$ CH), 128.1(2 $\times$ CH), 127.9(2 $\times$ CH), 125.8, 125.13, 124.9, 78.5, 21.3.

ESI-HRMS:  $m/z$  calcd for  $\text{C}_{22}\text{H}_{19}\text{NO}$   $[\text{M}+\text{H}]^+$ :314.1467; found:314.1466.

GC-MS: 313.

yhj  
single\_pulse

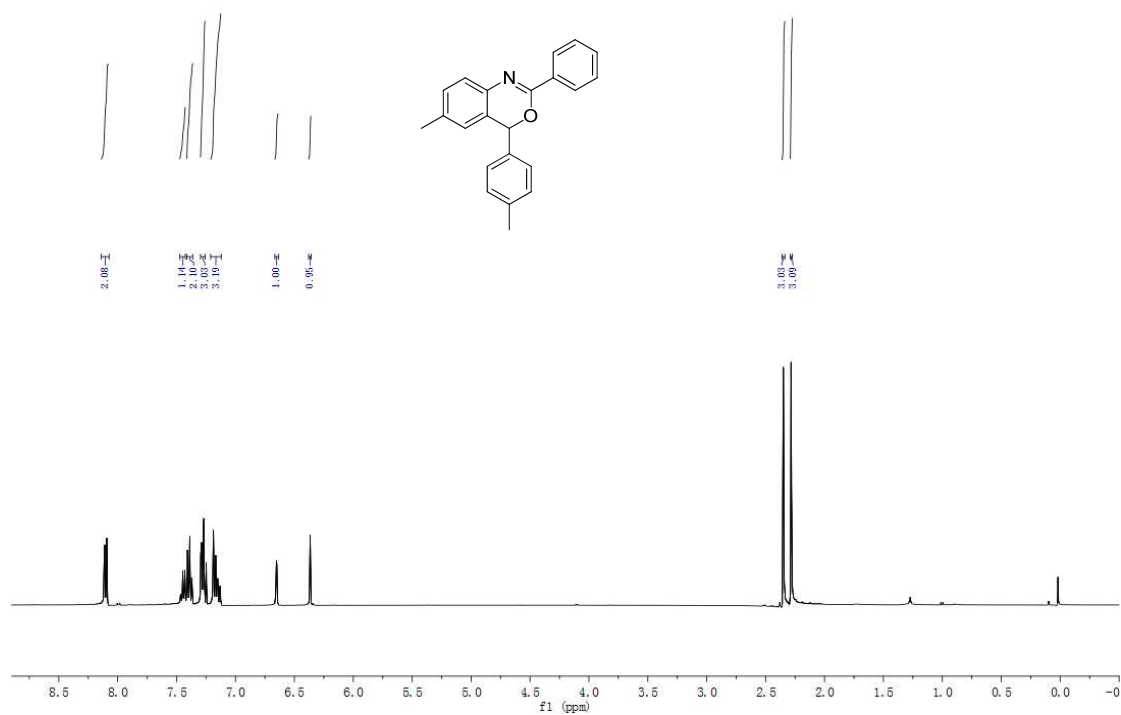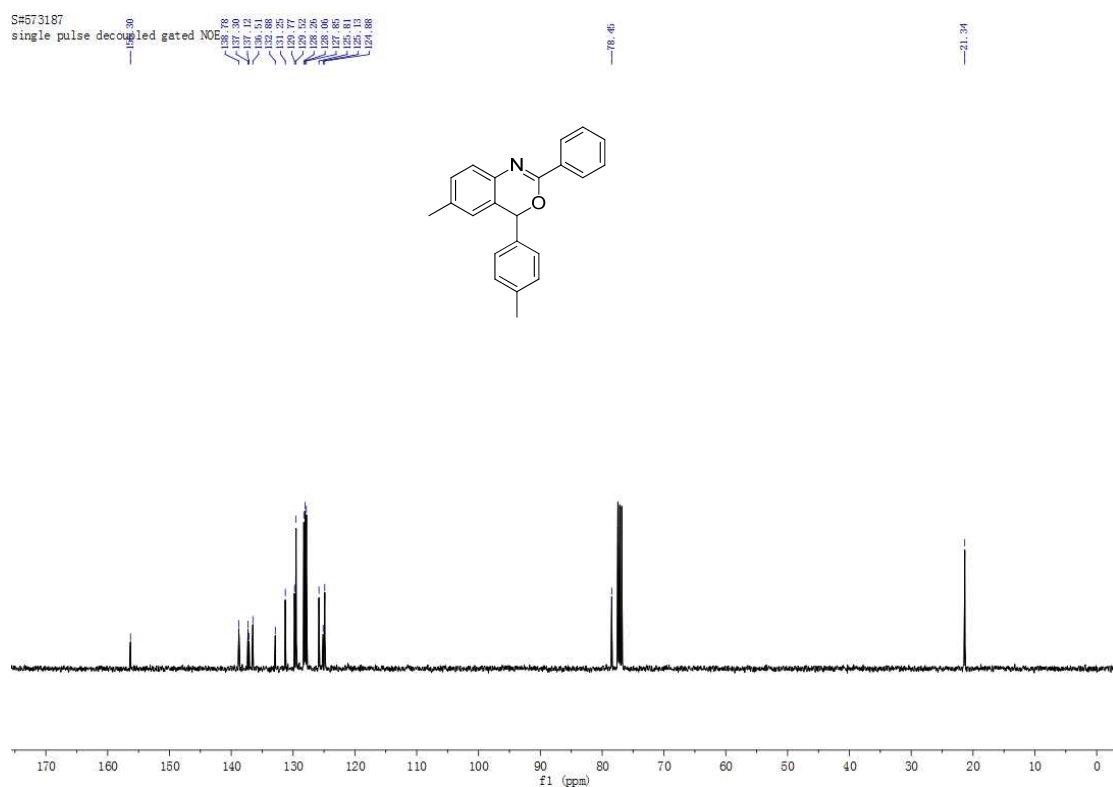

<sup>1</sup>H NMR (400 MHz, CDCl<sub>3</sub>) (up) and <sup>13</sup>C NMR (101 MHz, CDCl<sub>3</sub>) (down)

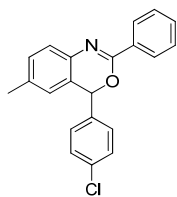

**4-(4-chlorophenyl)-6-methyl-2-phenyl-4H-benzo[d][1,3]oxazine (4aan):** yellow oil, 113 mg, yield: 68%.

$^1\text{H}$  NMR(400 MHz, CHLOROFORM-D)  $\delta$  8.13 – 8.04 (m, 2H), 7.48 - 7.43 (m, 1H), 7.43 - 7.36 (m, 2H), 7.36 - 7.29 (m, 4H), 7.26 (dd,  $J = 9.3, 2.8$  Hz, 1H), 7.16 (d,  $J = 7.8$  Hz, 1H), 6.63 (s, 1H), 6.36 (d,  $J = 2.2$  Hz, 1H), 2.29 (d,  $J = 2.4$  Hz, 3H).

$^{13}\text{C}$  NMR (101 MHz, CHLOROFORM-D)  $\delta$  156.0, 138.6, 137.0, 136.7, 134.8, 132.6, 131.4, 130.1, 129.2(2 $\times$ CH), 129.1(2 $\times$ CH), 128.3(2 $\times$ CH), 128.0(2 $\times$ CH), 125.7, 125.1, 124.4, 77.7, 21.3.

ESI-HRMS:  $m/z$  calcd for  $\text{C}_{21}\text{H}_{16}\text{ClNO}$   $[\text{M}+\text{H}]^+$ :334.0920; found:334.0921.

GC-MS: 333.

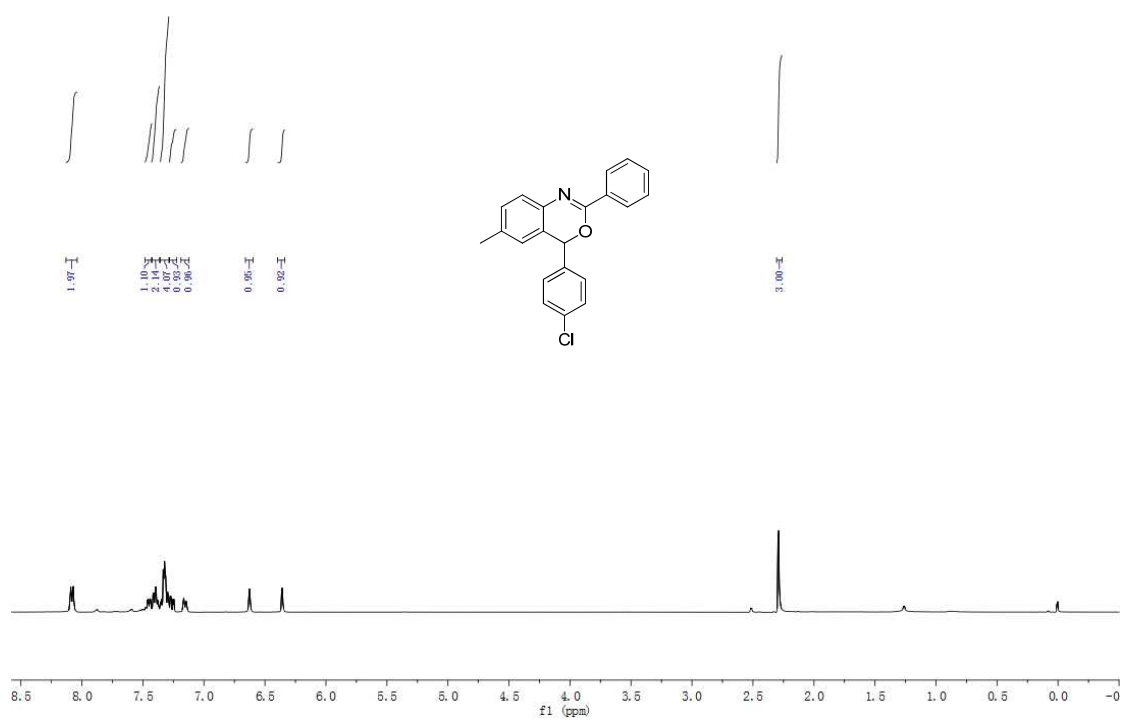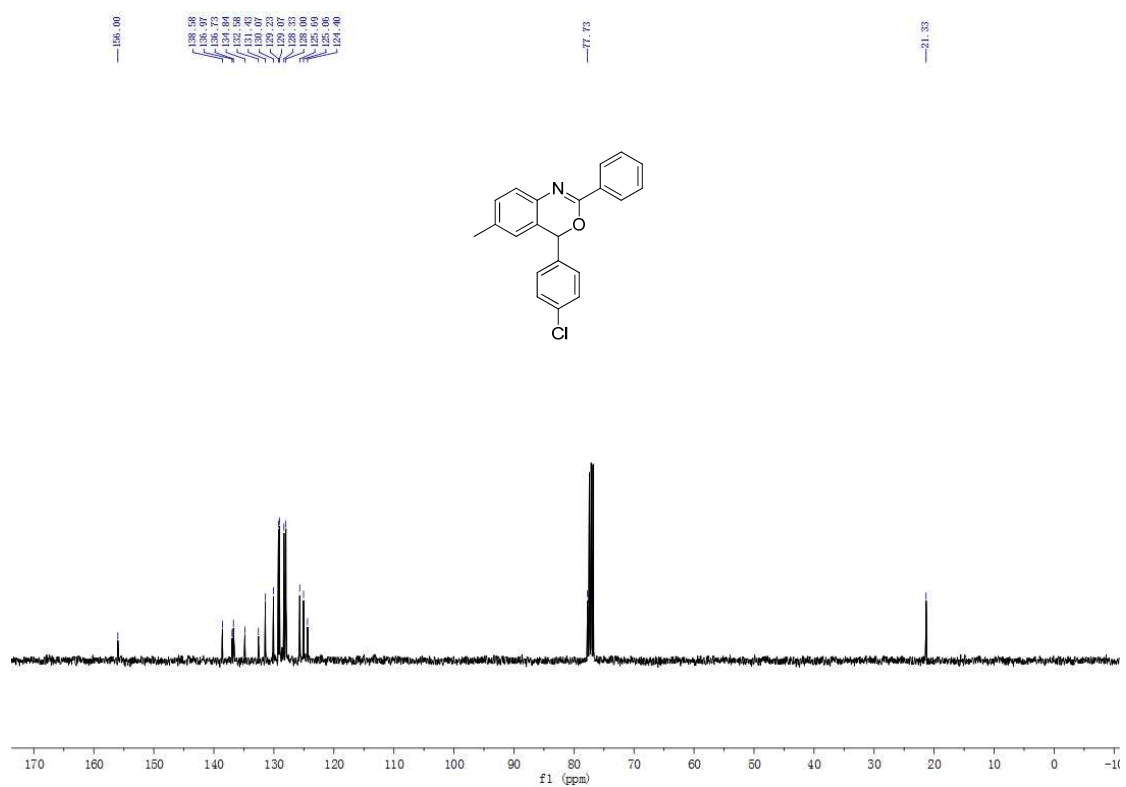

<sup>1</sup>H NMR (400 MHz, CDCl<sub>3</sub>) (up) and <sup>13</sup>C NMR (101 MHz, CDCl<sub>3</sub>) (down)



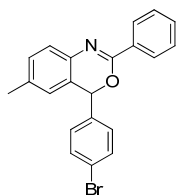

**4-(4-bromophenyl)-6-methyl-2-phenyl-4H-benzo[d][1,3]oxazine (4aao):** white solid, 117 mg, yield: 62%, melt point: 120°C.

$^1\text{H}$  NMR (400 MHz, CHLOROFORM-D)  $\delta$  8.08 (dd,  $J = 5.3, 3.3$  Hz, 2H), 7.51 - 7.47 (m, 2H), 7.47 - 7.43 (m, 1H), 7.39 (dd,  $J = 10.2, 4.6$  Hz, 2H), 7.30 - 7.22 (m, 3H), 7.18 - 7.13 (m, 1H), 6.62 (s, 1H), 6.34 (s, 1H), 2.29 (s, 3H).

$^{13}\text{C}$  NMR (101 MHz, CHLOROFORM-D)  $\delta$  156.0, 139.1, 136.9, 136.8, 132.6, 132.0(2 $\times$ CH), 131.5, 130.1, 129.5(2 $\times$ CH), 128.3(2 $\times$ CH), 128.0(2 $\times$ CH), 125.7, 125.1, 124.3, 123.1, 77.8, 21.4.

ESI-HRMS:  $m/z$  calcd for  $\text{C}_{21}\text{H}_{16}\text{BrNO}$   $[\text{M}+\text{H}]^+$ :378.0415; found:378.0418.

GC-MS: 377.

yhj  
single\_pulse

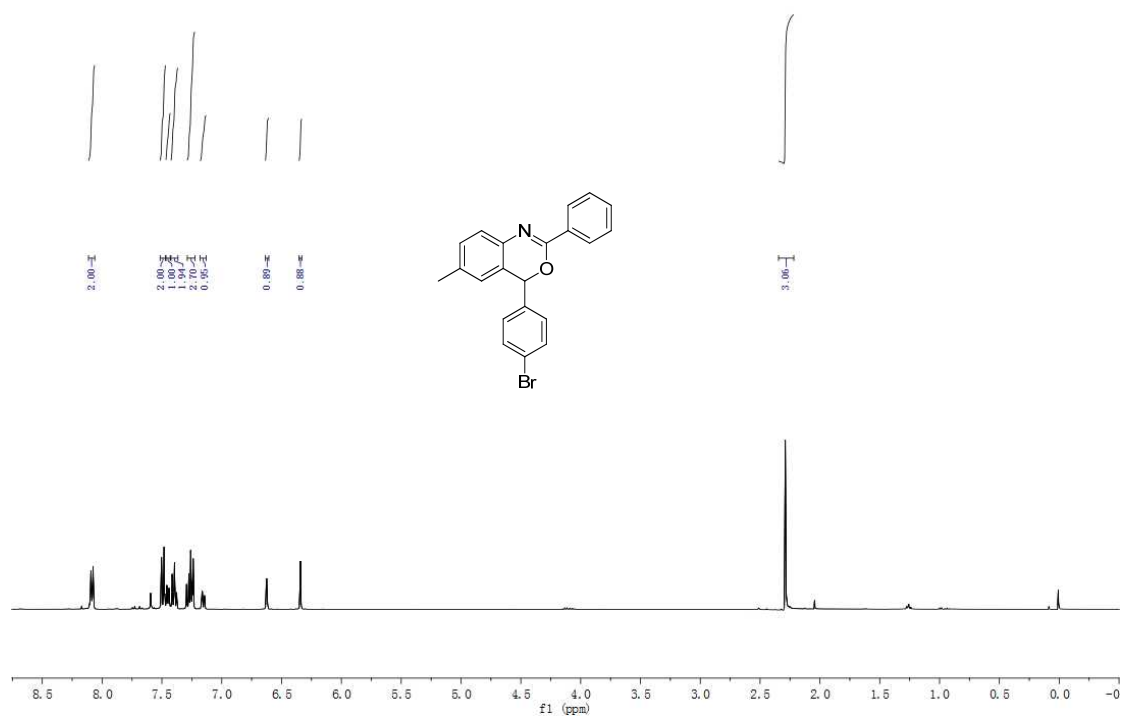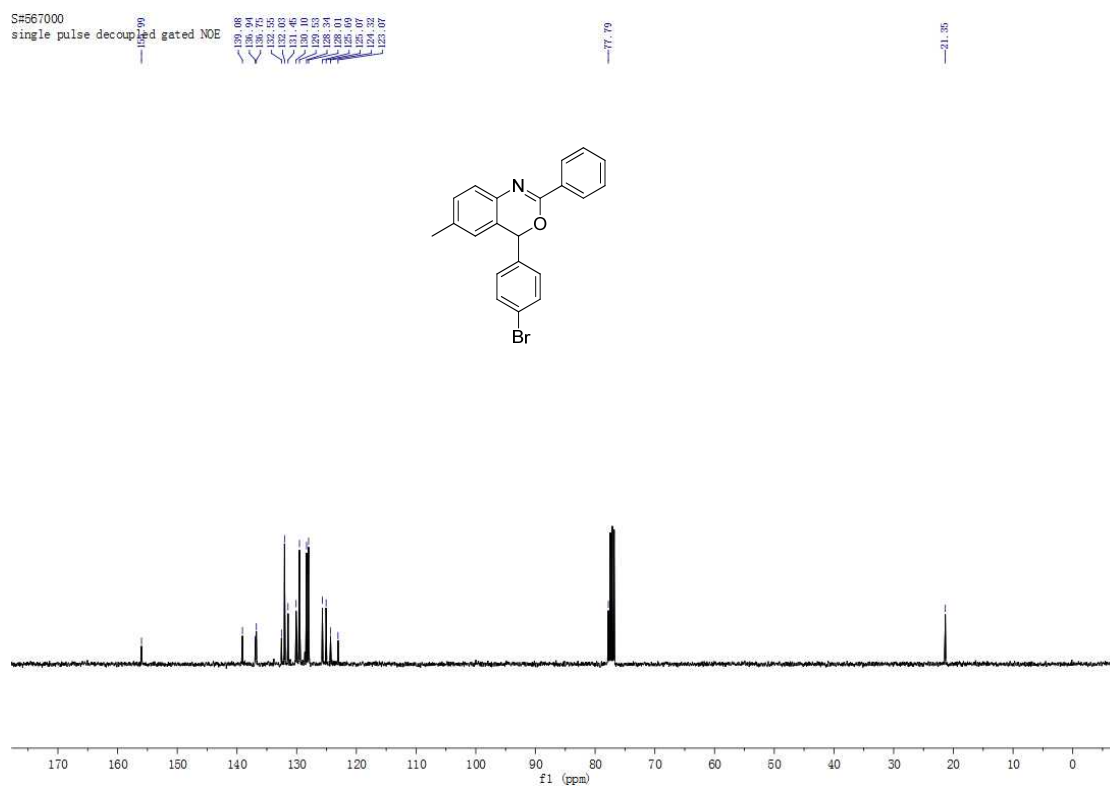

$^1\text{H}$  NMR (400 MHz,  $\text{CDCl}_3$ ) (up) and  $^{13}\text{C}$  NMR (101 MHz,  $\text{CDCl}_3$ ) (down)

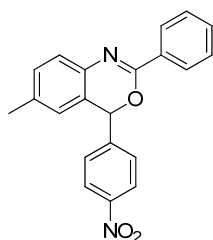

**6-methyl-4-(4-nitrophenyl)-2-phenyl-4H-benzo[d][1,3]oxazine (4aap):** yellow oil, 129 mg, yield: 75%.

$^1\text{H NMR}$  (400 MHz, CHLOROFORM-D)  $\delta$  8.23 - 8.18 (m, 2H), 8.11 - 8.07 (m, 2H), 7.55 (dd,  $J = 9.0, 1.8$  Hz, 2H), 7.50 - 7.44 (m, 1H), 7.44 - 7.38 (m, 2H), 7.29 (d,  $J = 8.0$  Hz, 1H), 7.19 - 7.15 (m, 1H), 6.64 (s, 1H), 6.46 (s, 1H), 2.30 (s, 3H).

$^{13}\text{C NMR}$  (101 MHz, CHLOROFORM-D)  $\delta$  155.6, 148.2, 146.8, 137.1, 136.7, 132.2, 131.7, 130.5, 128.5(2 $\times$ CH), 128.4(2 $\times$ CH), 128.0(2 $\times$ CH), 125.6, 125.4, 124.1(2 $\times$ CH), 123.5, 77.2, 21.3.

ESI-HRMS:  $m/z$  calcd for  $\text{C}_{21}\text{H}_{16}\text{N}_2\text{O}_3$   $[\text{M}+\text{H}]^+$ :345.1161; found:345.1166.

GC-MS: 344.

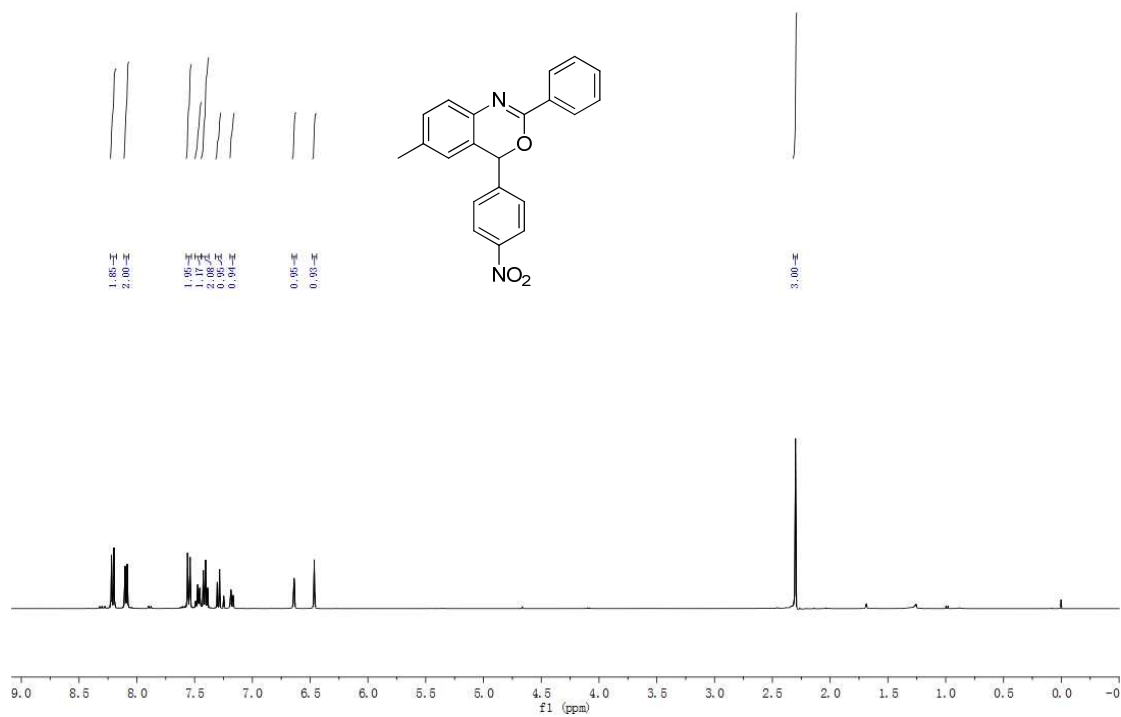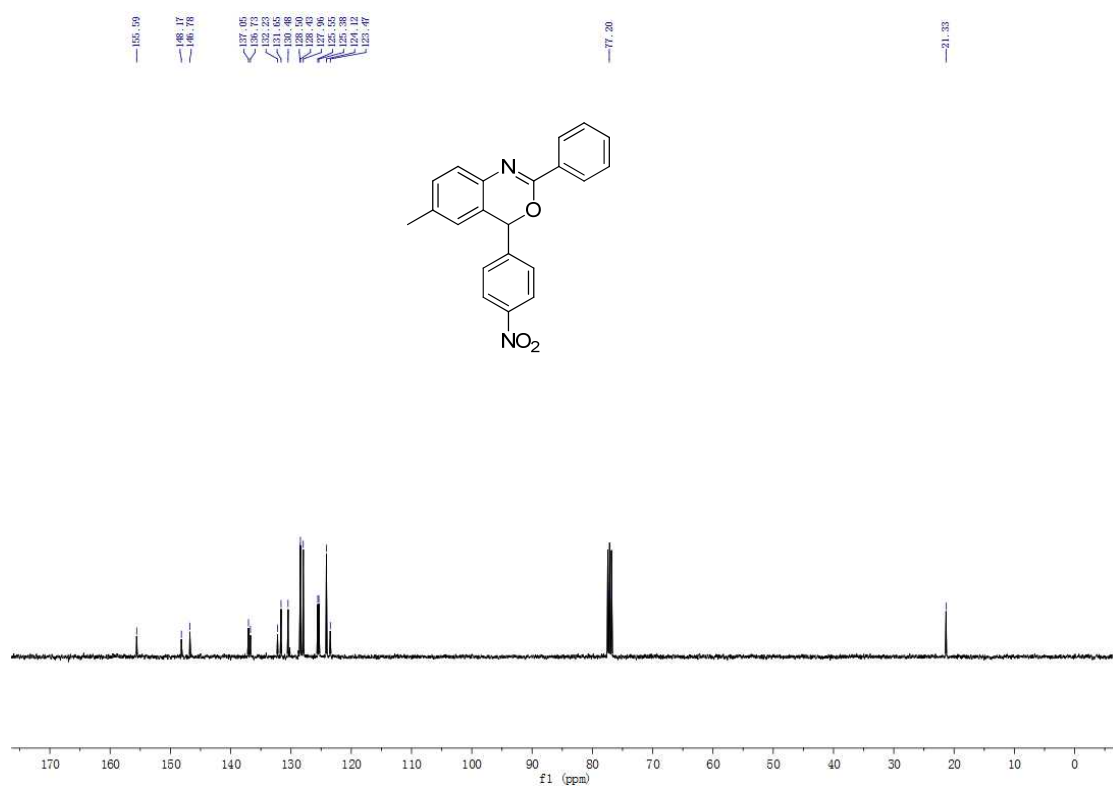

<sup>1</sup>H NMR (400 MHz, CDCl<sub>3</sub>) (up) and <sup>13</sup>C NMR (101 MHz, CDCl<sub>3</sub>) (down)

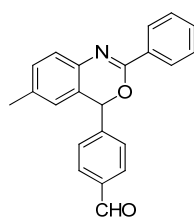

**4-(6-methyl-2-phenyl-4H-benzo[d][1,3]oxazin-4-yl)benzaldehyde (4aaq)**: colorless oil, 116 mg, yield: 71%.

$^1\text{H}$  NMR (400 MHz, CHLOROFORM-D)  $\delta$  10.01 (s, 1H), 8.10 (dd,  $J = 8.3, 1.0$  Hz, 2H), 7.89 (d,  $J = 8.1$  Hz, 2H), 7.56 (d,  $J = 8.1$  Hz, 2H), 7.47 (dd,  $J = 10.5, 4.1$  Hz, 1H), 7.41 (t,  $J = 7.5$  Hz, 2H), 7.29 (d,  $J = 7.9$  Hz, 1H), 7.17 (d,  $J = 7.7$  Hz, 1H), 6.65 (s, 1H), 6.46 (s, 1H), 2.30 (s, 3H).

$^{13}\text{C}$  NMR (101 MHz, CHLOROFORM-D)  $\delta$  191.8, 155.8, 146.3, 136.9, 136.8, 136.6, 132.4, 131.5, 130.3 (3 $\times$ CH), 128.4(2 $\times$ CH), 128.3(2 $\times$ CH), 128.0 (2 $\times$ CH), 125.6, 125.2, 123.9, 77.8, 21.3.

ESI-HRMS:  $m/z$  calcd for  $\text{C}_{22}\text{H}_{17}\text{NO}_2$   $[\text{M}+\text{H}]^+$ :328.1259; found:328.1260.

GC-MS: 327.

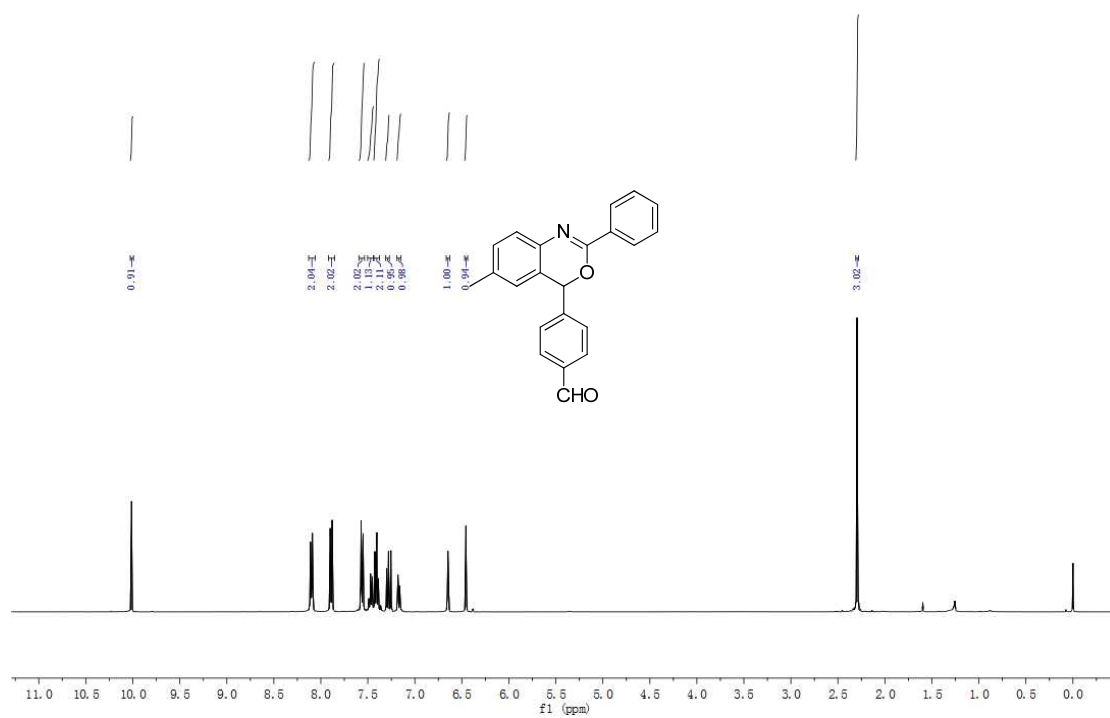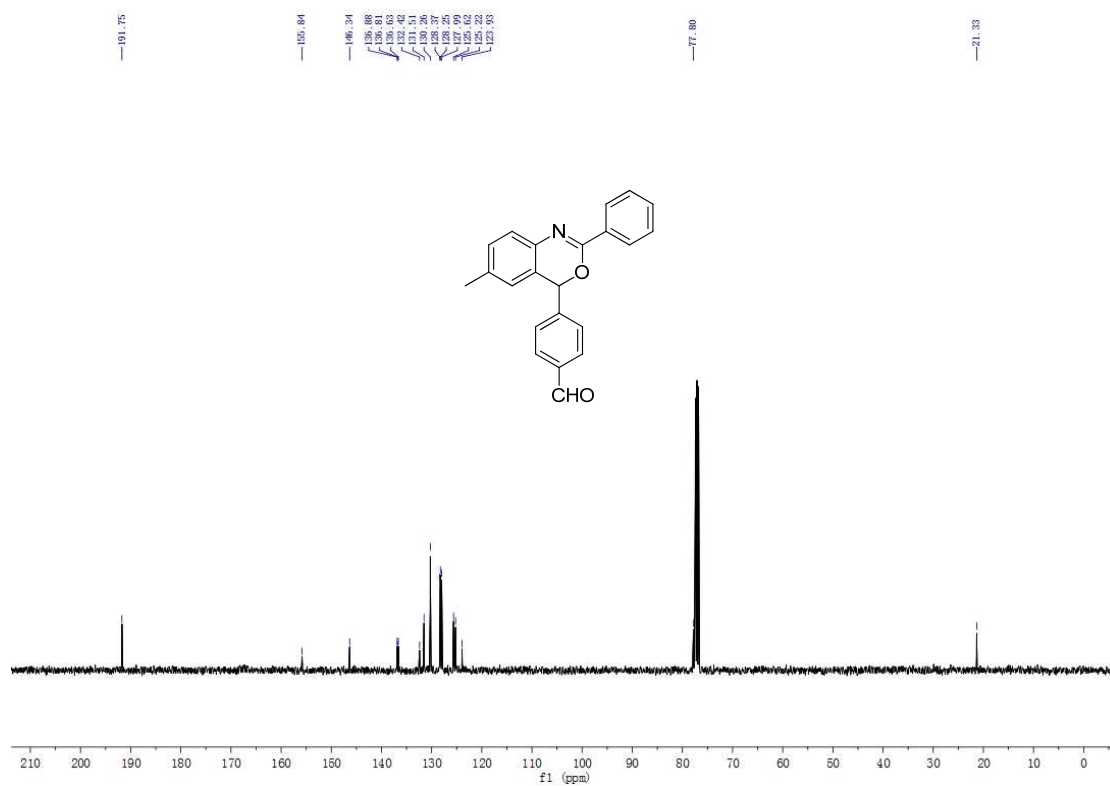

$^1\text{H NMR}$  (400 MHz,  $\text{CDCl}_3$ ) (up) and  $^{13}\text{C NMR}$  (101 MHz,  $\text{CDCl}_3$ ) (down)

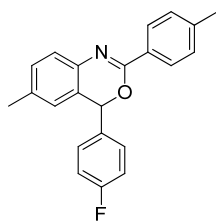

**4-(4-fluorophenyl)-6-methyl-2-(p-tolyl)-4H-benzo[d][1,3]oxazine (4abb):** white solid, 132 mg, yield: 80%, melt point: 118°C.

<sup>1</sup>H NMR (400 MHz, CHLOROFORM-D)  $\delta$  7.98 (d, J = 8.1 Hz, 2H), 7.35 (dd, J = 8.4, 5.5 Hz, 2H), 7.28 (d, J = 7.9 Hz, 1H), 7.20 (d, J = 8.1 Hz, 2H), 7.15 (d, J = 8.1 Hz, 1H), 7.04 (t, J = 8.6 Hz, 2H), 6.63 (s, 1H), 6.35 (s, 1H), 2.38 (s, 3H), 2.29 (s, 3H).

<sup>13</sup>C NMR (101 MHz, CHLOROFORM-D)  $\delta$  163.0 (d, J = 247.5 Hz), 156.2, 141.8, 137.2, 136.4, 136.1 (d, J = 3.1 Hz), 123.0, 129.9, 129.7 (d, J = 8.2 Hz, 2 $\times$ CH), 129.1 (2 $\times$ CH), 128.0(2 $\times$ CH), 125.7, 124.9, 124.7, 115.8(d, J = 21.5 Hz, 2 $\times$ CH), 77.7, 21.6, 21.3.

ESI-HRMS: m/z calcd for C<sub>22</sub>H<sub>18</sub>NO [M+H]<sup>+</sup>:332.1372; found:332.1374.

GC-MS: 331.

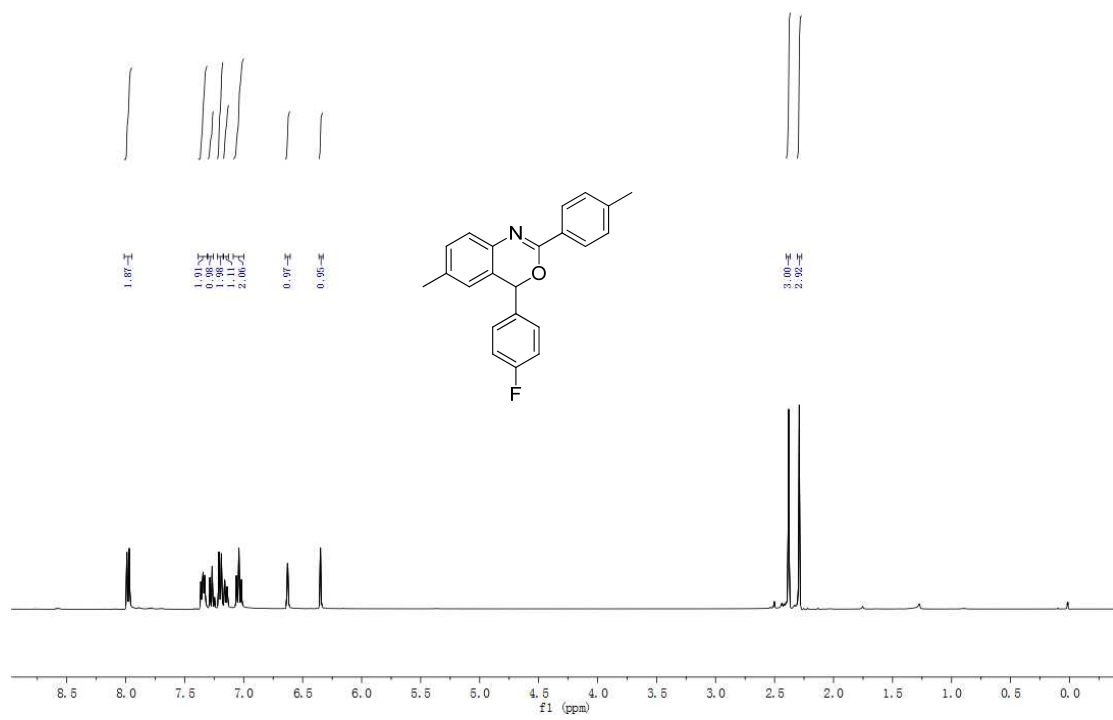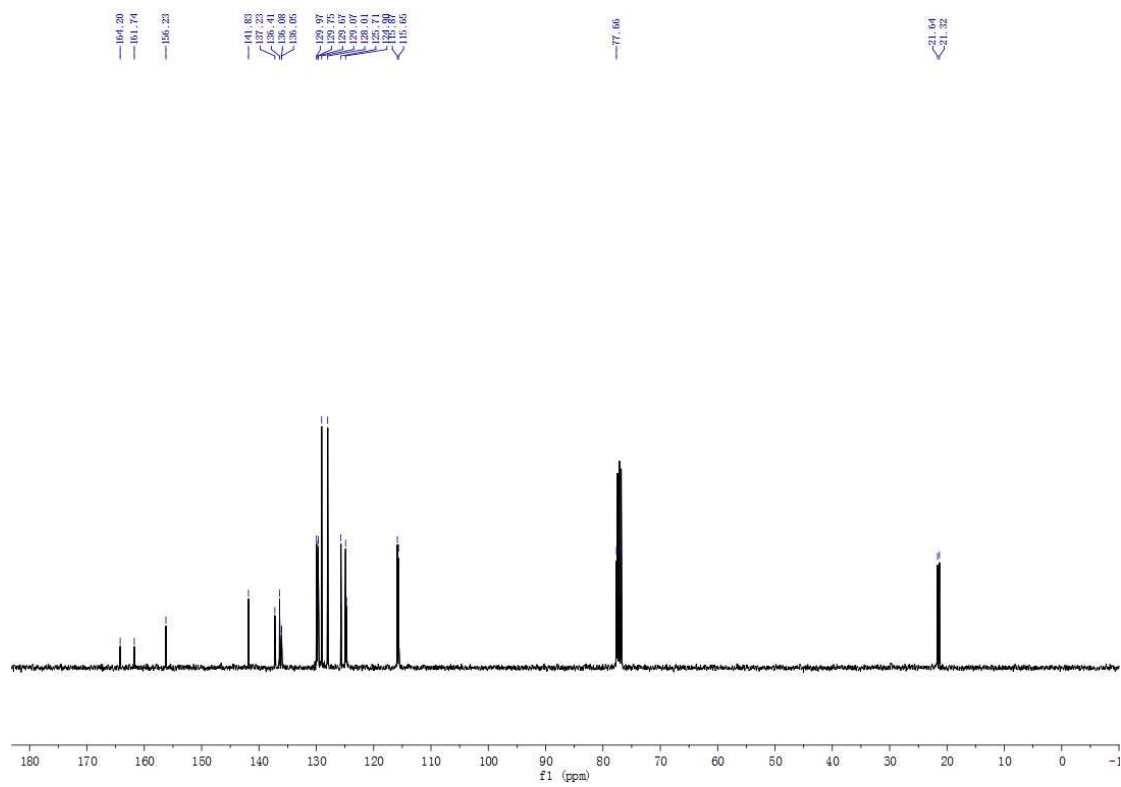

<sup>1</sup>H NMR (400 MHz, CDCl<sub>3</sub>) (up) and <sup>13</sup>C NMR (101 MHz, CDCl<sub>3</sub>) (down)



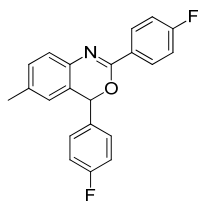

**2,4-bis(4-fluorophenyl)-6-methyl-4H-benzo[d][1,3]oxazine (4acb)**: colorless oil, 157.5 mg, yield: 94%.

$^1\text{H}$  NMR (400 MHz, CHLOROFORM-D)  $\delta$  8.12 - 8.04 (m, 2H), 7.37 - 7.30 (m, 2H), 7.26 (d,  $J$  = 8.1 Hz, 1H), 7.16 - 7.14 (m, 1H), 7.08 - 7.02 (m, 4H), 6.62 (s, 1H), 6.36 (s, 1H), 2.29 (s, 3H).

$^{13}\text{C}$  NMR (101 MHz, CHLOROFORM-D)  $\delta$  164.9 (d,  $J$  = 251.5 Hz), 163.0 (d,  $J$  = 248.0 Hz), 155.2, 137.0, 136.7, 135.9 (d,  $J$  = 2.9 Hz), 130.2 (d,  $J$  = 8.8 Hz, 2 $\times$ CH), 130.1, 129.8 (d,  $J$  = 8.5 Hz, 2 $\times$ CH), 128.9, 128.8, 125.7, 124.9, 124.5, 115.8 (d,  $J$  = 21.6 Hz, 2 $\times$ CH), 115.4 (d,  $J$  = 21.8 Hz, 2 $\times$ CH), 77.9, 21.3.

ESI-HRMS:  $m/z$  calcd for  $\text{C}_{21}\text{H}_{25}\text{F}_2\text{NO}$   $[\text{M}+\text{H}]^+$ : 336.1122; found: 336.1123.

GC-MS: 335.

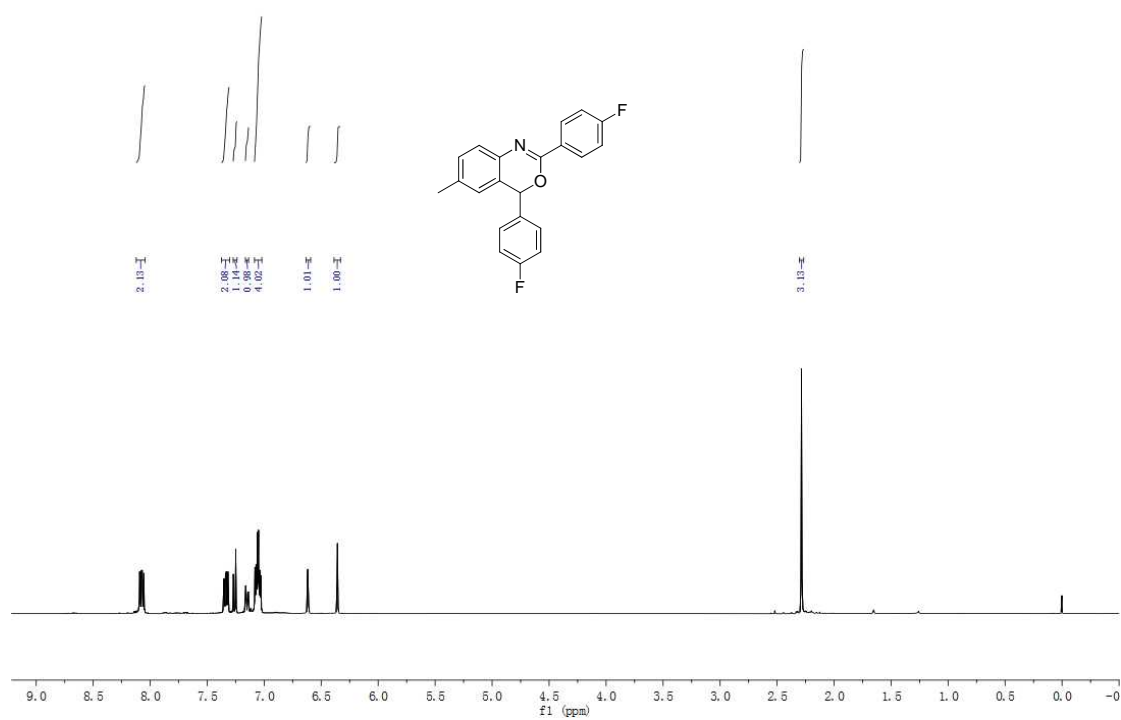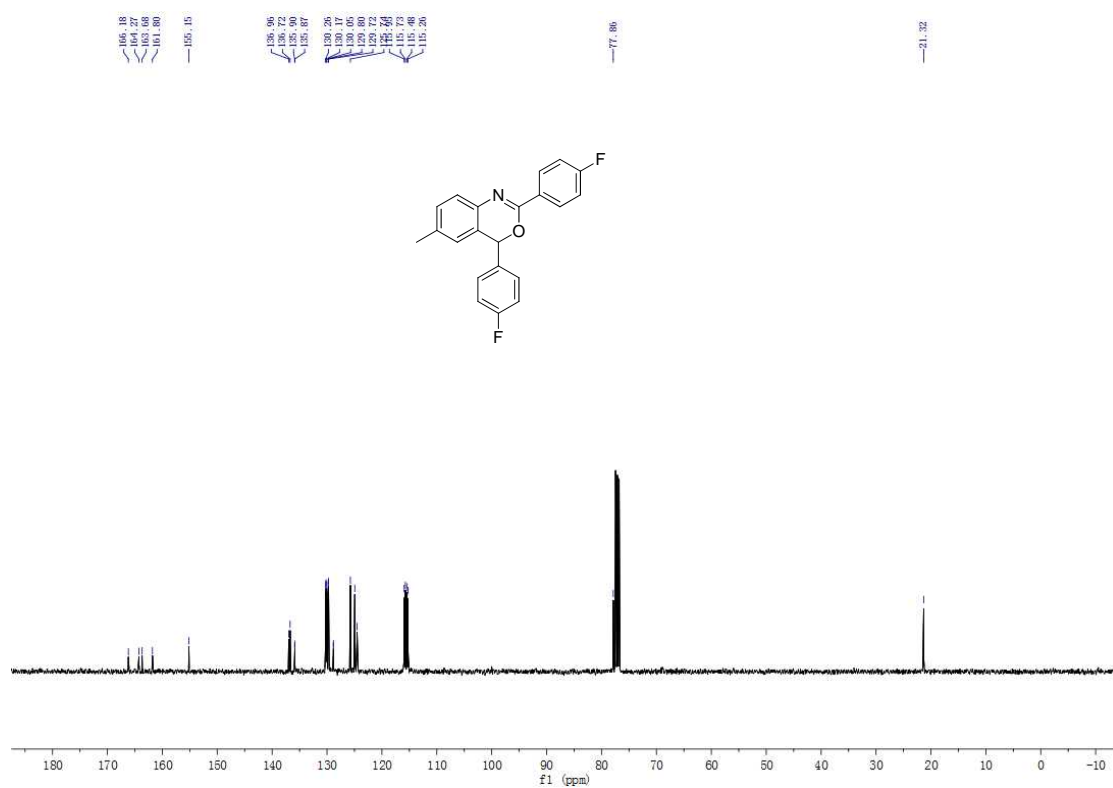

**<sup>1</sup>H NMR (400 MHz, CDCl<sub>3</sub>) (up) and <sup>13</sup>C NMR (101 MHz, CDCl<sub>3</sub>) (down)**

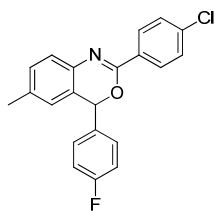

**2-(4-chlorophenyl)-4-(4-fluorophenyl)-6-methyl-4H-benzo[d][1,3]oxazine ( 4adb):**

white solid, 160 mg, yield: 91%, melt point: 128 °C.

$^1\text{H}$  NMR (400 MHz, CHLOROFORM-D)  $\delta$  8.07 - 8.01 (m, 2H), 7.41 - 7.33 (m, 4H), 7.29 (d,  $J = 7.9$  Hz, 1H), 7.18 (dd,  $J = 10.6, 3.5$  Hz, 1H), 7.10 - 7.04 (m, 2H), 6.64 (s, 1H), 6.38 (s, 1H), 2.31 (s, 3H).

$^{13}\text{C}$  NMR (101 MHz, CHLOROFORM-D)  $\delta$  163.0 (d,  $J = 248.1$  Hz), 155.1, 137.6, 136.9, 136.9, 135.9 (d,  $J = 3.0$  Hz), 131.2, 130.1, 129.8 (d,  $J = 8.4$  Hz, 2 $\times$ CH), 129.3 (2 $\times$ CH), 128.6 (2 $\times$ CH), 125.8, 125.1, 124.6, 115.9 (d,  $J = 21.6$  Hz, 2 $\times$ CH), 77.9, 21.3.

ESI-HRMS:  $m/z$  calcd for  $\text{C}_{21}\text{H}_{15}\text{ClNO}$   $[\text{M}+\text{H}]^+$ : 352.0826; found: 352.0828.

GC-MS: 351.

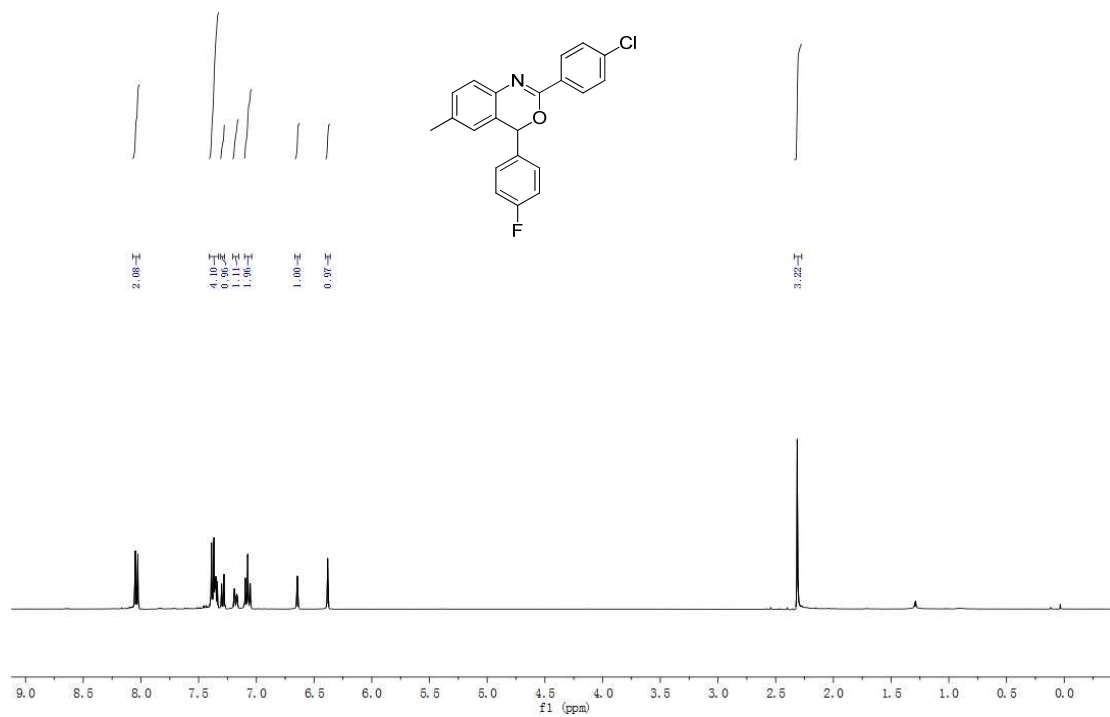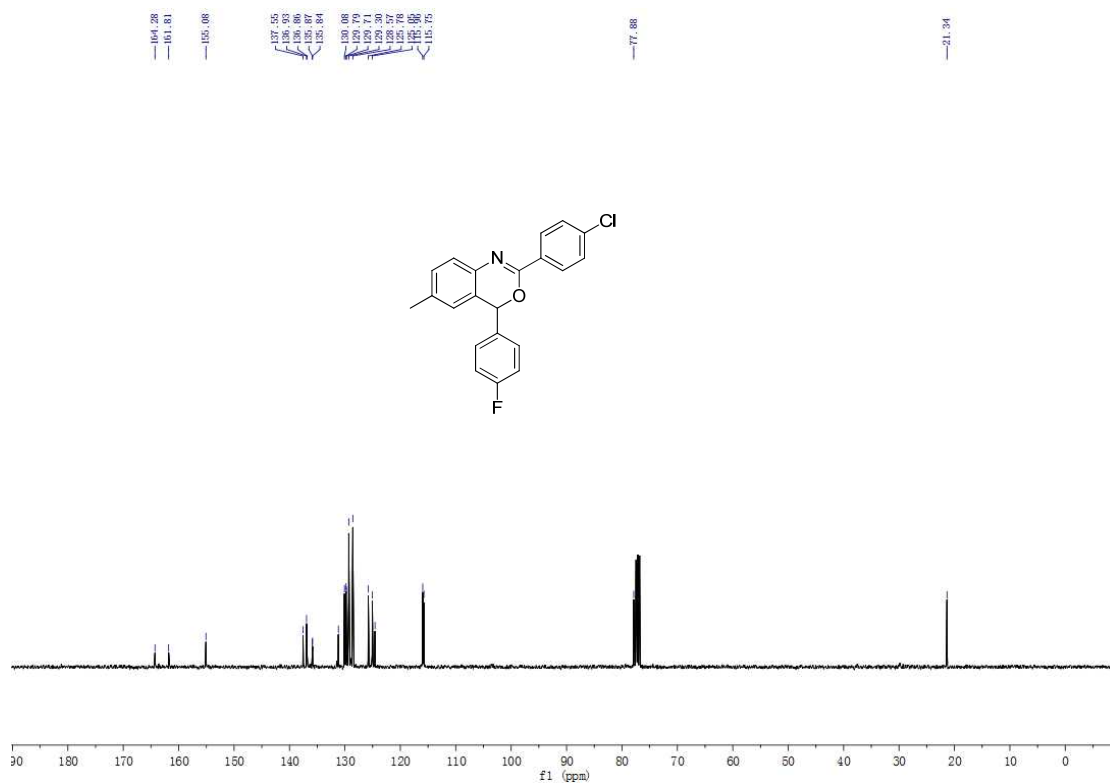

<sup>1</sup>H NMR (400 MHz, CDCl<sub>3</sub>) (up) and <sup>13</sup>C NMR (101 MHz, CDCl<sub>3</sub>) (down)

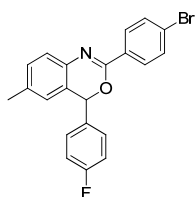

**2-(4-bromophenyl)-4-(4-fluorophenyl)-6-methyl-4H-benzo[d][1,3]oxazine (4aeb):**

white solid, 182 mg, yield: 92%, melt point: 153 °C.

$^1\text{H}$  NMR (400 MHz, CHLOROFORM-D)  $\delta$  7.94 (d,  $J$  = 8.4 Hz, 2H), 7.51 (d,  $J$  = 8.4 Hz, 2H), 7.33 (dd,  $J$  = 8.3, 5.5 Hz, 2H), 7.26 (d,  $J$  = 7.2 Hz, 1H), 7.15 (d,  $J$  = 7.9 Hz, 1H), 7.05 (t,  $J$  = 8.6 Hz, 2H), 6.62 (s, 1H), 6.36 (s, 1H), 2.29 (s, 3H).

$^{13}\text{C}$  NMR (101 MHz, CHLOROFORM-D)  $\delta$  163.0 (d,  $J$  = 248.0 Hz), 155.2, 137.0, 136.8, 135.8 (d,  $J$  = 2.8 Hz), 131.6, 131.5, 130.1, 129.7 (d,  $J$  = 8.5 Hz, 2 $\times$ CH), 129.5, 126.1, 125.8, 125.1, 124.6, 115.9 (d,  $J$  = 21.7 Hz, 2 $\times$ CH), 77.9, 21.3.

ESI-HRMS:  $m/z$  calcd for  $\text{C}_{21}\text{H}_{15}\text{BrNO}$   $[\text{M}+\text{H}]^+$ : 396.0321; found: 396.0322.

GC-MS: 395.

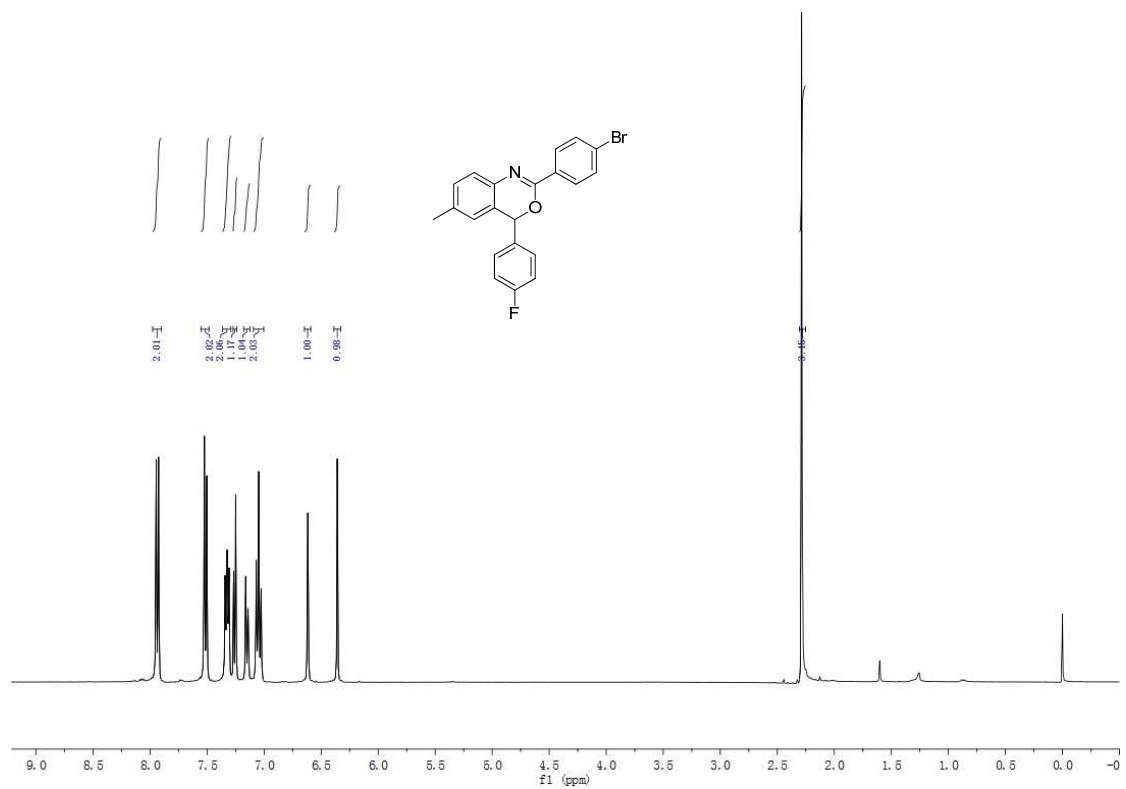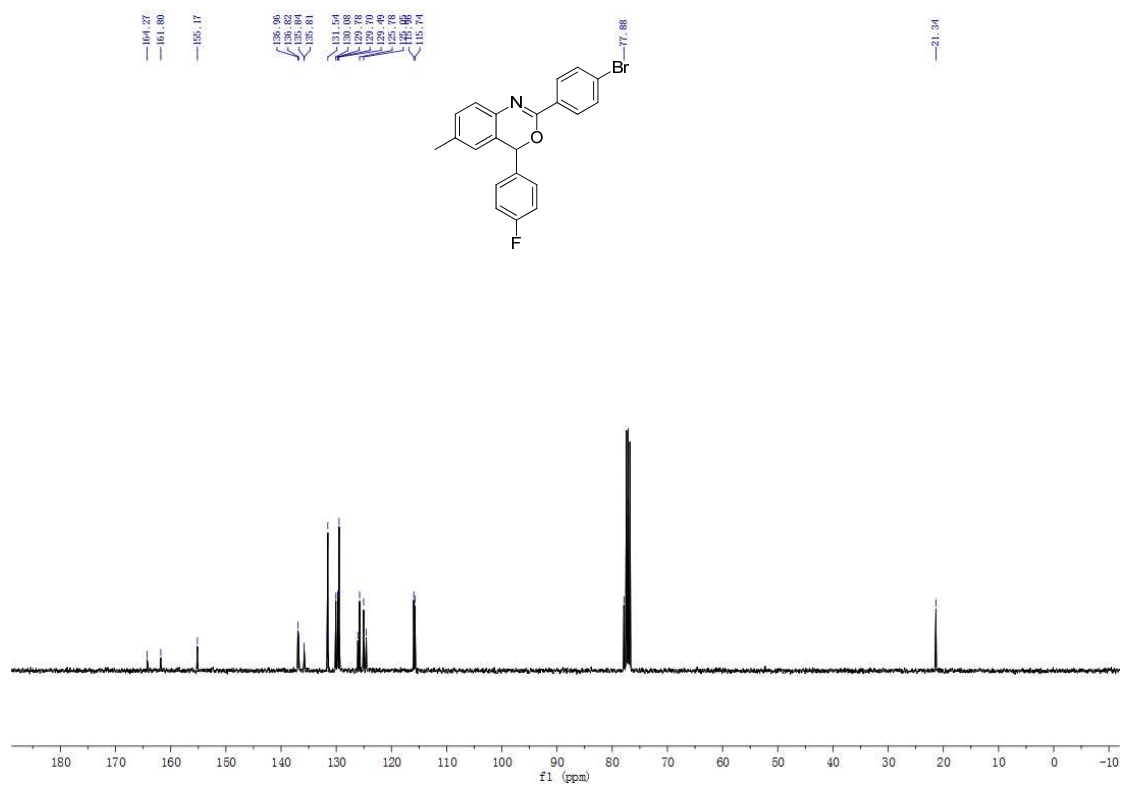

<sup>1</sup>H NMR (400 MHz, CDCl<sub>3</sub>) (up) and <sup>13</sup>C NMR (101 MHz, CDCl<sub>3</sub>) (down)

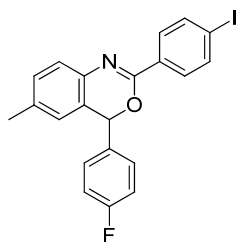

**6-methyl-2-phenyl-4-(p-tolyl)-4H-benzo[d][1,3]oxazine (4afb):** white solid, 195 mg, yield: 88%, melt point: 157°C.

$^1\text{H}$  NMR (400 MHz, CHLOROFORM-D)  $\delta$  7.83 - 7.76 (m, 2H), 7.72 (d,  $J = 8.4$  Hz, 2H), 7.32 (dd,  $J = 8.5, 5.5$  Hz, 2H), 7.26 (d,  $J = 8.0$  Hz, 1H), 7.15 (d,  $J = 7.9$  Hz, 1H), 7.08 - 7.00 (m, 2H), 6.62 (s, 1H), 6.35 (s, 1H), 2.28 (s, 3H).

$^{13}\text{C}$  NMR (101 MHz, CHLOROFORM-D)  $\delta$  163.0 (d,  $J = 248.2$  Hz), 155.3, 137.5(2 $\times$ CH), 137.0, 136.8, 135.9 (d,  $J = 3.3$  Hz), 132.2, 130.1, 129.7 (d,  $J = 8.5$  Hz, 2 $\times$ CH), 129.5(2 $\times$ CH), 125.8, 125.1, 124.6, 115.9 (d,  $J = 21.7$  Hz, 2 $\times$ CH), 98.5, 77.9, 21.4.

ESI-HRMS:  $m/z$  calcd for  $\text{C}_{21}\text{H}_{15}\text{FINO}$   $[\text{M}+\text{H}]^+$ :444.0182; found:444.0182.

GC-MS: 443.

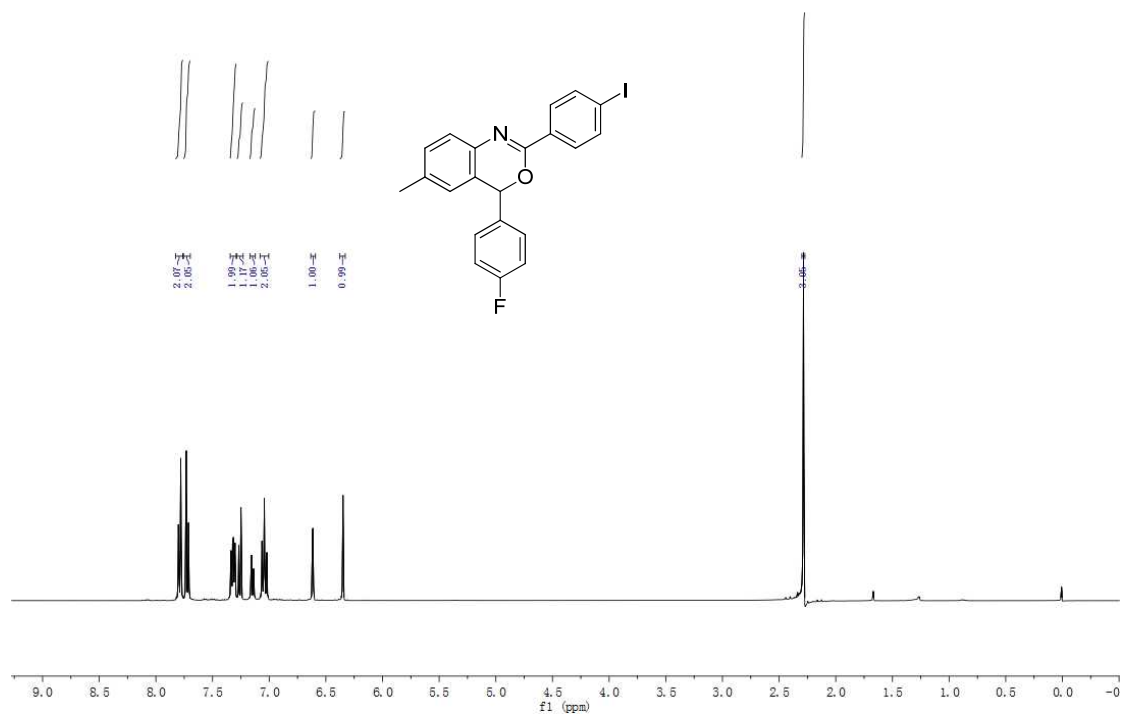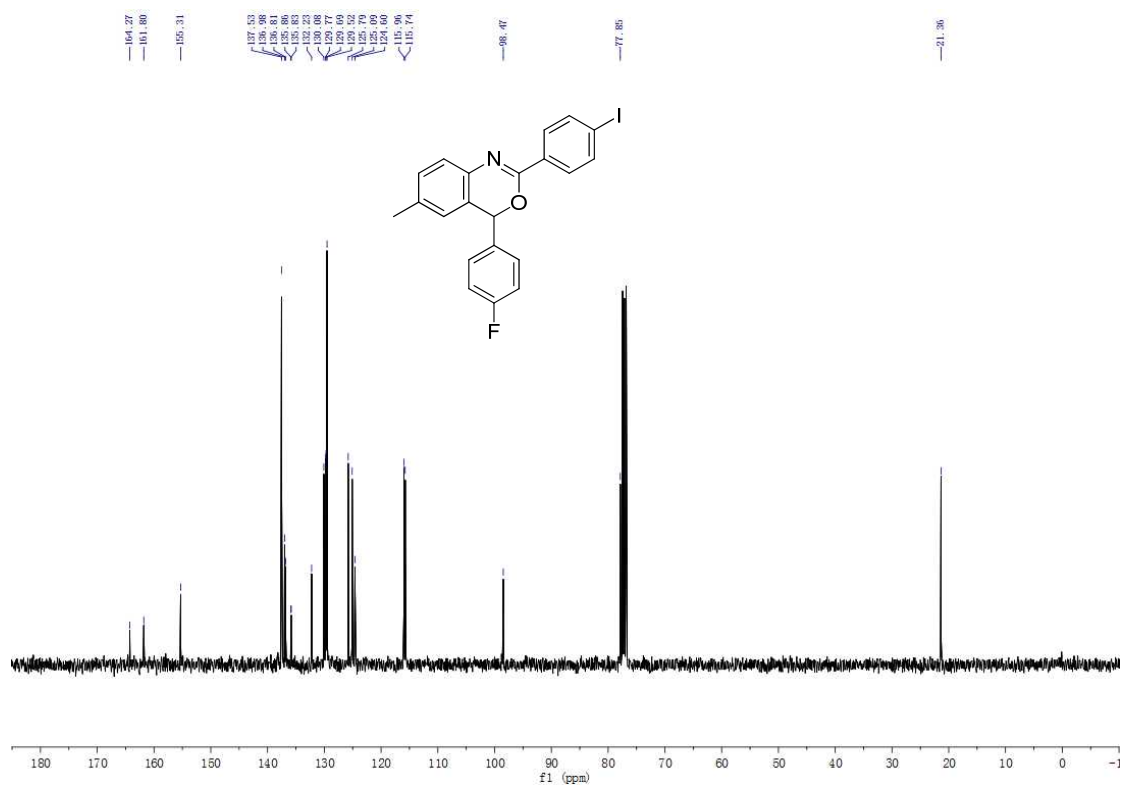

<sup>1</sup>H NMR (400 MHz, CDCl<sub>3</sub>) (up) and <sup>13</sup>C NMR (101 MHz, CDCl<sub>3</sub>) (down)



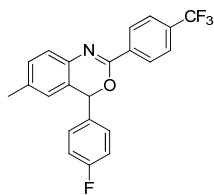

**4-(4-fluorophenyl)-6-methyl-2-(4-(trifluoromethyl)phenyl)-4H-benzo[d][1,3]oxazine (4agb)**: white solid, 177 mg, yield: 92%, melt point: 123 °C.

<sup>1</sup>H NMR (400 MHz, CHLOROFORM-D) δ 8.19 (d, J = 8.3 Hz, 2H), 7.64 (d, J = 8.4 Hz, 2H), 7.33 (ddd, J = 15.1, 9.3, 4.9 Hz, 3H), 7.17 (d, J = 8.1 Hz, 1H), 7.09 - 7.02 (m, 2H), 6.64 (s, 1H), 6.40 (s, 1H), 2.30 (s, 3H).

<sup>13</sup>C NMR (101 MHz, CHLOROFORM-D) δ 163.1 (d, J = 248.2 Hz), 154.6, 137.4, 136.6, 136.1, 135.8 (d, J = 3.1 Hz), 132.8 (q, J = 32.5 Hz), 130.15, 129.8 (d, J = 8.5 Hz, 2×CH), 128.2(2×CH), 125.8, 125.4, 125.3, 125.2 (d, J = 3.7 Hz, 2×CH), 124.5, 122.7, 119.9, 115.9 (d, J = 21.7 Hz, 2×CH), 78.0, 21.4.

ESI-HRMS: m/z calcd for C<sub>22</sub>H<sub>15</sub>F<sub>4</sub>NO [M+H]<sup>+</sup>: 386.1090; found: 386.1094.

GC-MS: 385.

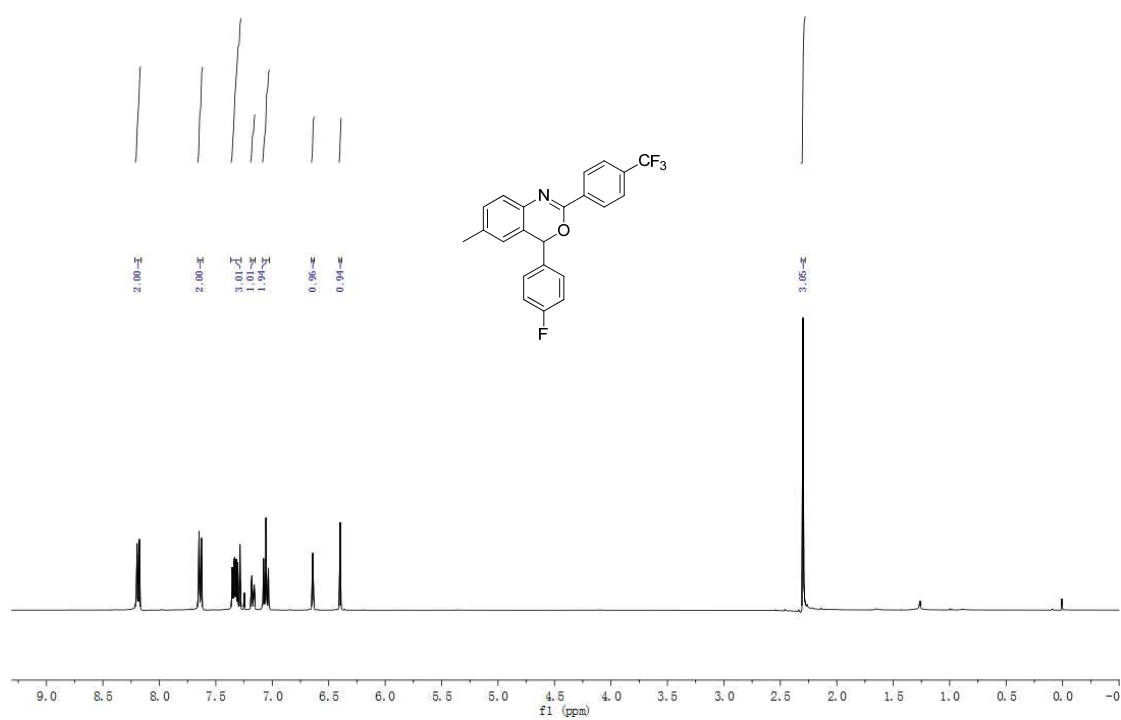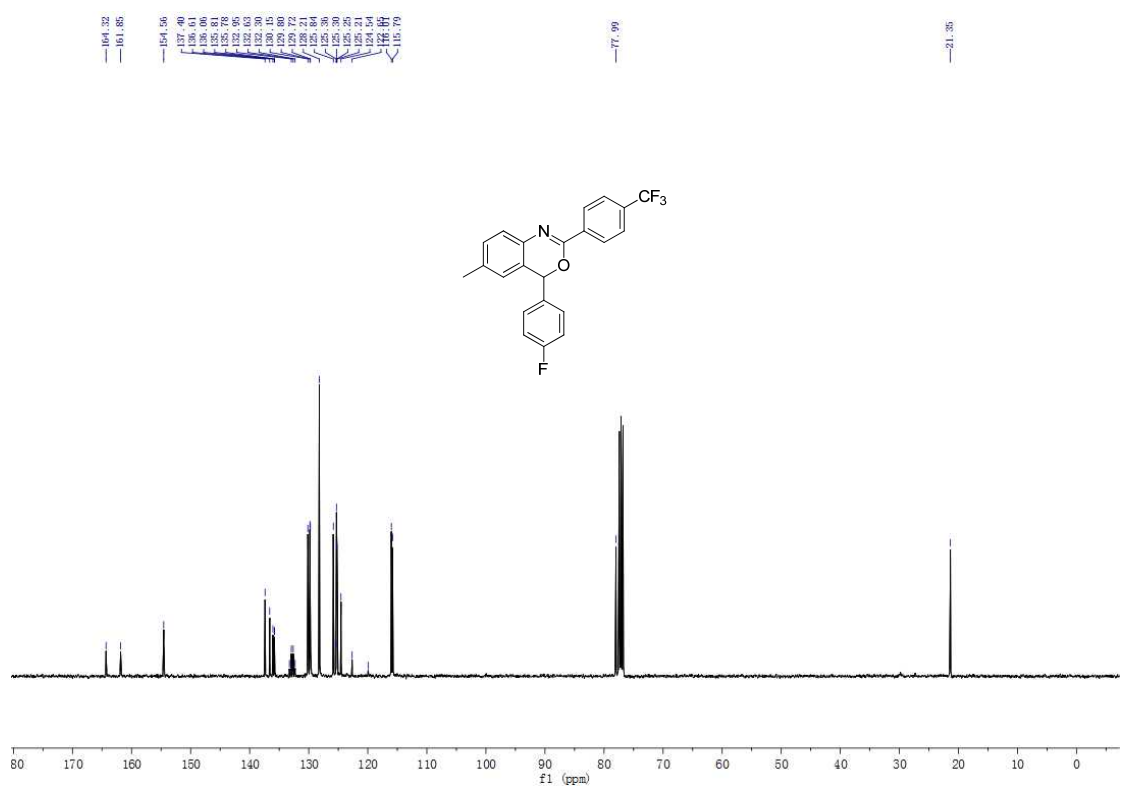

$^1\text{H NMR}$  (400 MHz,  $\text{CDCl}_3$ ) (up) and  $^{13}\text{C NMR}$  (101 MHz,  $\text{CDCl}_3$ ) (down)

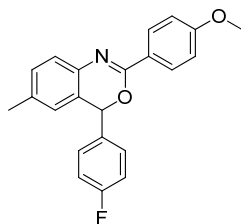

**4-(4-fluorophenyl)-2-(4-methoxyphenyl)-6-methyl-4H-benzo[d][1,3]oxazine**

**(4ahb)**: colorless oil, 40 mg, yield: 23%.

<sup>1</sup>H NMR (400 MHz, CHLOROFORM-D)  $\delta$  8.09 - 7.99 (m, 2H), 7.34 (dd,  $J = 7.8, 5.5$  Hz, 2H), 7.25 - 7.23 (m, 1H), 7.13 (d,  $J = 7.7$  Hz, 1H), 7.08 - 7.00 (m, 2H), 6.91 - 6.86 (m, 2H), 6.61 (s, 1H), 6.33 (s, 1H), 3.83 (s, 3H), 2.28 (s, 3H).

<sup>13</sup>C NMR (101 MHz, CHLOROFORM-D)  $\delta$  163.0 (d,  $J = 247.9$  Hz), 162.3, 156.0, 137.4, 136.1, 136.0 (d,  $J = 2.9$  Hz), 130.0, 129.8(2 $\times$ CH), 129.7 (d,  $J = 8.4$  Hz, 2 $\times$ CH), 125.7, 125.1, 124.7, 124.6, 115.7 (d,  $J = 21.6$  Hz, 2 $\times$ CH), 113.7 (2 $\times$ CH), 77.7, 55.5, 21.3.

ESI-HRMS:  $m/z$  calcd for C<sub>22</sub>H<sub>18</sub>FNO<sub>2</sub> [M+H]<sup>+</sup>:348.1322; found:348.1325.

GC-MS: 347.

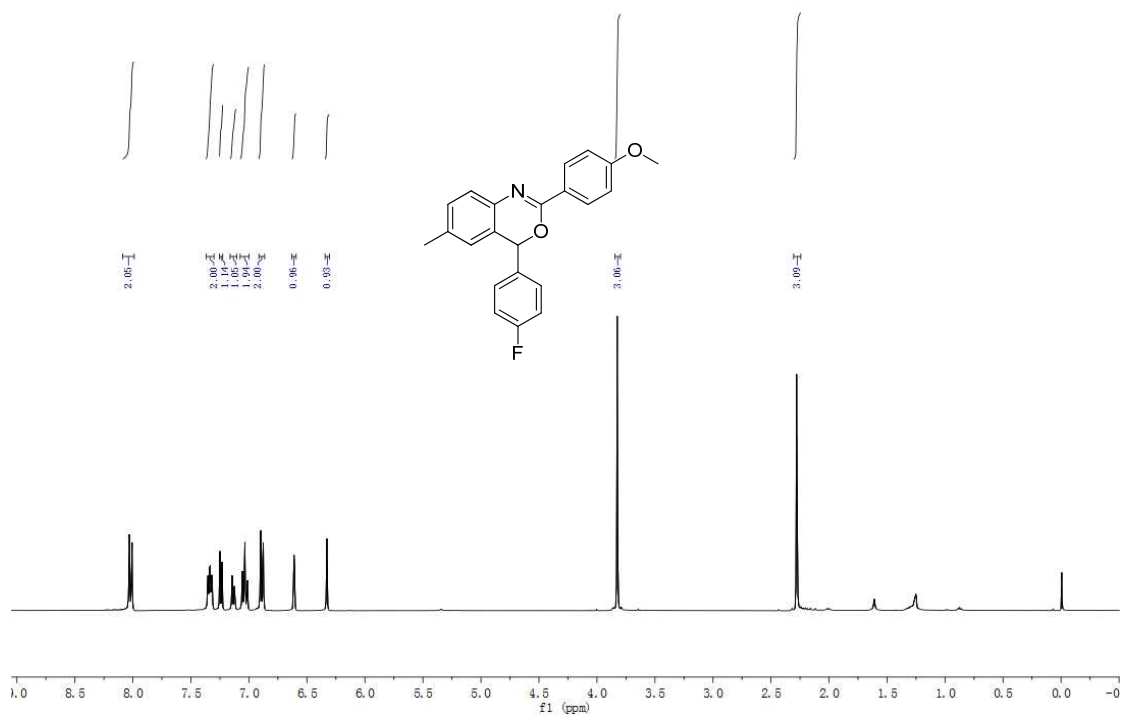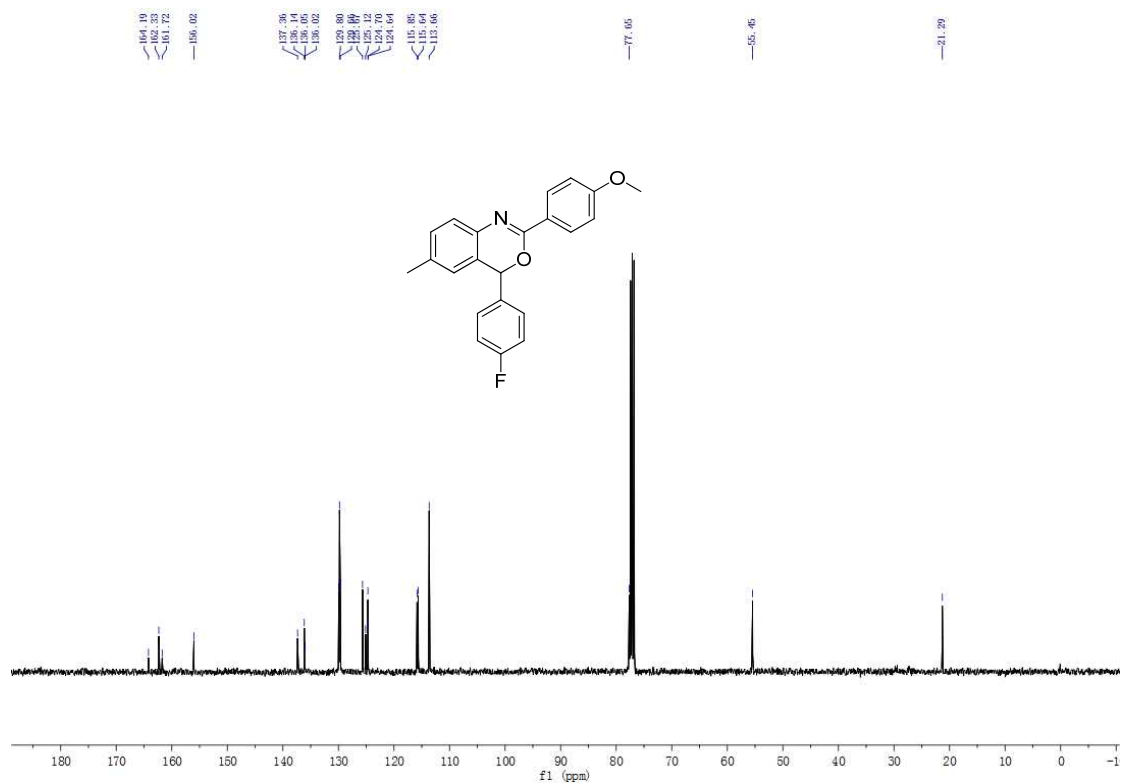

$^1\text{H NMR}$  (400 MHz,  $\text{CDCl}_3$ ) (up) and  $^{13}\text{C NMR}$  (101 MHz,  $\text{CDCl}_3$ ) (down)

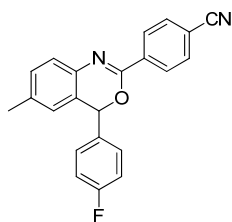

**4-(4-(4-fluorophenyl)-6-methyl-4H-benzo[d][1,3]oxazin-2-yl)benzonitrile (4aib):**

white solid, 80 mg, yield: 47%, melt point: 159 °C.

<sup>1</sup>H NMR (400 MHz, CHLOROFORM-D) δ 8.18 – 8.14 (m, 2H), 7.69 - 7.64 (m, 2H), 7.34 - 7.29 (m, 2H), 7.27 (d, J = 8.0 Hz, 1H), 7.17 (dd, J = 8.2, 1.2 Hz, 1H), 7.08 - 7.02 (m, 2H), 6.63 (s, 1H), 6.40 (s, 1H), 2.29 (s, 3H).

<sup>13</sup>C NMR (101 MHz, CHLOROFORM-D) δ 163.12 (d, J = 248.3 Hz), 154.0, 137.6, 136.8, 136.4, 135.6 (d, J = 2.8 Hz), 132.1(2×CH), 130.2, 129.8 (d, J = 8.2 Hz, 2×CH), 128.3(2×CH), 125.9, 125.4, 124.4, 118.6, 116.0 (d, J = 21.8 Hz, 2×CH), 114.5, 78.1, 21.4.

ESI-HRMS: m/z calcd for C<sub>22</sub>H<sub>15</sub>FN<sub>2</sub>O [M+H]<sup>+</sup>: 343.1186; found: 343.1188.

GC-MS: 342.

yhj  
single\_pulse

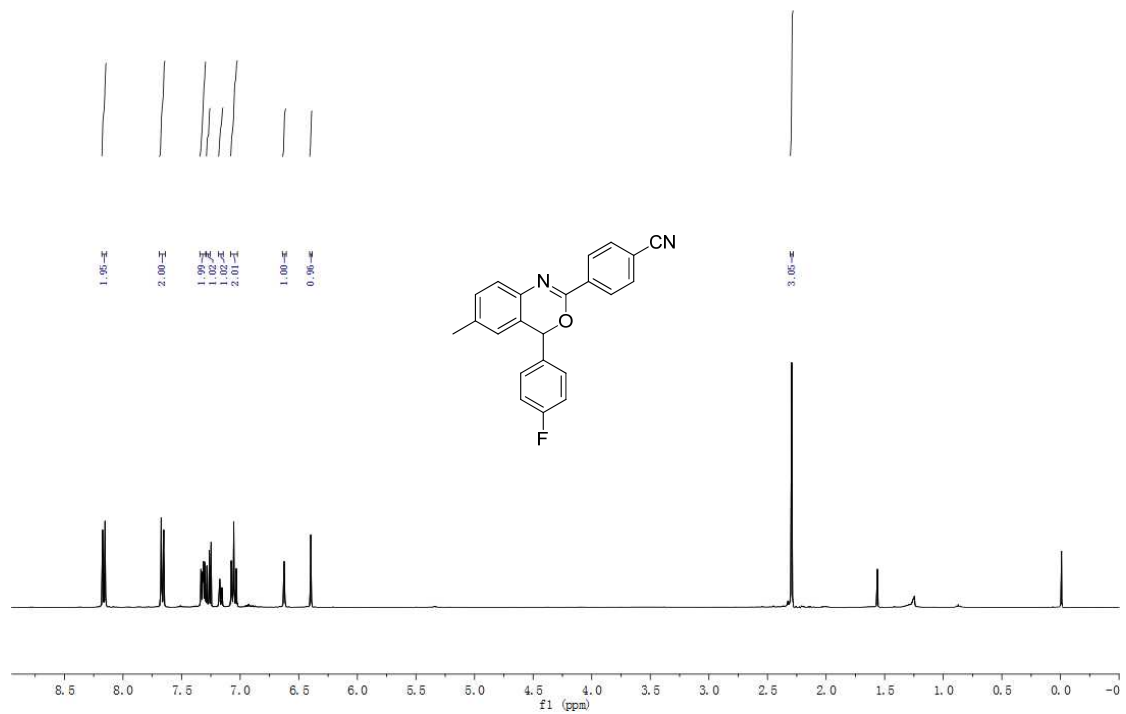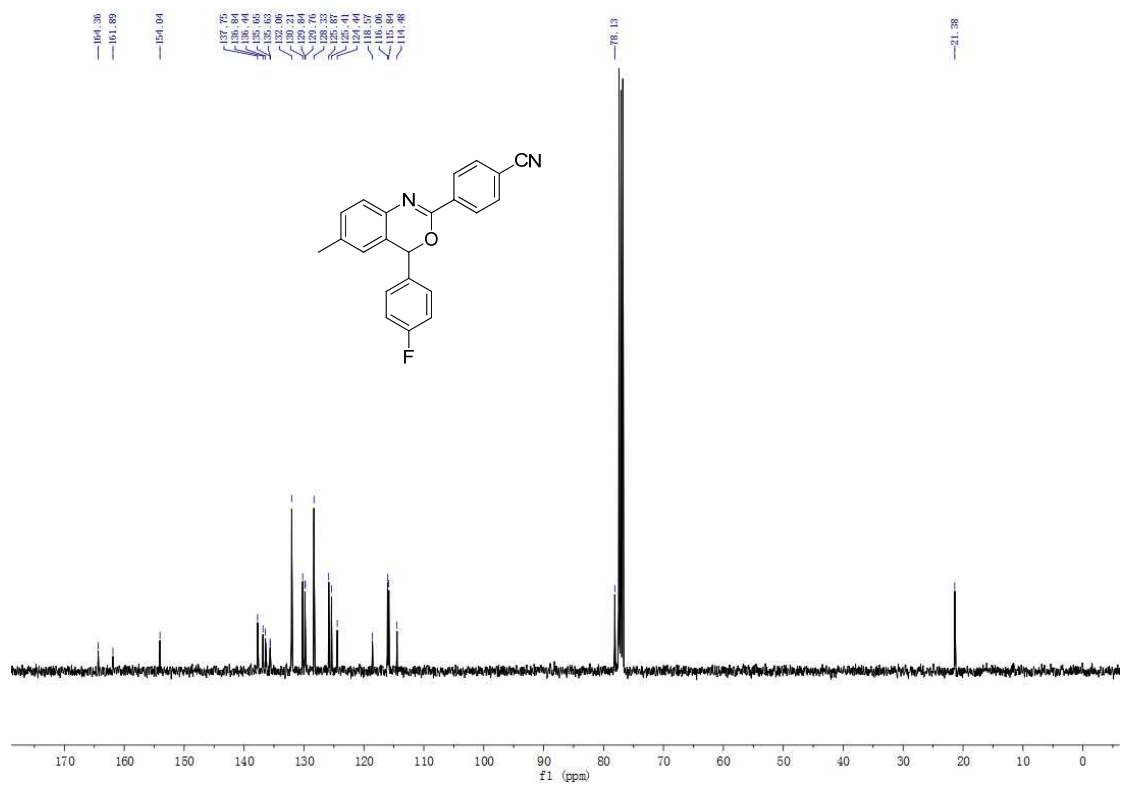

$^1\text{H}$  NMR (400 MHz,  $\text{CDCl}_3$ ) (up) and  $^{13}\text{C}$  NMR (101 MHz,  $\text{CDCl}_3$ ) (down)

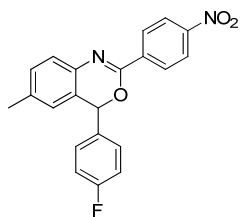

**4-(4-fluorophenyl)-6-methyl-2-(4-nitrophenyl)-4H-benzo[d][1,3]oxazine (4ajb):**

yellow solid, 136 mg, yield: 75%, melt point: 159 °C.

$^1\text{H}$  NMR (400 MHz, CHLOROFORM-D)  $\delta$  8.26 - 8.17 (m, 4H), 7.32 (ddd,  $J = 13.5, 9.6, 6.8$  Hz, 3H), 7.18 (d,  $J = 7.9$  Hz, 1H), 7.06 (dd,  $J = 12.2, 4.9$  Hz, 2H), 6.63 (s, 1H), 6.42 (s, 1H), 2.30 (s, 3H).

$^{13}\text{C}$  NMR (101 MHz, CHLOROFORM-D)  $\delta$  163.1 (d,  $J = 248.3$  Hz), 153.8, 149.5, 138.5, 137.9, 136.4, 135.6 (d,  $J = 2.9$  Hz), 130.3, 129.8 (d,  $J = 8.4$  Hz, 2 $\times$ CH), 128.7(2 $\times$ CH), 125.9, 125.5, 124.4, 123.5(2 $\times$ CH), 116.0 (d,  $J = 21.7$  Hz, 2 $\times$ CH), 78.2, 21.4.

ESI-HRMS:  $m/z$  calcd for  $\text{C}_{21}\text{H}_{15}\text{FN}_2\text{O}_3$   $[\text{M}+\text{H}]^+$ : 363.1067; found: 363.1067.

GC-MS: 362.

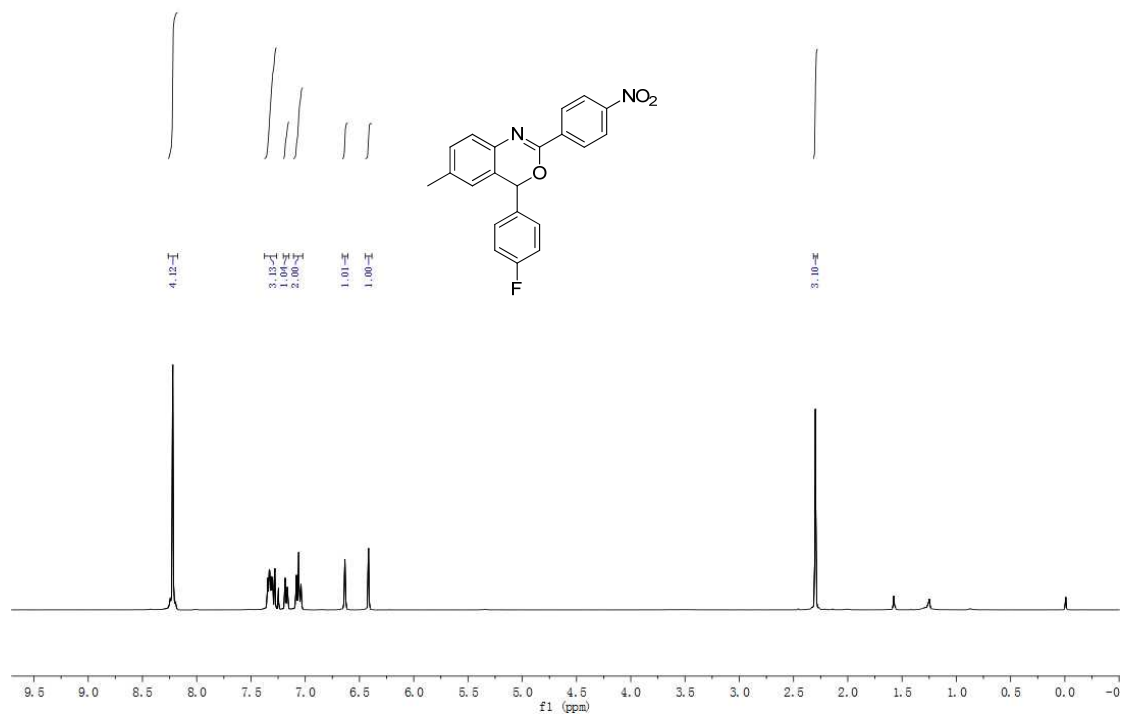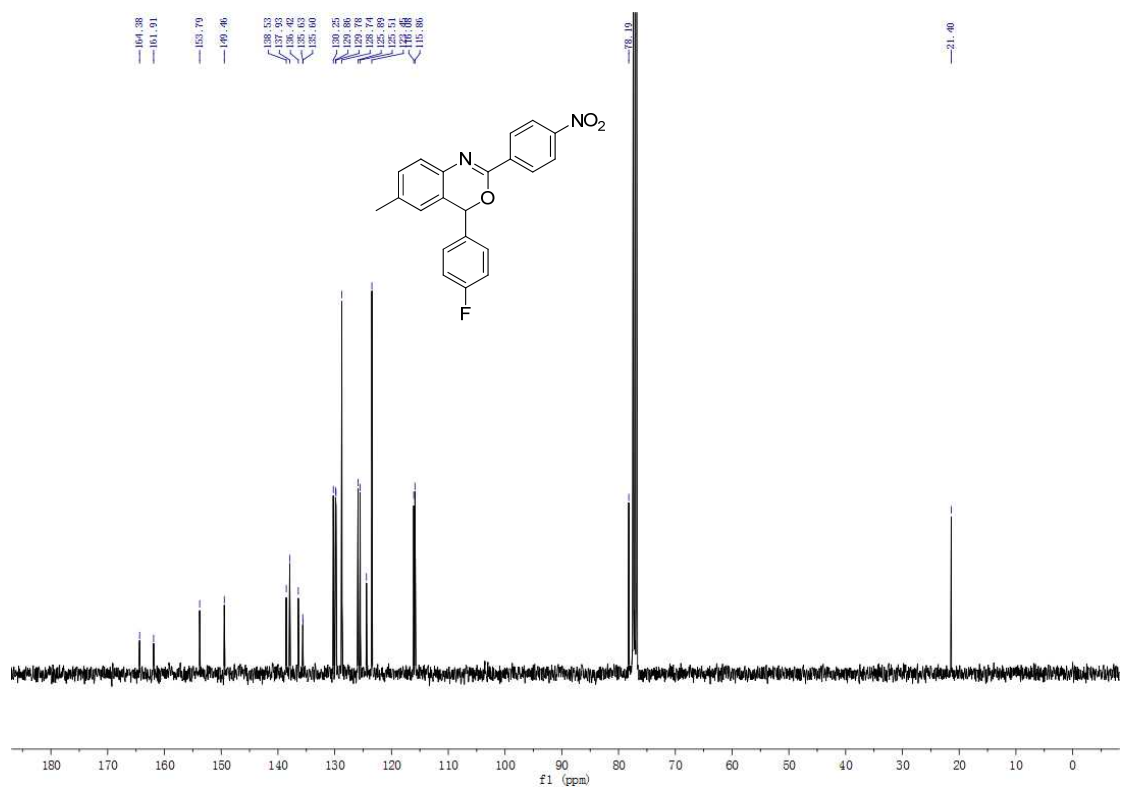

<sup>1</sup>H NMR (400 MHz, CDCl<sub>3</sub>) (up) and <sup>13</sup>C NMR (101 MHz, CDCl<sub>3</sub>) (down)



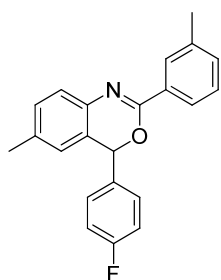

**4-(4-fluorophenyl)-6-methyl-2-(m-tolyl)-4H-benzo[d][1,3]oxazine(4akb)**: colorless oil, 132 mg, yield: 80%.

$^1\text{H}$  NMR (400 MHz, CHLOROFORM-D)  $\delta$  7.91 (s, 1H), 7.88 - 7.83 (m, 1H), 7.38 - 7.32 (m, 2H), 7.30 - 7.24 (m, 3H), 7.15 (d,  $J = 8.8$  Hz, 1H), 7.09 - 7.01 (m, 2H), 6.62 (s, 1H), 6.36 (s, 1H), 2.38 (s, 3H), 2.29 (s, 3H).

$^{13}\text{C}$  NMR (101 MHz, CHLOROFORM-D)  $\delta$  163.0 (d,  $J = 247.7$  Hz), 156.3, 138.0, 137.1, 136.6, 136.0 (d,  $J = 3.0$  Hz), 132.6, 132.2, 130.0, 129.7 (d,  $J = 8.4$  Hz,  $2\times\text{CH}$ ), 128.5, 128.2, 125.7, 125.2, 125.0, 124.7, 115.8 (d,  $J = 21.7$  Hz,  $2\times\text{CH}$ ), 77.8, 21.5, 21.3.

ESI-HRMS:  $m/z$  calcd for  $\text{C}_{22}\text{H}_{18}\text{FNO}$   $[\text{M}+\text{H}]^+$ : 332.1372; found: 332.1374.

GC-MS: 331.

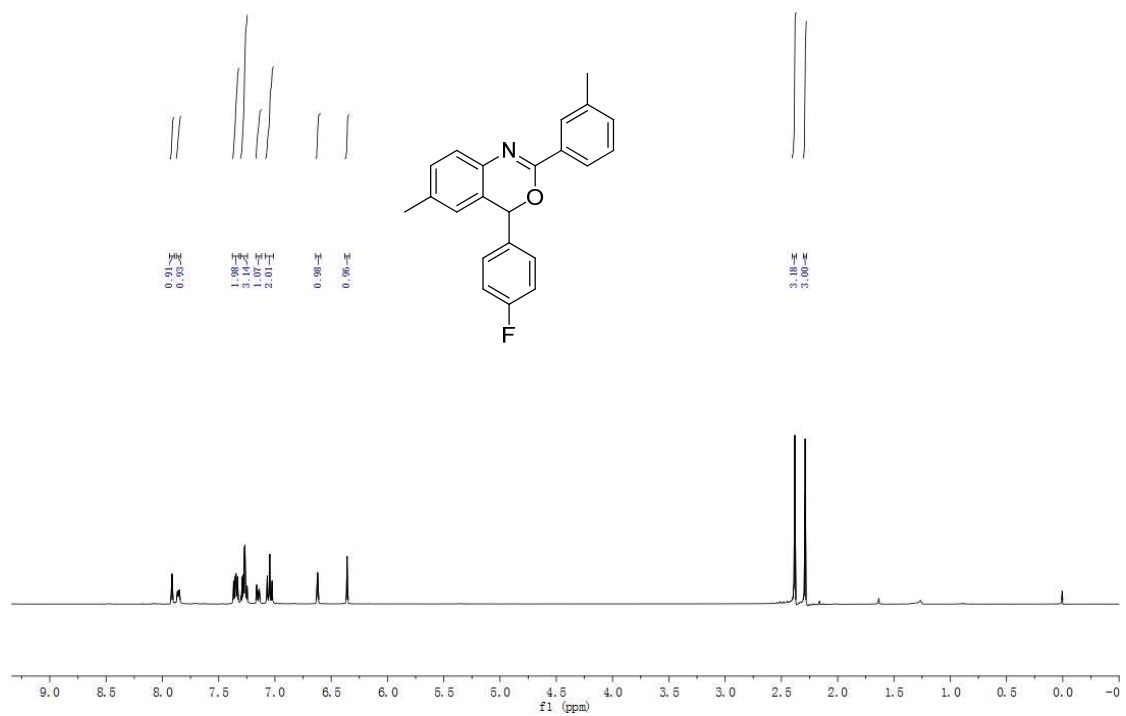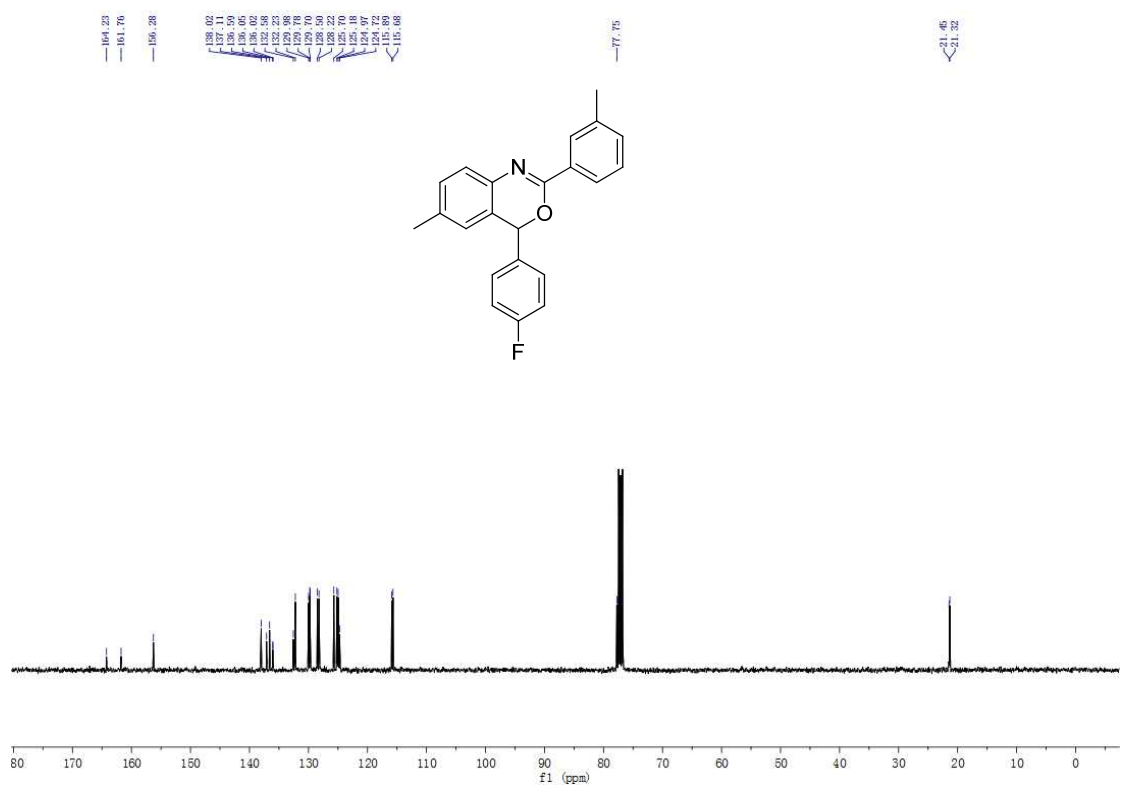

<sup>1</sup>H NMR (400 MHz, CDCl<sub>3</sub>) (up) and <sup>13</sup>C NMR (101 MHz, CDCl<sub>3</sub>) (down)

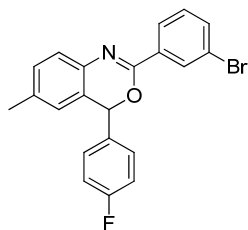

**2-(3-bromophenyl)-4-(4-fluorophenyl)-6-methyl-4H-benzo[d][1,3]oxazine (4alb):**

colorless oil, 160 mg, yield: 81%.

$^1\text{H}$  NMR (400 MHz, CHLOROFORM-D)  $\delta$  8.21 (t,  $J = 1.8$  Hz, 1H), 8.00 (dt,  $J = 7.8$ , 1.1 Hz, 1H), 7.58 - 7.55 (m, 1H), 7.35 - 7.31 (m, 2H), 7.26 (t,  $J = 4.9$  Hz, 2H), 7.18 - 7.13 (m, 1H), 7.08 - 7.03 (m, 2H), 6.61 (d,  $J = 0.6$  Hz, 1H), 6.37 (s, 1H), 2.29 (s, 3H).

$^{13}\text{C}$  NMR (101 MHz, CHLOROFORM-D)  $\delta$  163.1 (d,  $J = 248.0$  Hz), 154.6, 137.1, 136.7, 135.8 (d,  $J = 3.3$  Hz), 134.7, 134.2, 130.9, 129.8, 129.8 (d,  $J = 8.2$  Hz, 2 $\times$ CH), 129.8, 126.5, 125.8, 125.2, 124.6, 122.5, 115.9 (d,  $J = 21.7$  Hz, 2 $\times$ CH), 78.0, 21.3.

ESI-HRMS:  $m/z$  calcd for  $\text{C}_{21}\text{H}_{15}\text{BrFNO}$   $[\text{M}+\text{H}]^+$ : 396.0321; found: 396.0321.

GC-MS: 395.

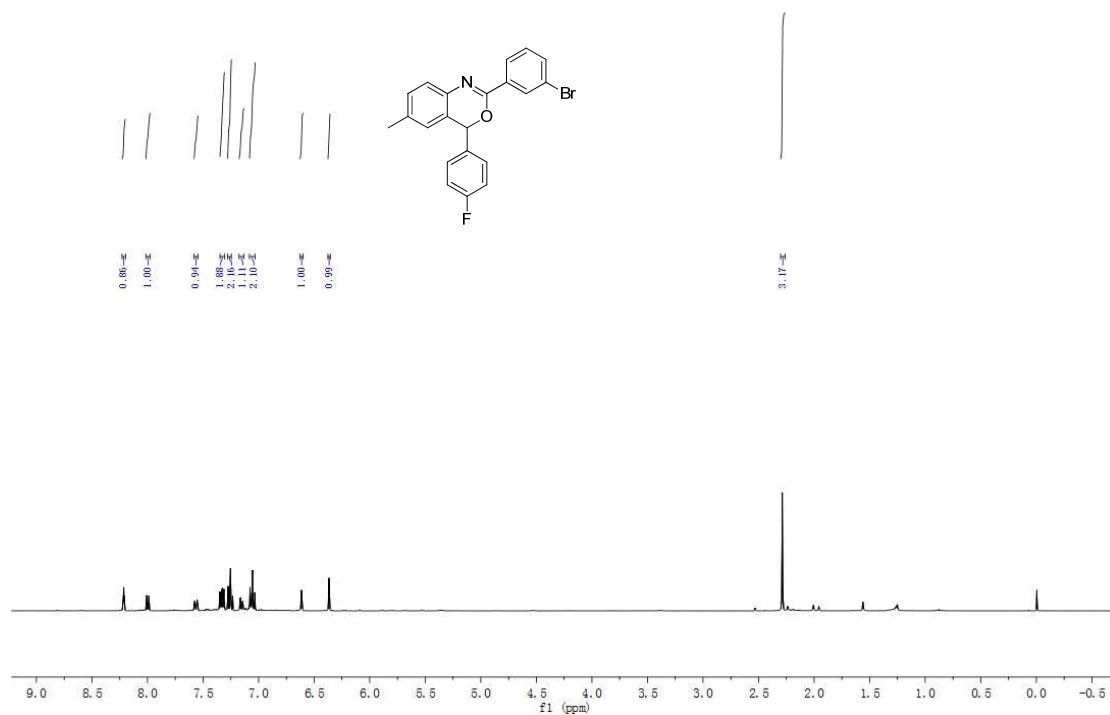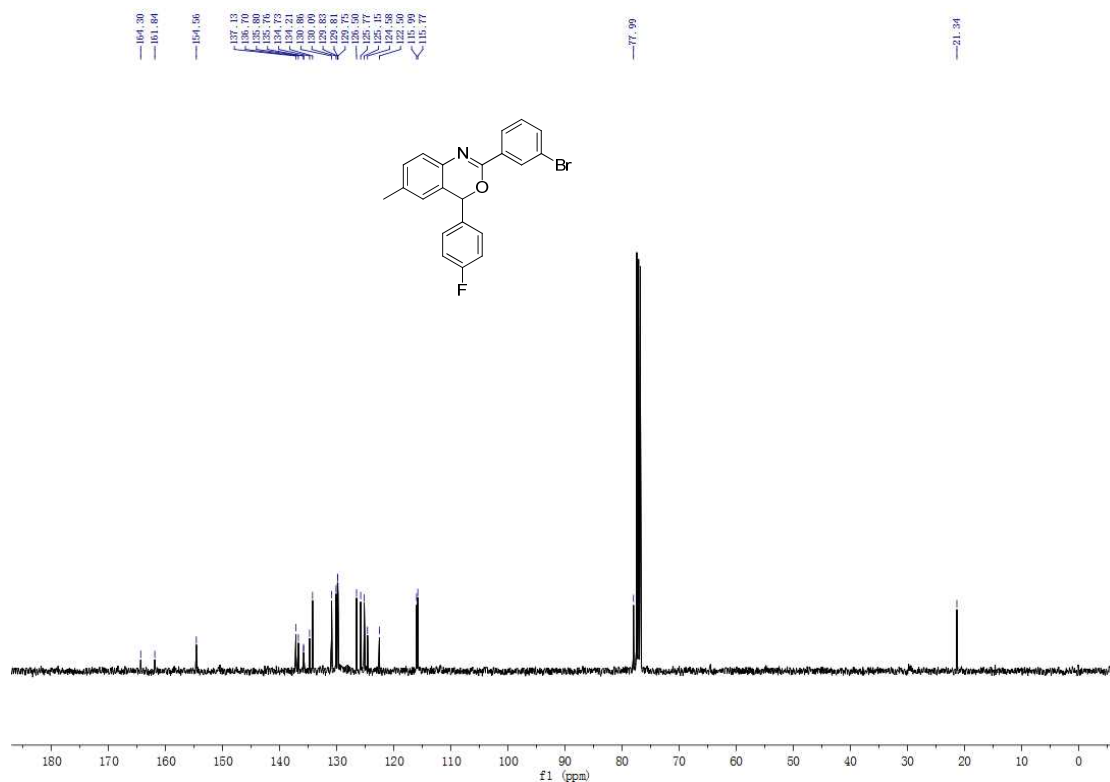

<sup>1</sup>H NMR (400 MHz, CDCl<sub>3</sub>) (up) and <sup>13</sup>C NMR (101 MHz, CDCl<sub>3</sub>) (down)

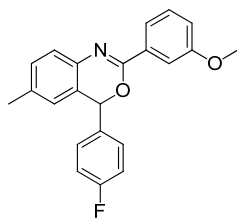

**4-(4-fluorophenyl)-2-(3-methoxyphenyl)-6-methyl-4H-benzo[d][1,3]oxazine**

**(4amb)**: colorless oil, 111 mg, yield: 64%.

$^1\text{H}$  NMR (400 MHz, CHLOROFORM-D)  $\delta$  7.69 - 7.62 (m, 2H), 7.33 (dd,  $J = 8.2, 2.8$  Hz, 2H), 7.27 (t,  $J = 8.4$  Hz, 2H), 7.15 (d,  $J = 7.8$  Hz, 1H), 7.07 - 6.98 (m, 3H), 6.63 (s, 1H), 6.36 (s, 1H), 3.84 (s, 3H), 2.29 (s, 3H).

$^{13}\text{C}$  NMR (101 MHz, CHLOROFORM-D)  $\delta$  163.0 (d,  $J = 247.8$  Hz), 159.6, 155.9, 137.0, 136.7, 136.0 (d,  $J = 3.0$  Hz), 134.1, 130.0, 129.7 (d,  $J = 8.4$  Hz,  $2\times\text{CH}$ ), 129.3, 125.7, 125.1, 124.7, 120.5, 117.8, 115.8 (d,  $J = 21.7$  Hz,  $2\times\text{CH}$ ), 112.7, 77.8, 55.5, 21.3.

ESI-HRMS:  $m/z$  calcd for  $\text{C}_{22}\text{H}_{18}\text{FNO}_2$   $[\text{M}+\text{H}]^+$ : 348.1322; found: 348.1323.

GC-MS: 347.

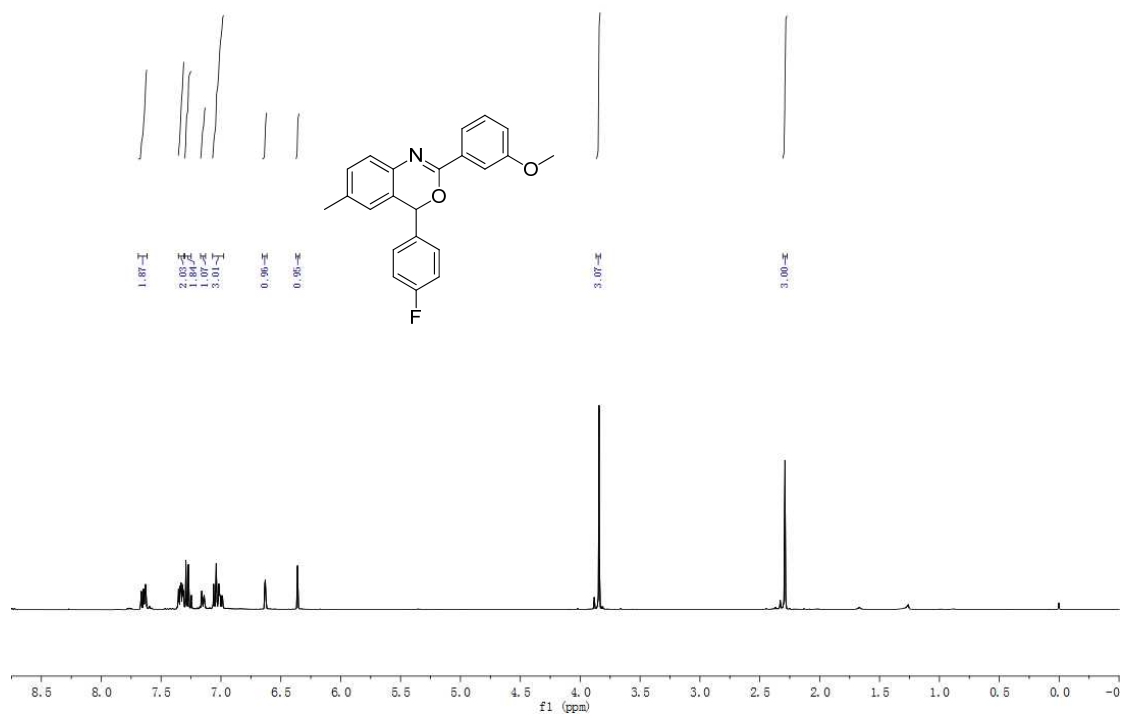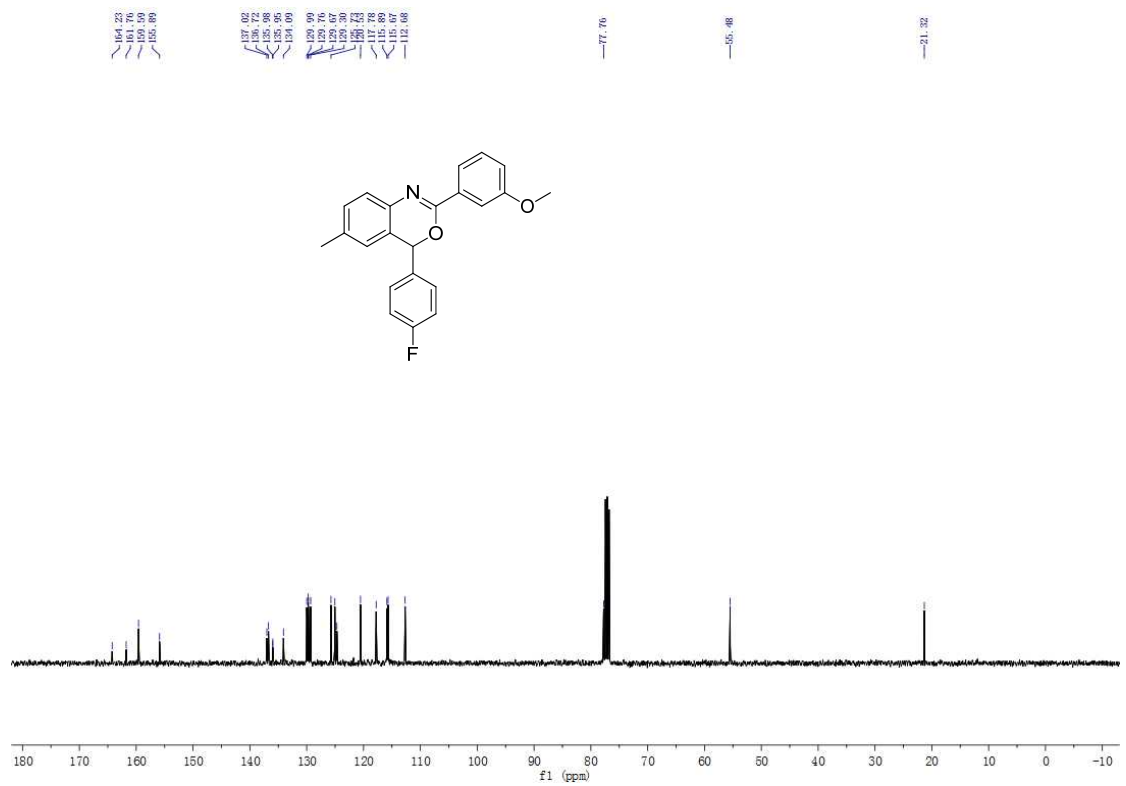

$^1\text{H NMR}$  (400 MHz,  $\text{CDCl}_3$ ) (up) and  $^{13}\text{C NMR}$  (101 MHz,  $\text{CDCl}_3$ ) (down)

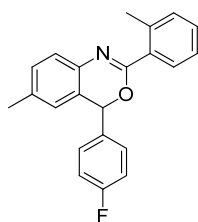

**4-(4-fluorophenyl)-6-methyl-2-(o-tolyl)-4H-benzo[d][1,3]oxazine (4anb)**: colorless oil, 89 mg, yield: 54%.

$^1\text{H}$  NMR (400 MHz, CHLOROFORM-D)  $\delta$  7.64 (dd,  $J = 6.4, 2.4$  Hz, 1H), 7.38 - 7.33 (m, 2H), 7.29 (dd,  $J = 9.7, 3.4$  Hz, 1H), 7.25 (d,  $J = 1.9$  Hz, 1H), 7.20 - 7.13 (m, 3H), 7.10 - 7.03 (m, 2H), 6.60 (s, 1H), 6.37 (s, 1H), 2.46 (s, 3H), 2.28 (s, 3H).

$^{13}\text{C}$  NMR (101 MHz, CHLOROFORM-D)  $\delta$  163.1 (d,  $J = 248.2$  Hz), 157.9, 138.3, 137.1, 136.9, 135.8 (d,  $J = 3.2$  Hz), 132.7, 131.3, 130.4, 130.2, 130.1, 130.0, 129.8, 125.7 (d,  $J = 8.3$  Hz, 2 $\times$ CH), 125.0, 124.3, 115.8 (d,  $J = 21.7$  Hz, 2 $\times$ CH), 78.0, 21.4, 21.3.

ESI-HRMS:  $m/z$  calcd for  $\text{C}_{22}\text{H}_{18}\text{FNO}$   $[\text{M}+\text{H}]^+$ :332.1372; found:332.1375.

GC-MS: 331.

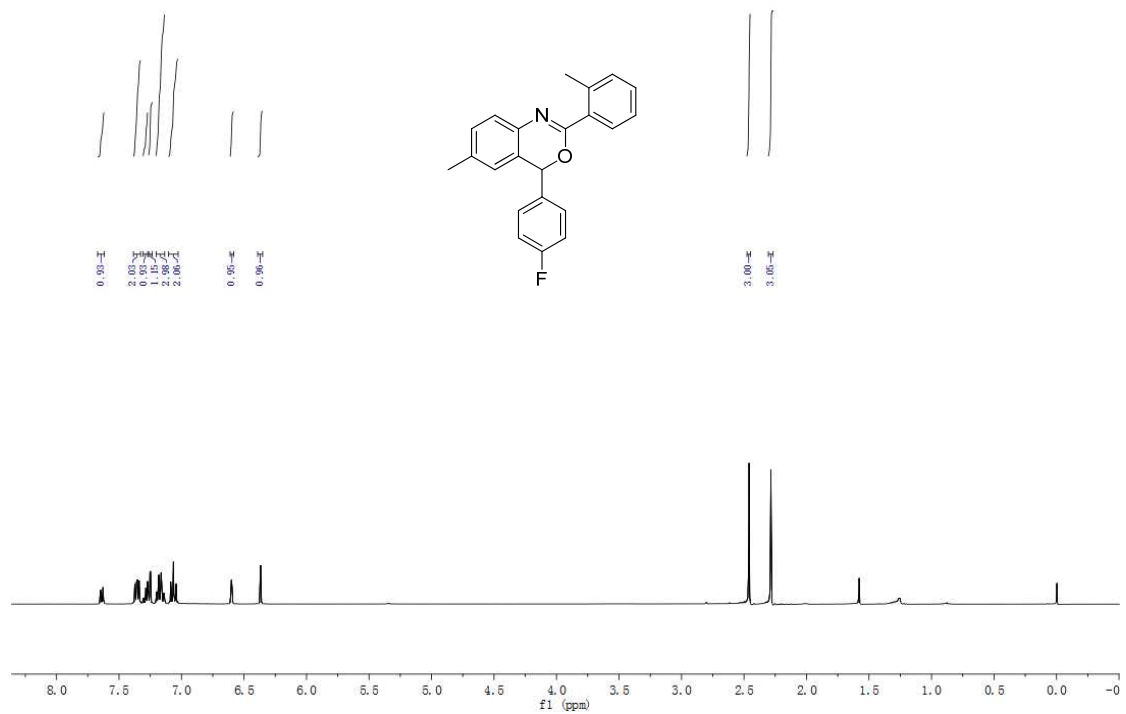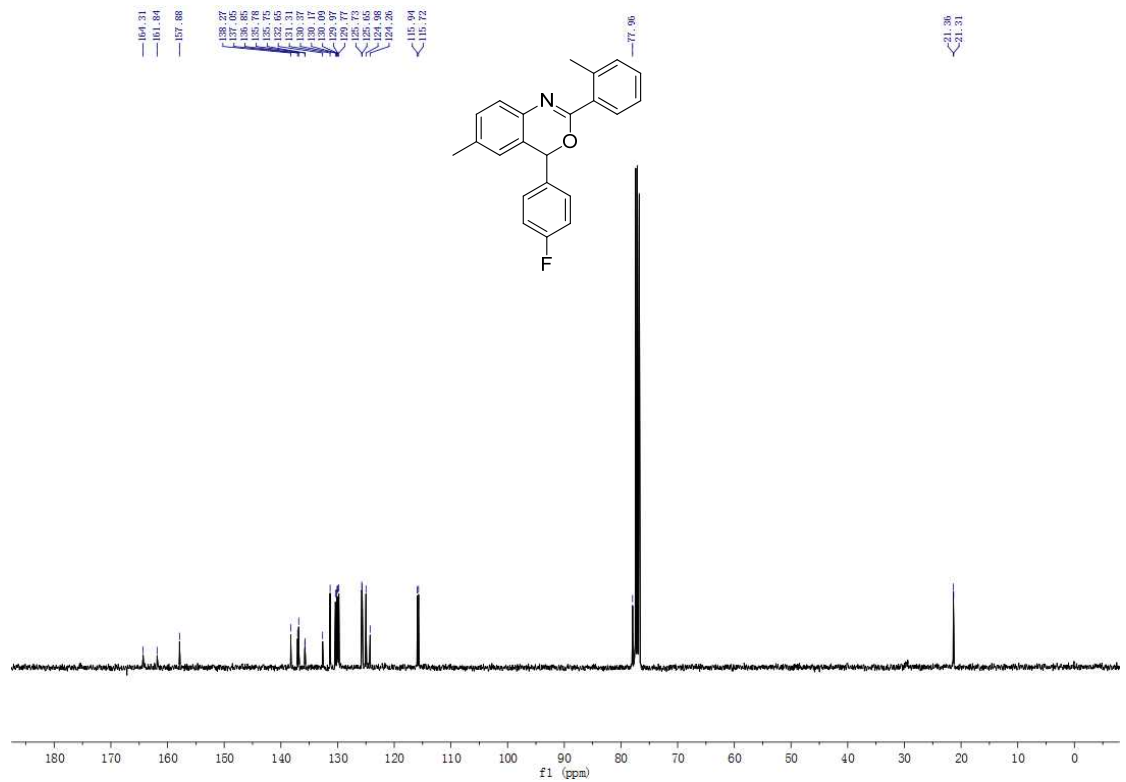

<sup>1</sup>H NMR (400 MHz, CDCl<sub>3</sub>) (up) and <sup>13</sup>C NMR (101 MHz, CDCl<sub>3</sub>) (down)



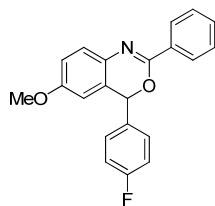

**4-(4-fluorophenyl)-6-methoxy-2-phenyl-4H-benzo[d][1,3]oxazine (4bab):**

colorless oil, 128 mg, yield: 77%.

$^1\text{H}$  NMR (400 MHz, CHLOROFORM-D)  $\delta$  8.07 (d,  $J$  = 8.2 Hz, 2H), 7.39 (dddd,  $J$  = 13.9, 11.8, 7.1, 1.3 Hz, 6H), 7.04 (td,  $J$  = 8.6, 1.6 Hz, 2H), 6.88 (dd,  $J$  = 8.6, 2.2 Hz, 1H), 6.36 (d,  $J$  = 1.4 Hz, 2H), 3.74 (d,  $J$  = 1.5 Hz, 3H).

$^{13}\text{C}$  NMR (101 MHz, CHLOROFORM-D)  $\delta$  163.0 (d,  $J$  = 247.8 Hz), 158.4, 155.0, 135.7 (d,  $J$  = 2.8 Hz), 133.0, 132.7, 131.2, 129.7 (d,  $J$  = 8.5 Hz, 2 $\times$ CH), 128.3(2 $\times$ CH), 127.8(2 $\times$ CH), 126.4, 126.1, 115.8 (d,  $J$  = 21.6 Hz, 2 $\times$ CH), 114.1, 111.0, 77.6, 55.6.

ESI-HRMS:  $m/z$  calcd for  $\text{C}_{21}\text{H}_{16}\text{FNO}_2$   $[\text{M}+\text{H}]^+$ :334.1165; found:334.1168.

GC-MS: 333.

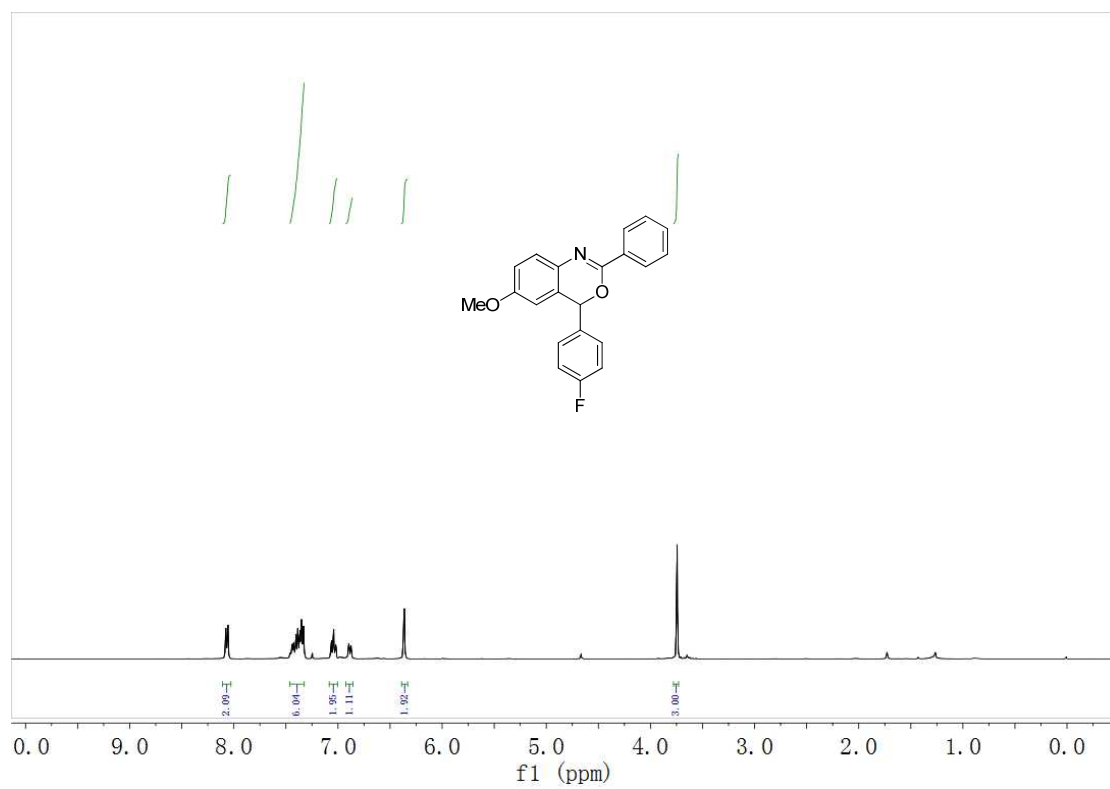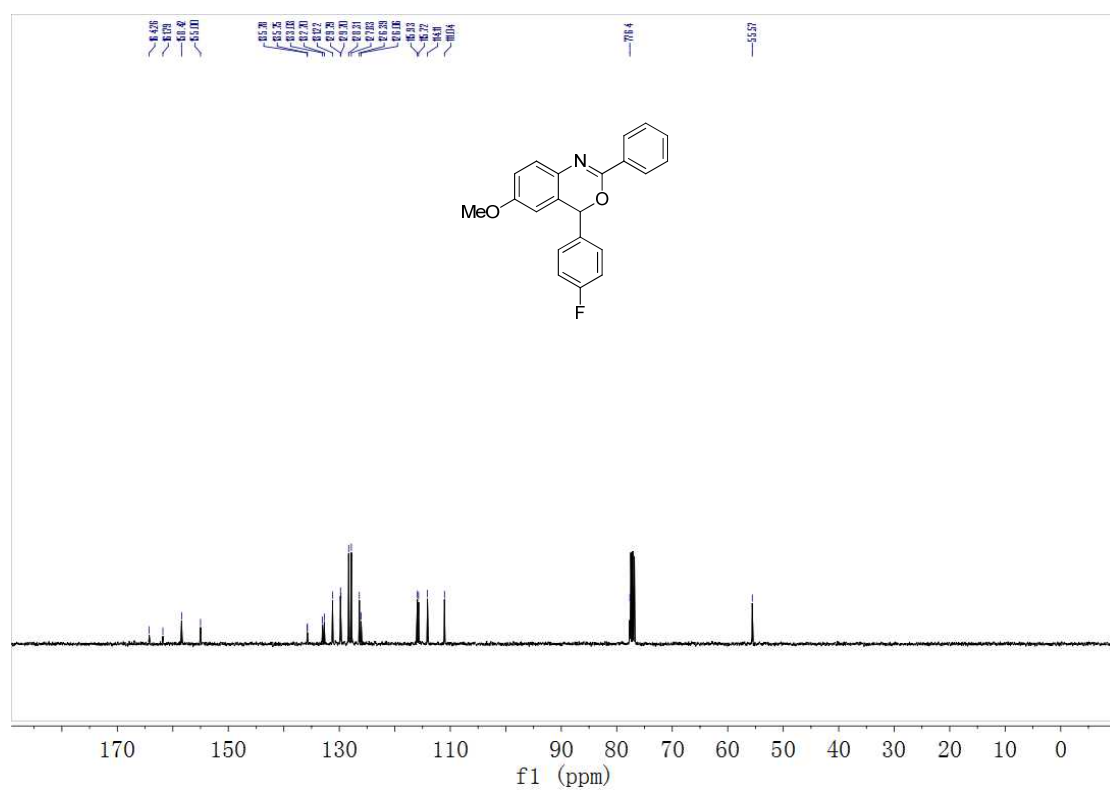

$^1\text{H NMR}$  (400 MHz,  $\text{CDCl}_3$ ) (up) and  $^{13}\text{C NMR}$  (101 MHz,  $\text{CDCl}_3$ ) (down)

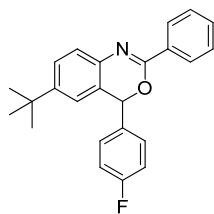

**6-(tert-butyl)-4-(4-fluorophenyl)-2-phenyl-4H-benzo[d][1,3]oxazine (4cab):** white solid, 165 mg, yield: 92%, melt point: 170 °C.

$^1\text{H}$  NMR (400 MHz, CHLOROFORM-D)  $\delta$  8.11 - 8.05 (m, 2H), 7.48 - 7.32 (m, 7H), 7.08 - 7.01 (m, 2H), 6.86 (d,  $J = 1.9$  Hz, 1H), 6.42 (s, 1H), 1.27 (s, 9H).

$^{13}\text{C}$  NMR (101 MHz, CHLOROFORM-D)  $\delta$  163.0 (d,  $J = 247.5$  Hz), 156.2, 150.1, 137.1, 136.0 (d,  $J = 2.9$  Hz), 132.7, 131.4, 129.7 (d,  $J = 8.2$  Hz, 2 $\times$ CH), 128.3(2 $\times$ CH), 128.0(2 $\times$ CH), 126.3, 124.7, 124.1, 122.1, 115.8 (d,  $J = 21.6$  Hz, 2 $\times$ CH), 77.9, 34.8, 31.4.

ESI-HRMS:  $m/z$  calcd for  $\text{C}_{24}\text{H}_{22}\text{FNO}$   $[\text{M}+\text{H}]^+$ : 360.1685; found: 360.1688.

GC-MS: 359.

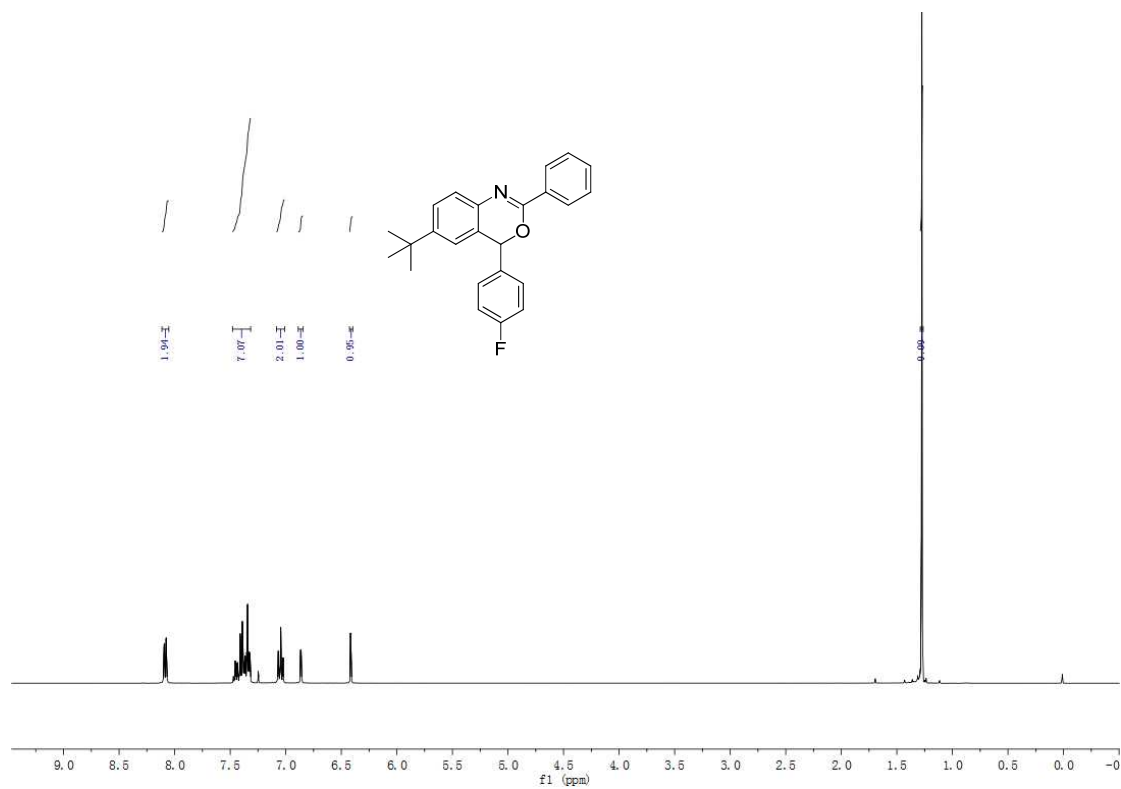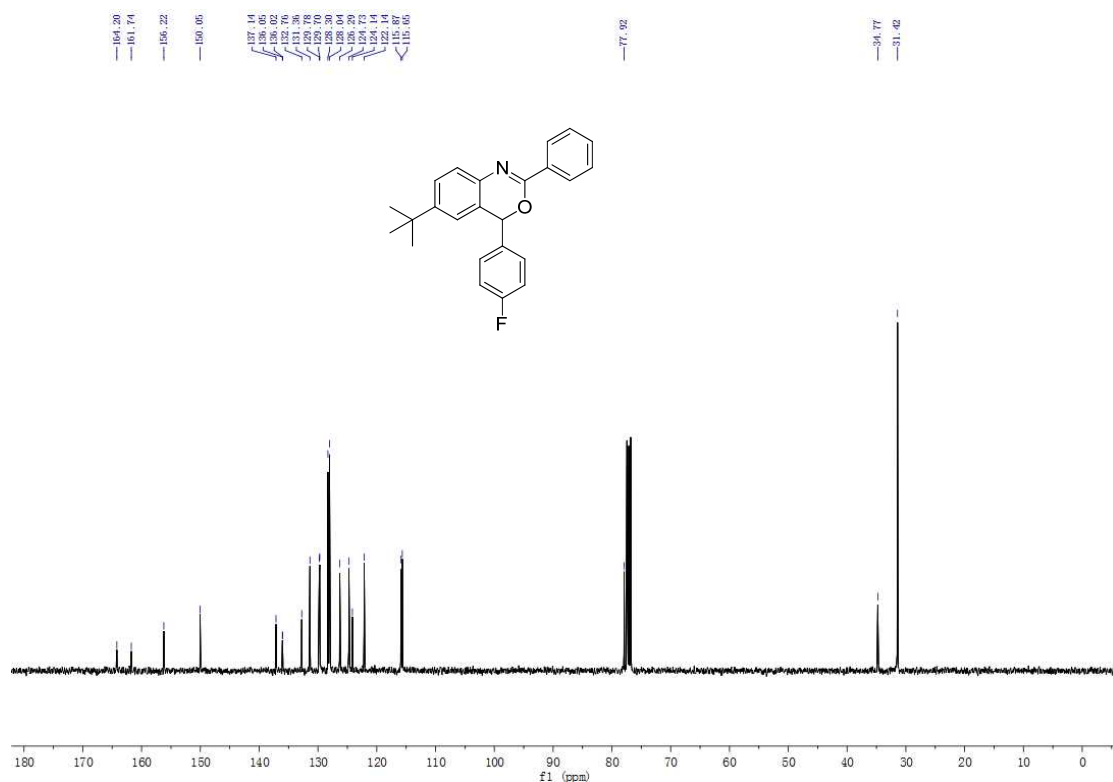

<sup>1</sup>H NMR (400 MHz, CDCl<sub>3</sub>) (up) and <sup>13</sup>C NMR (101 MHz, CDCl<sub>3</sub>) (down)

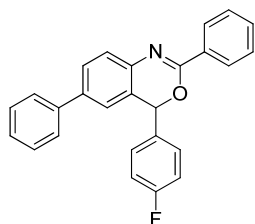

**4-(4-fluorophenyl)-2,6-diphenyl-4H-benzo[d][1,3]oxazine (4dab):** colorless oil, 85 mg, yield: 45%.

$^1\text{H}$  NMR (400 MHz, CHLOROFORM-D)  $\delta$  7.94 - 7.88 (m, 2H), 7.40 - 7.35 (m, 1H), 7.29 (dd,  $J = 7.2, 1.1$  Hz, 2H), 7.26 - 7.22 (m, 2H), 7.19 (tdd,  $J = 6.6, 4.1, 2.4$  Hz, 6H), 7.12 - 7.06 (m, 1H), 6.88 - 6.79 (m, 3H), 6.25 (s, 1H).

$^{13}\text{C}$  NMR (101 MHz, CHLOROFORM-D)  $\delta$  162.9 (d,  $J = 248.0$  Hz), 156.5, 140.2, 139.5, 138.7, 135.6 (d,  $J = 2.9$  Hz), 132.3, 131.4, 129.6 (d,  $J = 8.4$  Hz, 2 $\times$ CH), 128.7(2 $\times$ CH), 128.2(2 $\times$ CH), 127.9(2 $\times$ CH), 127.8, 127.3, 126.7(2 $\times$ CH), 125.4(2 $\times$ CH), 125.1, 123.7, 115.7 (d,  $J = 21.7$  Hz, 2 $\times$ CH), 77.7.

ESI-HRMS:  $m/z$  calcd for  $\text{C}_{26}\text{H}_{18}\text{FNO}$   $[\text{M}+\text{H}]^+$ : 380.1372; found: 380.1371.

GC-MS: 379.



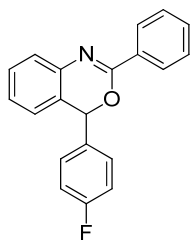

**4-(4-fluorophenyl)-2-phenyl-4H-benzo[d][1,3]oxazine (4eab):** colorless oil, 97 mg, yield: 64%.

$^1\text{H}$  NMR (400 MHz, CHLOROFORM-D)  $\delta$  8.13 - 8.08 (m, 2H), 7.45 (t,  $J = 6.9$  Hz, 1H), 7.43 - 7.31 (m, 6H), 7.16 (dd,  $J = 10.3, 4.4$  Hz, 1H), 7.04 (t,  $J = 8.6$  Hz, 2H), 6.82 (d,  $J = 7.7$  Hz, 1H), 6.41 (s, 1H).

$^{13}\text{C}$  NMR (101 MHz, CHLOROFORM-D)  $\delta$  163.0 (d,  $J = 247.9$  Hz), 156.8, 139.5, 135.8 (d,  $J = 3.3$  Hz), 132.5, 131.6, 129.8 (d,  $J = 8.3$  Hz,  $2\times\text{CH}$ ), 129.4, 128.3( $2\times\text{CH}$ ), 128.1 ( $2\times\text{CH}$ ), 126.7, 125.3, 125.2, 124.9, 115.8 (d,  $J = 21.5$  Hz,  $2\times\text{CH}$ ), 77.7.

ESI-HRMS:  $m/z$  calcd for  $\text{C}_{20}\text{H}_{14}\text{NO}$   $[\text{M}+\text{H}]^+$ :304.1059; found:304.1062.

GC-MS: 303.

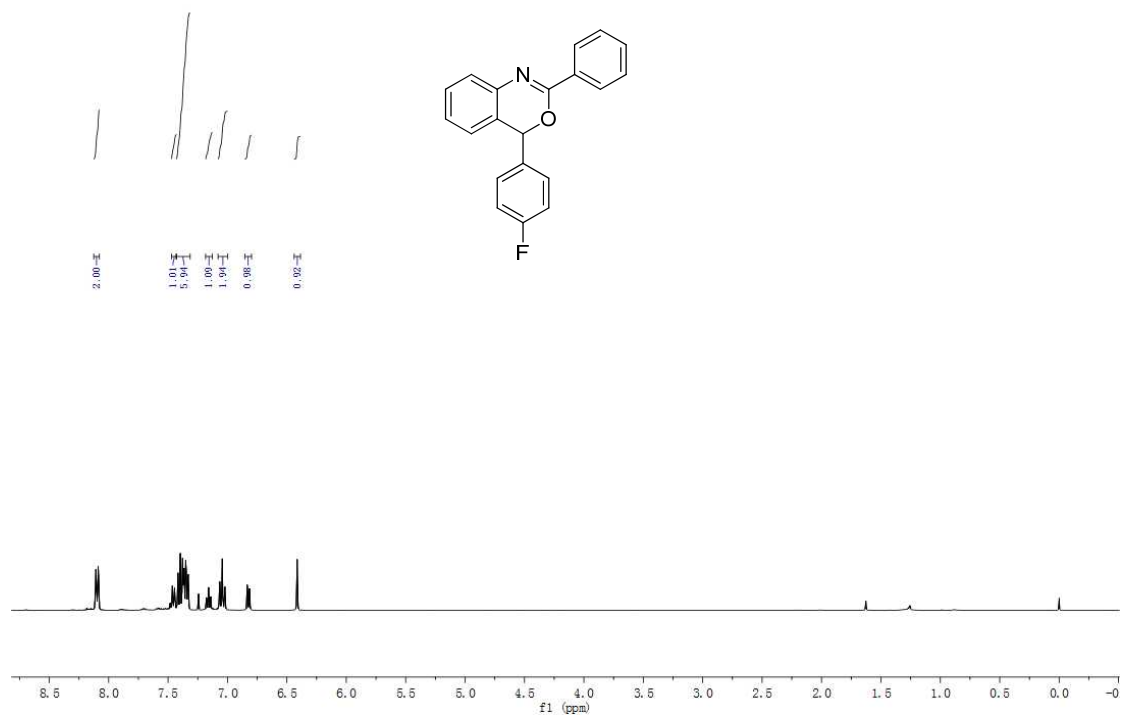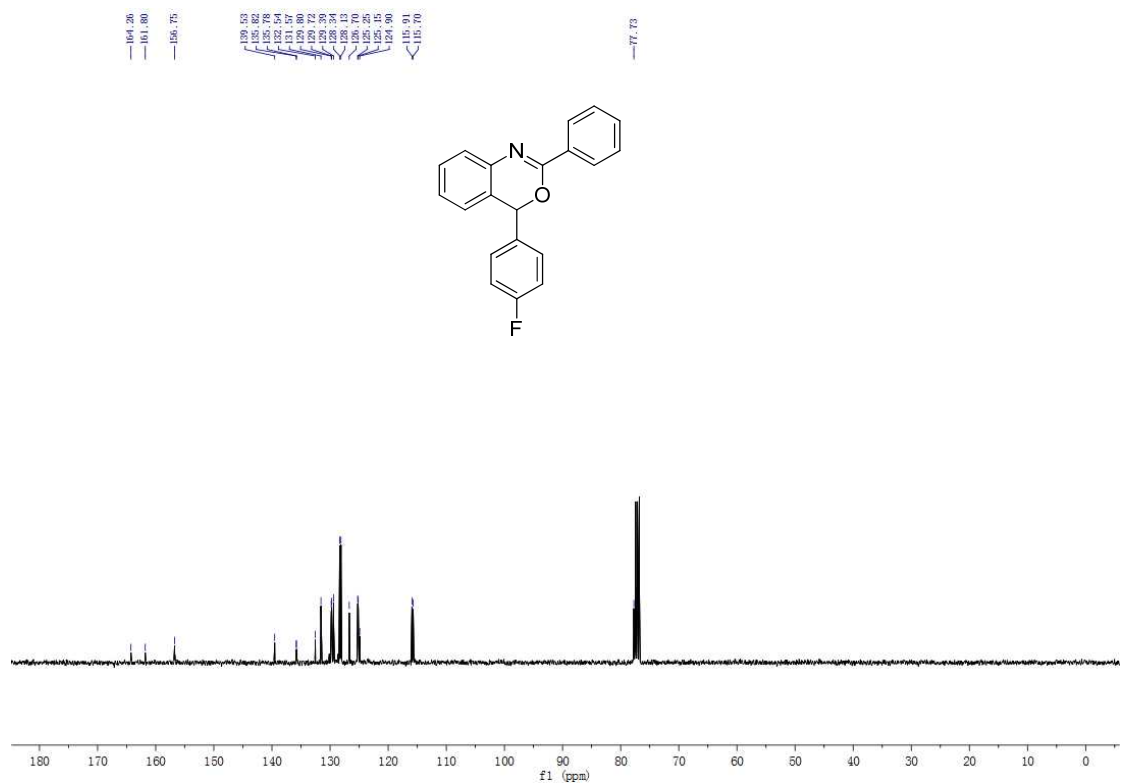

<sup>1</sup>H NMR (400 MHz, CDCl<sub>3</sub>) (up) and <sup>13</sup>C NMR (101 MHz, CDCl<sub>3</sub>) (down)



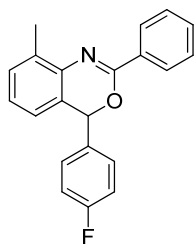

**4-(4-fluorophenyl)-8-methyl-2-phenyl-4H-benzo[d][1,3]oxazine (4fab):** colorless oil, 84 mg, yield: 53%.

$^1\text{H}$  NMR (400 MHz, CHLOROFORM-D)  $\delta$  7.96 - 7.90 (m, 2H), 7.26 - 7.23 (m, 1H), 7.19 (dd,  $J$  = 11.6, 4.6 Hz, 2H), 7.16 - 7.11 (m, 2H), 7.05 - 6.99 (m, 1H), 6.82 (dt,  $J$  = 7.0, 6.5 Hz, 3H), 6.46 (d,  $J$  = 7.3 Hz, 1H), 6.16 (s, 1H), 2.37 (s, 3H).

$^{13}\text{C}$  NMR (101 MHz, CHLOROFORM-D)  $\delta$  162.8 (d,  $J$  = 247.6 Hz), 155.5, 137.5, 135.8 (d,  $J$  = 3.2 Hz), 133.5, 132.7, 131.2, 130.5, 129.5 (d,  $J$  = 8.5 Hz, 2 $\times$ CH), 128.1(2 $\times$ CH), 127.9(2 $\times$ CH), 125.9, 124.6, 122.6, 115.5 (d,  $J$  = 21.8 Hz, 2 $\times$ CH), 77.5, 16.8.

ESI-HRMS:  $m/z$  calcd for  $\text{C}_{21}\text{H}_{16}\text{FNO}$   $[\text{M}+\text{H}]^+$ : 318.1216; found: 318.1218.

GC-MS: 317.

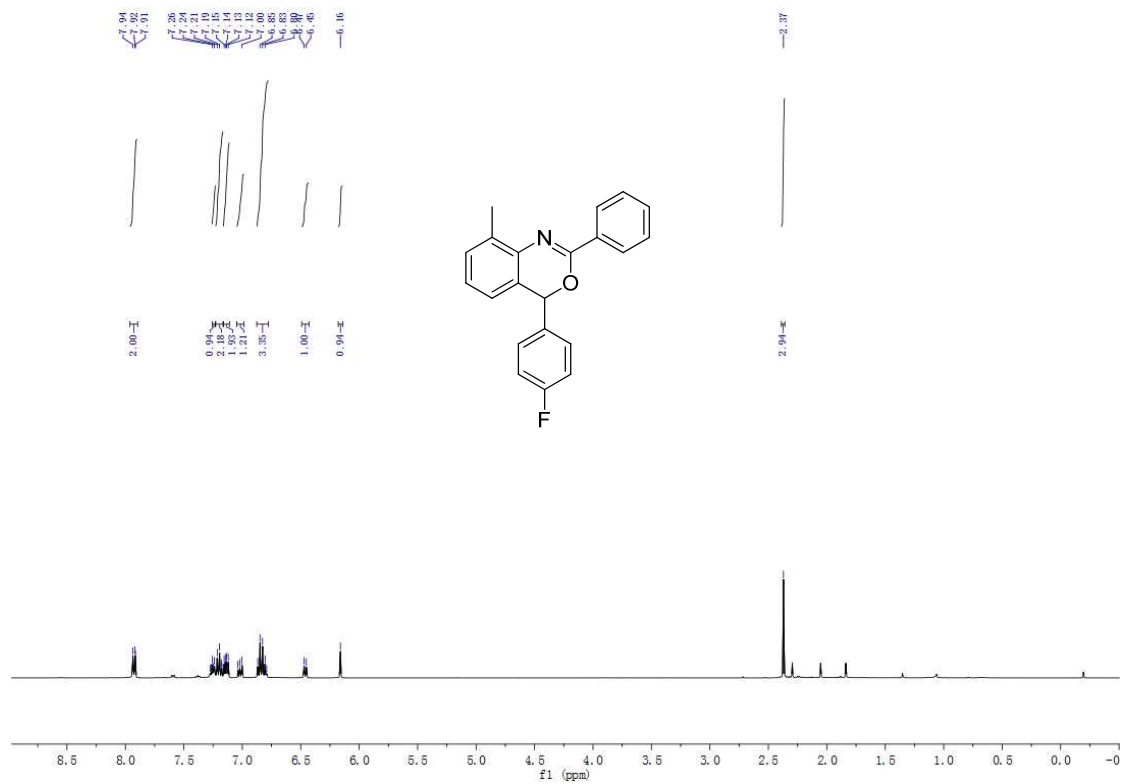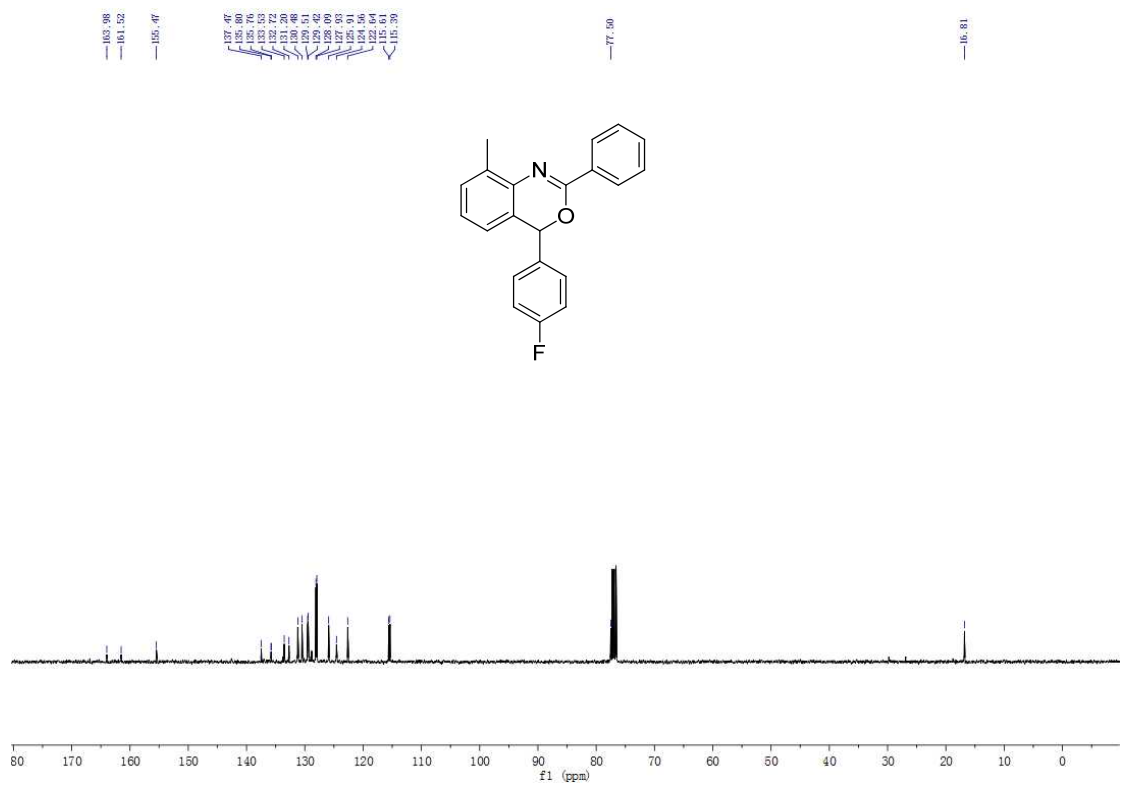

<sup>1</sup>H NMR (400 MHz, CDCl<sub>3</sub>) (up) and <sup>13</sup>C NMR (101 MHz, CDCl<sub>3</sub>) (down)

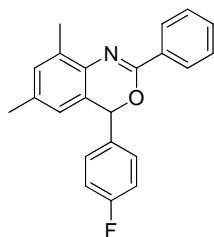

**4-(4-fluorophenyl)-6,8-dimethyl-2-phenyl-4H-benzo[d][1,3]oxazine (4gab):**

colorless oil, 146 mg, yield: 88%.

$^1\text{H}$  NMR (400 MHz, CHLOROFORM-D)  $\delta$  8.12 (dt,  $J = 8.5, 1.9$  Hz, 2H), 7.48 - 7.31 (m, 5H), 7.07 - 7.00 (m, 3H), 6.48 (s, 1H), 6.33 (s, 1H), 2.55 (s, 3H), 2.26 (s, 3H).

$^{13}\text{C}$  NMR (101 MHz, CHLOROFORM-D)  $\delta$  162.9 (d,  $J = 247.6$  Hz), 155.0, 136.2 (d,  $J = 2.9$  Hz), 136.0, 135.3, 133.5, 133.1, 131.4, 131.2, 129.7 (d,  $J = 8.4$  Hz, 2 $\times$ CH), 128.3(2 $\times$ CH), 128.0 (2 $\times$ CH), 124.6, 123.3, 115.7 (d,  $J = 21.7$  Hz, 2 $\times$ CH), 77.7, 21.3, 16.9.

ESI-HRMS:  $m/z$  calcd for  $\text{C}_{22}\text{H}_{18}\text{FNO}$   $[\text{M}+\text{H}]^+$ :332.1372; found:332.1374.

GC-MS: 331.

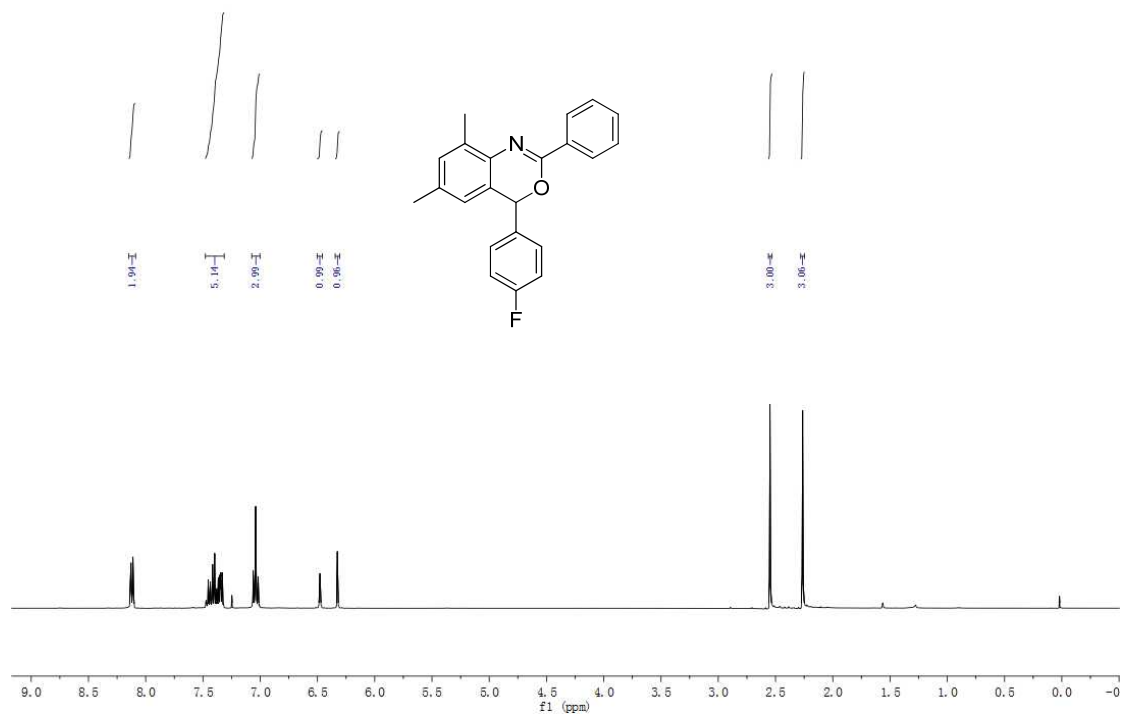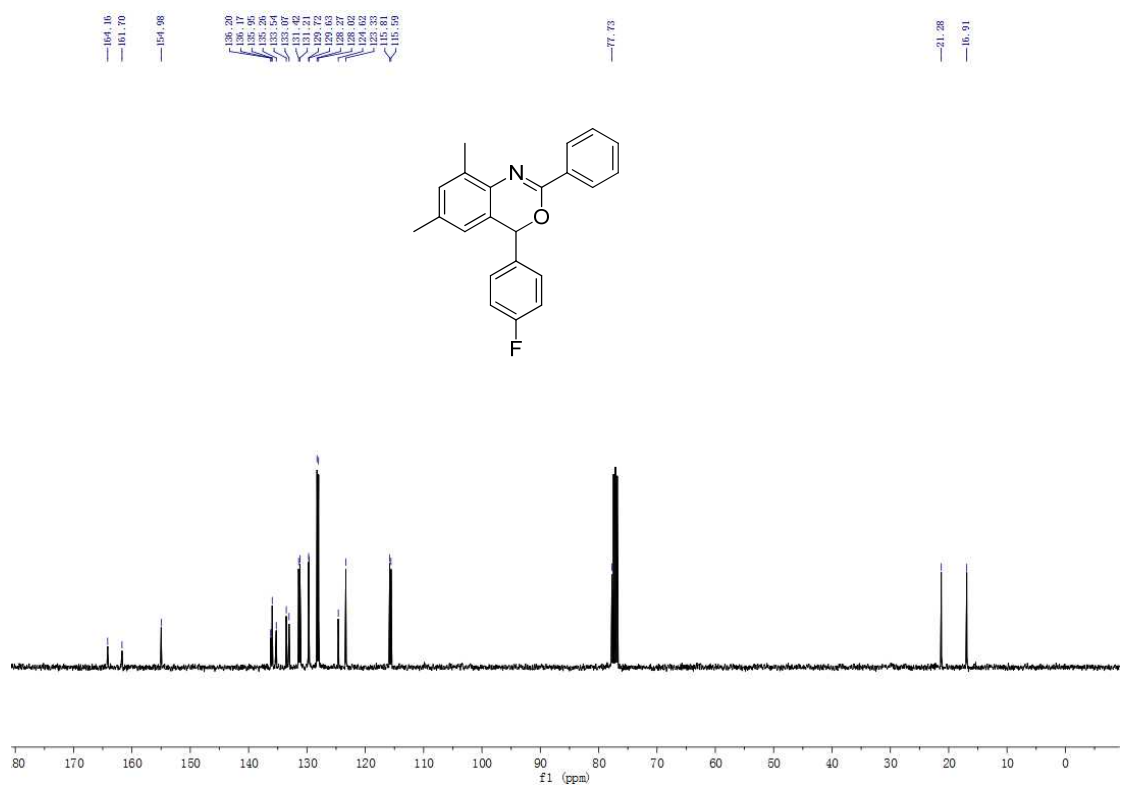

<sup>1</sup>H NMR (400 MHz, CDCl<sub>3</sub>) (up) and <sup>13</sup>C NMR (101 MHz, CDCl<sub>3</sub>) (down)

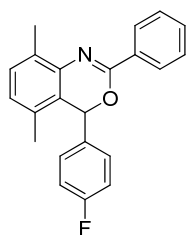

**4-(4-fluorophenyl)-5,8-dimethyl-2-phenyl-4H-benzo[d][1,3]oxazine (4hab):**

colorless oil, 66 mg, yield: 40%.

$^1\text{H}$  NMR (400 MHz, CHLOROFORM-D)  $\delta$  8.08 - 8.00 (m, 2H), 7.42 (d,  $J = 7.2$  Hz, 1H), 7.36 (t,  $J = 7.5$  Hz, 2H), 7.25 - 7.21 (m, 2H), 7.17 (d,  $J = 7.7$  Hz, 1H), 6.98 - 6.92 (m, 3H), 6.45 (s, 1H), 2.54 (s, 3H), 2.05 (s, 3H).

$^{13}\text{C}$  NMR (101 MHz, CHLOROFORM-D)  $\delta$  162.9 (d,  $J = 247.5$  Hz), 154.8, 137.5, 135.0 (d,  $J = 3.0$  Hz), 133.2, 131.4, 131.3, 130.9, 130.3, 129.8 (d,  $J = 8.5$  Hz, 2 $\times$ CH), 128.2(2 $\times$ CH), 128.0(3 $\times$ CH), 122.5, 115.8 (d,  $J = 21.8$  Hz, 2 $\times$ CH), 74.9, 17.6, 16.87.

ESI-HRMS:  $m/z$  calcd for  $\text{C}_{22}\text{H}_{18}\text{FNO}$   $[\text{M}+\text{H}]^+$ :332.1372; found:332.1371.

GC-MS: 331.

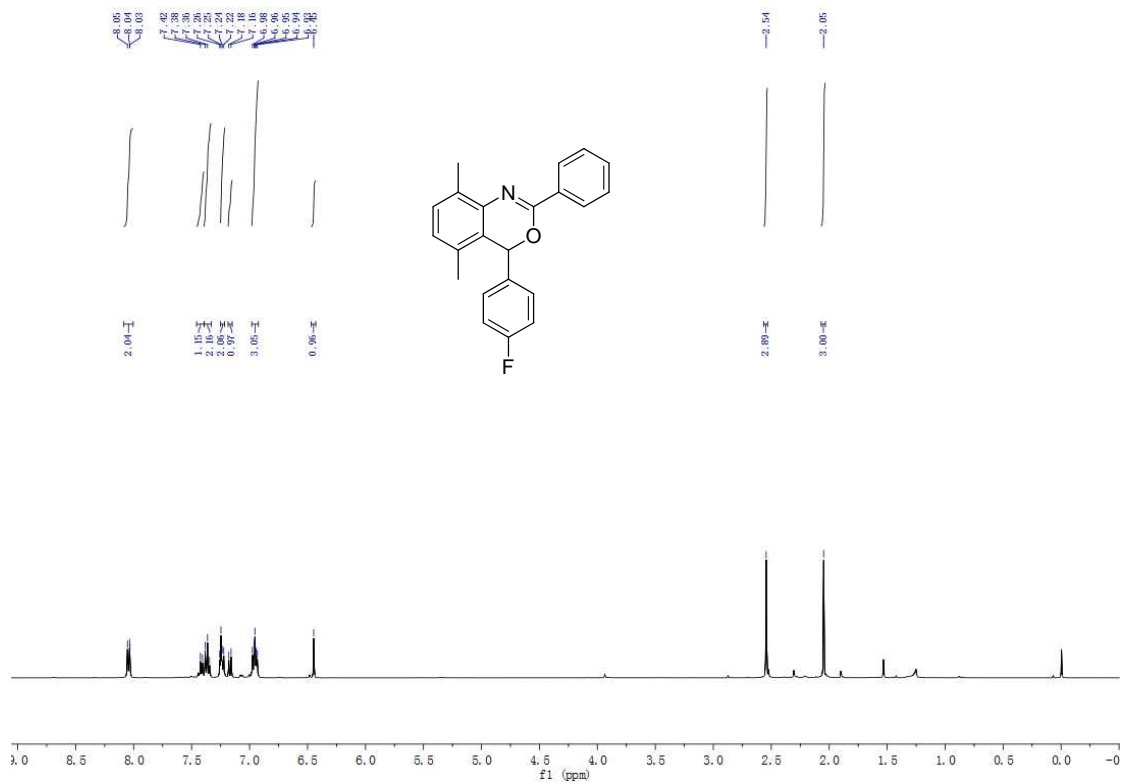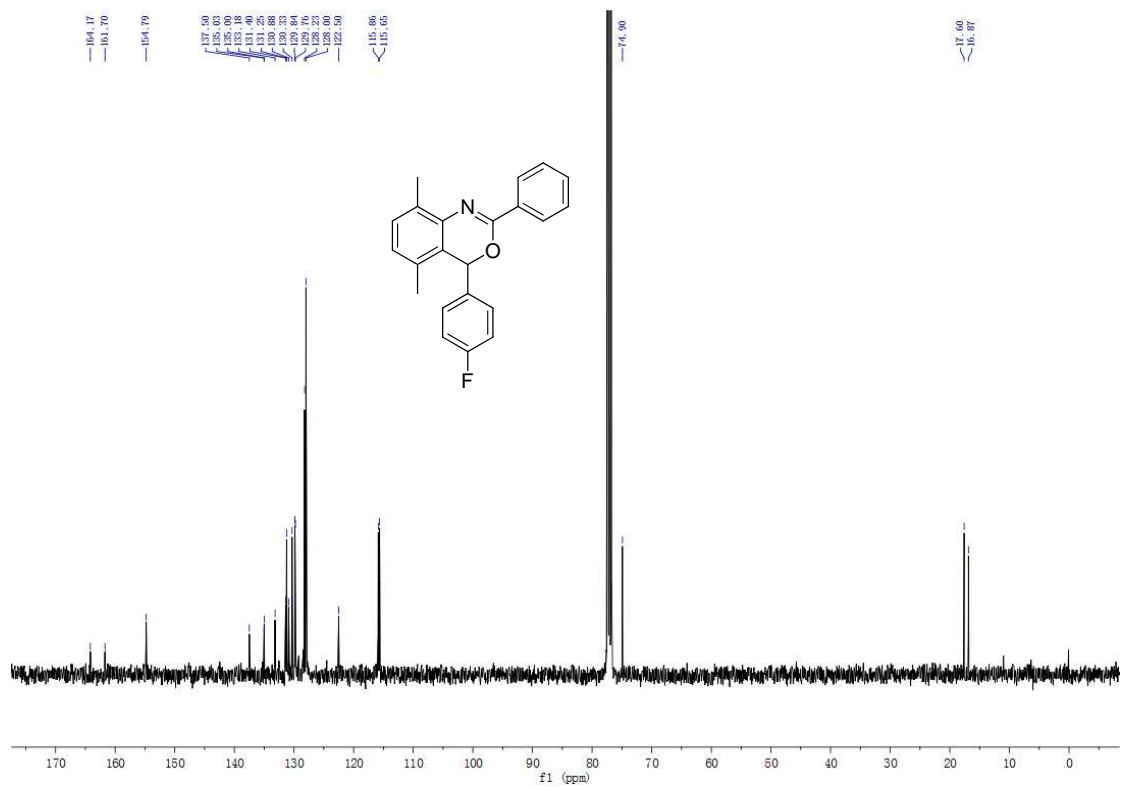

<sup>1</sup>H NMR (400 MHz, CDCl<sub>3</sub>) (up) and <sup>13</sup>C NMR (101 MHz, CDCl<sub>3</sub>) (down)

## Reference:

- 1 (a) E. Skucas and D. W. C. MacMillan, *J. Am. Chem. Soc.*, 2012, **134**, 9090; (b) M. Bielawski, M. Zhu and B. Olofsson, *Adv. Synth. Catal.*, 2007, **349**, 2610; (c) M. Bielawski and B. Olofsson, *Chem. Commun.*, 2007, 2521; (d) Bielawski and B. Olofsson, *Org. Synth.*, 2009, **86**, 308.
